# Supplementary material
Source: Royal Society of Chemistry journal article supplement (doi:10.1039/d6dt00843g)
Supplement: d6dt00843g1.pdf [file d6dt00843g1.pdf]

## Supporting Information for

### Hydroxide Anion Attack Governs O–O Bond Formation in Water Oxidation Catalysed by a Mononuclear Manganese Complex

Qinyi Huo,<sup>a</sup> Morteza Jamshidi,<sup>b</sup> Zhuofei Liu,<sup>a</sup> Matthew Longhurst,<sup>c</sup> Robert Stranger,<sup>a\*</sup> Alireza Ariaafard<sup>a\*</sup>

<sup>a</sup>Research School of Chemistry, Australian National University, Canberra, Australian Capital Territory, Australia

<sup>b</sup>School of Natural Sciences–Chemistry, University of Tasmania, Hobart, Tasmania, Australia

<sup>c</sup>Intelligent Polymer Research Institute, University of Wollongong, Wollongong, Australia

Table of contents:

**Fig. S1** Spatial plots for the  $\alpha$  (left) and  $\beta$  (right) orbitals corresponding to the  $d_{\pi}$ - $p_{\pi}$  interaction between Mn and O1 in **32**. (page S2)

**Fig. S2** Spatial plot of the NLMO orbital in **72** showing the  $\pi$  interaction between a  $\beta$  lone pair on O1 and a partially  $\alpha$ -occupied orbital centred on O2. (page S2)

**Fig. S3** Free-energy profile for the catalytic cycle shown in Fig. 8, calculated at the SMD/M06-L-D3/def2-TZVP level of theory. (page S3)

**Fig. S4** Spatial plots of the NLMOs corresponding to the Mn  $d_{xy}$  orbital with  $d_{\pi}$  character in **5TS**<sub>2-3</sub> and **72**. (page S4)

Origin of the Energy Difference Between **5TS**<sub>2-14</sub> and **3TS**<sub>2-14</sub>. (page S4)

**Fig. S5** Comparison of the O–O coupling transition structures for OH<sup>-</sup> and (H<sub>2</sub>O)<sub>2</sub>OH<sup>-</sup> attack calculated using the original <sup>t</sup>Bu-substituted ligand system and the sterically less demanding H-substituted model. (page S5)

**Fig. S6** Top, side, and perspective views of the hybridised Mn  $d_z^2$  orbital in the LUMO of **32**. (page S6)

Effect of Hydroxide Solvation Cluster Size on the FHNA Barrier. (page S6)

**Table S1.** Cartesian coordinates for all optimised structures, together with total potential energies. (page S7)

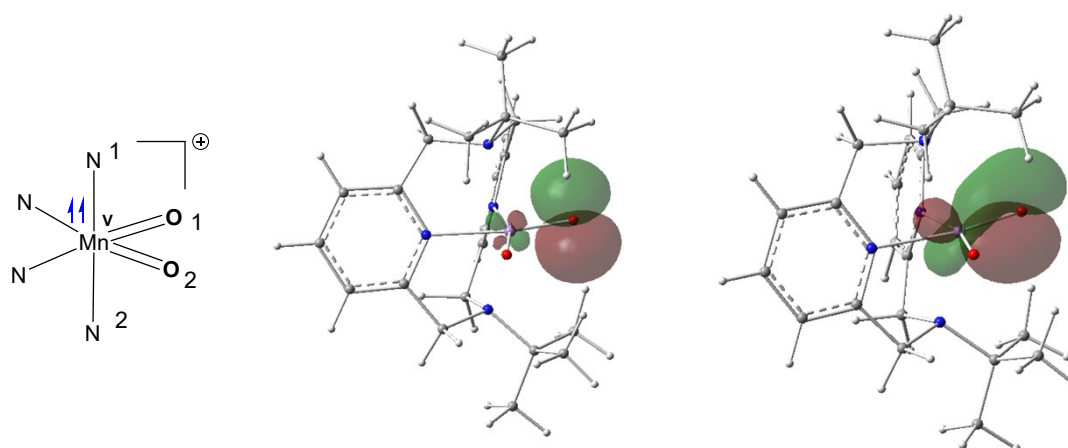

**Fig. S1** Spatial plots for the  $\alpha$  (left) and  $\beta$  (right) orbitals corresponding to the  $d_{\pi}$ - $p_{\pi}$  interaction between Mn and O1 in **32**. In the  $\alpha$  manifold, no significant interaction is observed apart from a slight antibonding character, because the Mn  $\alpha$   $d_{\pi}$  orbitals are only partially occupied and therefore do not interact effectively with the  $p_{\pi}$   $\alpha$  lone pair on O1. In contrast, in the  $\beta$  manifold, the Mn  $\beta$   $d_{\pi}$  orbitals are empty and can interact effectively with the  $p_{\pi}$   $\beta$  lone pair on O1, leading to a clear bonding interaction.

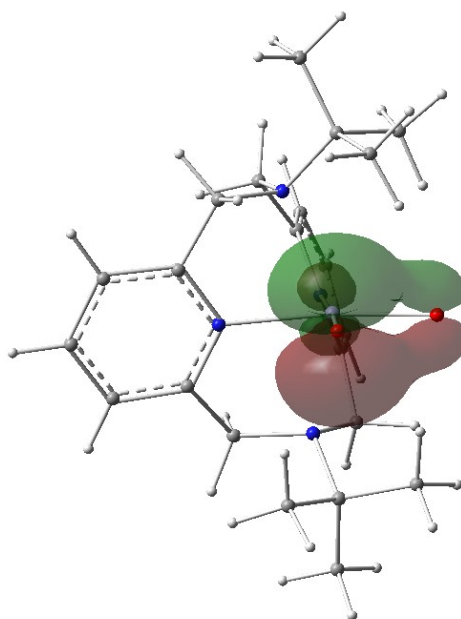

**Fig. S2** Spatial plot of the NLMO orbital in **72** showing the  $\pi$  interaction between a  $\beta$  lone pair on O1 and a partially  $\alpha$ -occupied orbital centred on O2, consistent with formation of a two-centre three-electron ( $2c-3e$ ) bond between O1 and O2.

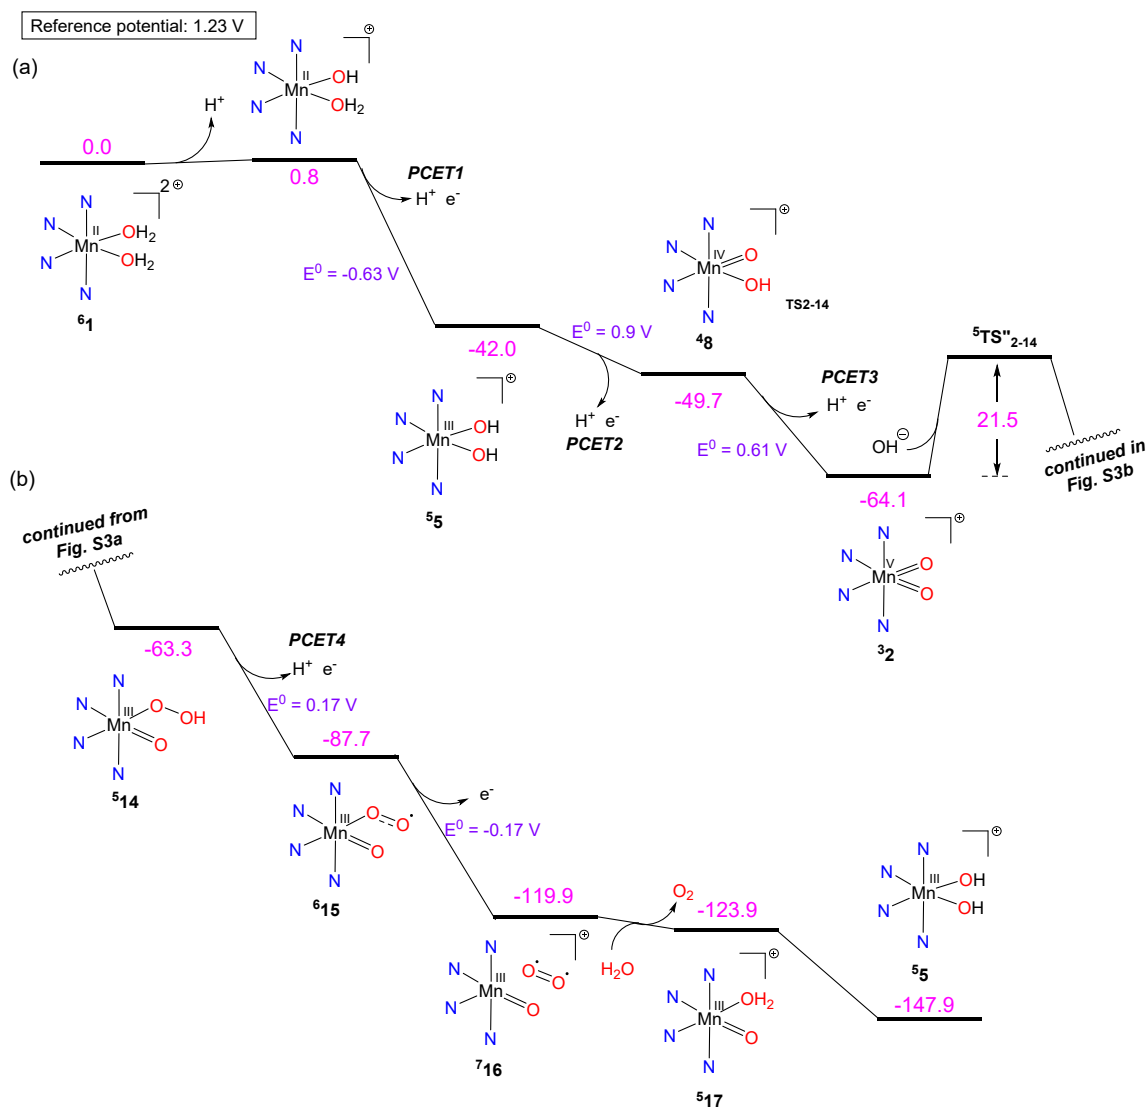

**Fig. S3** Free-energy profile for the catalytic cycle shown in Fig. 8, calculated at the SMD/M06-L-D3/def2-TZVP level of theory under an applied potential of 1.23 V and pH 12.2. The relative free energies are given in kcal/mol.

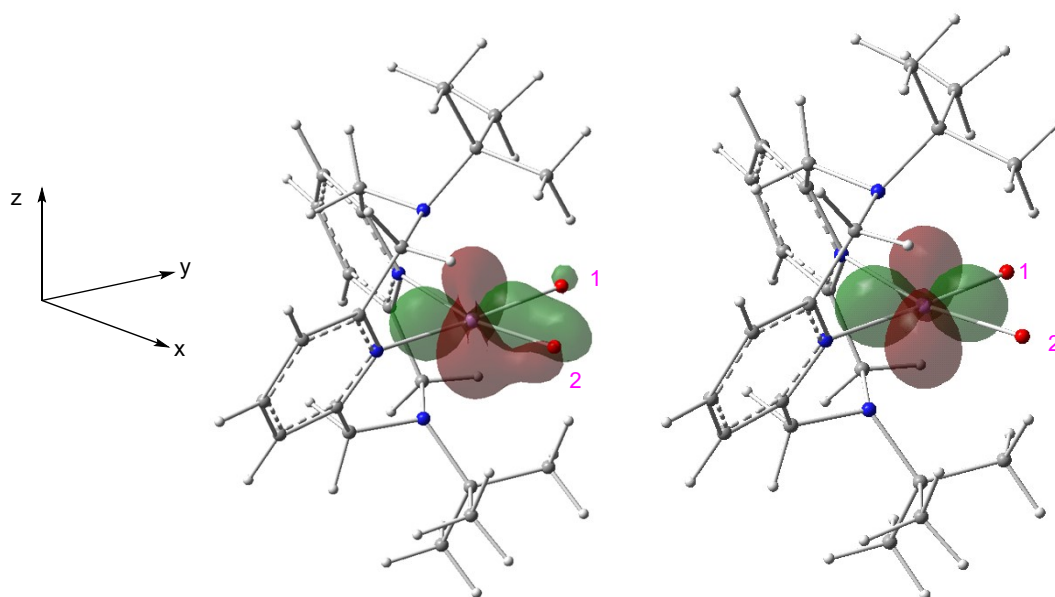

**Fig. S4** Spatial plots of the NLMOs corresponding to the Mn  $d_{xy}$  orbital with  $d_{\pi}$  character in  ${}^5\text{TS}_{2-3}$  (left) and  ${}^7\mathbf{2}$  (right). In  ${}^5\text{TS}_{2-3}$ , antiferromagnetic coupling enables  $\pi$  back-donation from a Mn  $d_{\pi}$  orbital into the vacant  $\alpha$ -spin  $p_{\pi}$  orbital of O2. In this transition structure, the unpaired electron on O2 has  $\beta$  spin, whereas the unpaired electrons on the Mn centre are  $\alpha$  spin. Consequently, the  $\alpha$ -spin  $p_{\pi}$  orbital on O2 remains vacant and is therefore available for interaction with an occupied Mn  $d_{\pi}$  orbital. In contrast, in the ferromagnetically coupled intermediate  ${}^7\mathbf{2}$ , such interaction is not possible because the relevant orbitals have parallel spin alignment. This interpretation is fully supported by the NLMO analysis of  ${}^5\text{TS}_{2-3}$  (left orbital), which shows strong interaction between the Mn  $d_{xy}$  orbital and the vacant  $\alpha$ -spin  $p_{\pi}$  orbital on O2, with a second-order perturbation stabilisation energy  $E^2$  of 31.9 kcal/mol. By contrast, the corresponding Mn  $d_{xy}$  orbital in  ${}^7\mathbf{2}$  (right orbital) remains completely nonbonding and cannot participate in  $\pi$  back-donation to the oxyl ligands because of the parallel spin alignment.

**Origin of the Energy Difference Between  ${}^5\text{TS}_{2-14}$  and  ${}^3\text{TS}_{2-14}$ .** The large difference between the barriers on the quintet and triplet surfaces can be rationalised by the substantially different stability of the resulting Mn(III) hydroperoxide intermediates, consistent with the Hammond postulate, which states that the energy of a transition state generally reflects the stability of the species formed immediately after the transition state along the reaction coordinate. In the case of the triplet surface, O–O coupling leads to the highly unstable low-spin Mn(III) intermediate  ${}^3\mathbf{14}$ , which lies 31.9 kcal/mol above  ${}^3\mathbf{2}$ . Consequently, the corresponding transition structure  ${}^3\text{TS}_{2-14}$  is also strongly destabilised and exhibits late transition-state character, with a very short O1–O3 distance of 1.59 Å. In contrast, on the quintet surface, the much greater stability of

the high-spin Mn(III) hydroperoxide intermediate **514**, which lies 1.7 kcal/mol below **32**, stabilises **<sup>5</sup>TS<sub>2-14</sub>**, which correspondingly exhibits early transition-state character with a relatively long O1–O3 distance of 1.93 Å. Thus, consistent with the Hammond postulate, the transition structure on the quintet surface (**<sup>5</sup>TS<sub>2-14</sub>**) is substantially lower in energy than that on the triplet surface (**<sup>3</sup>TS<sub>2-14</sub>**).

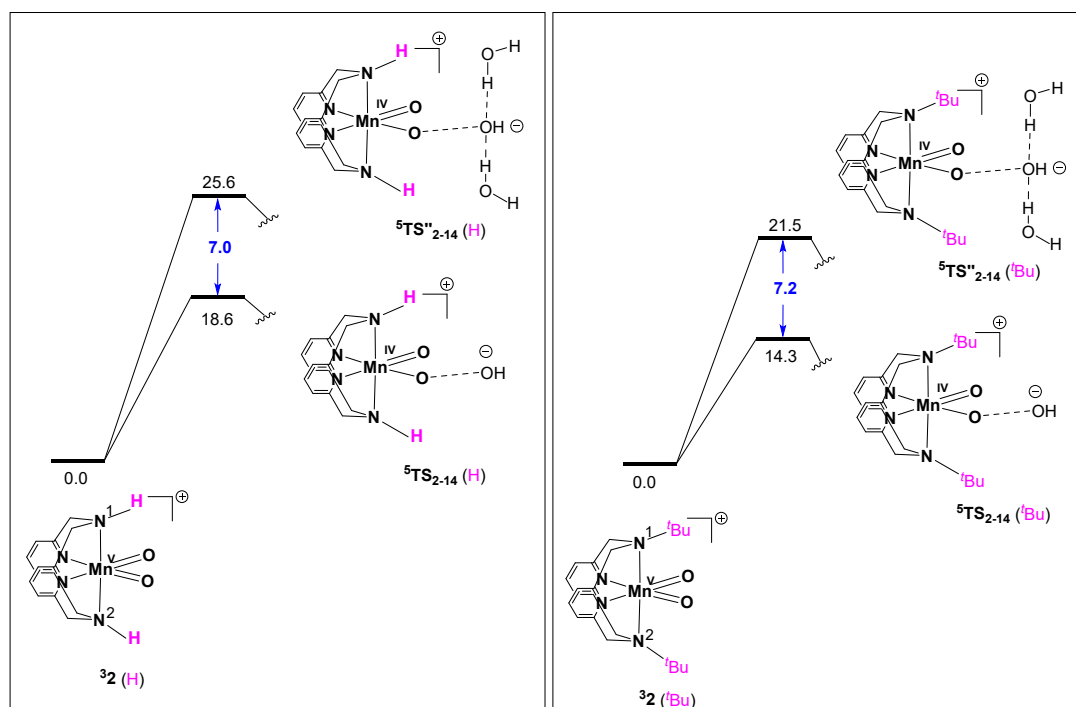

**Fig. S5** Comparison of the O–O coupling transition structures for OH<sup>−</sup> and (H<sub>2</sub>O)<sub>2</sub>OH<sup>−</sup> attack calculated using the original <sup>t</sup>Bu-substituted ligand system and the sterically less demanding H-substituted model. To examine whether steric effects have any significant contribution to the increased barrier for (H<sub>2</sub>O)<sub>2</sub>OH<sup>−</sup> attack relative to OH<sup>−</sup> attack, additional calculations were performed in which the bulky <sup>t</sup>Bu substituents of the ligand were replaced by H atoms, thereby minimising steric interactions around the Mn centre. The calculated energy difference between **<sup>5</sup>TS<sub>2-14</sub>(H)** and **<sup>5</sup>TS''<sub>2-14</sub>(H)** is 7.0 kcal/mol, which is very similar to the corresponding difference between **<sup>5</sup>TS<sub>2-14</sub>(<sup>t</sup>Bu)** and **<sup>5</sup>TS''<sub>2-14</sub>(<sup>t</sup>Bu)**. This result shows that steric effects contribute insignificantly to the barrier increase upon going from OH<sup>−</sup> to (H<sub>2</sub>O)<sub>2</sub>OH<sup>−</sup>. Therefore, the reactivity trend is controlled predominantly by the electronic properties of the nucleophile, especially the stabilisation of the hydroxide HOMO through hydrogen bonding, which reduces its nucleophilicity and increases the O–O coupling barrier.

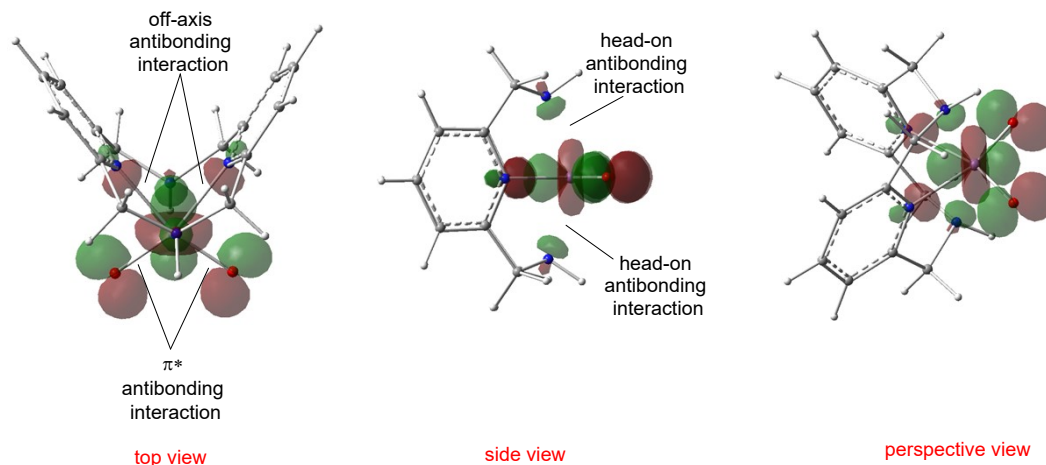

**Fig. S6** Top, side, and perspective views of the hybridised Mn  $d_z^2$  orbital in the LUMO of **32**. The orbital shown in this figure a hybridised orbital with predominant Mn  $d_z^2$  character. This hybridised  $d_z^2$  orbital exhibits antibonding interactions with all ligands in the LUMO of **32**. However, the strongest antibonding interactions occur with the axial N1 and N2 donor atoms because they interact with the Mn  $d_z^2$  orbital in a direct head-on fashion. In contrast, antibonding interactions with the remaining N donor atoms are off-axis in nature and therefore considerably weaker. The antibonding interactions with the oxo ligands are primarily  $\pi^*$ -type. Consequently, the energy of this empty  $d_z^2$  orbital is governed primarily by the extent of the axial Mn–N1 and Mn–N2  $\sigma^*$ -antibonding interactions. The stronger the  $\sigma$ -donor ability of N1 and N2, the greater the  $\sigma^*$ -antibonding interaction and, consequently, the higher the energy of the  $d_z^2$  orbital. Since the X substituents influence the donor ability of the N1 and N2 atoms, they directly modulate the energy of this  $d_z^2$  orbital. Because this hybridised  $d_z^2$  orbital acts as the primary acceptor orbital for the electron transferred during the interaction between  $\text{OH}^-$  and the oxyl radical ligand in the O–O coupling step, lowering its energy increases the oxidising capability of the Mn centre and facilitates this electron-transfer process. Consequently, the lower the energy of this  $d_z^2$  orbital, the lower the barrier to O–O coupling.

**Effect of Hydroxide Solvation Cluster Size on the FHNA Barrier.** To assess the effect of larger hydroxide solvation clusters, additional calculations were performed using  $(\text{H}_2\text{O})_4\text{OH}^-$ . The calculated HOMO energy of this species is  $-5.49$  eV, which is very similar to that of  $(\text{H}_2\text{O})_2\text{OH}^-$  ( $-5.47$  eV). Therefore, the nucleophilicity of  $(\text{H}_2\text{O})_4\text{OH}^-$  is expected to be very similar to that of  $(\text{H}_2\text{O})_2\text{OH}^-$ , and consequently the corresponding O–O coupling barriers should also be comparable. Indeed, our calculations show that O–O bond formation via the FHNA mechanism proceeds through transition structure  ${}^5\text{TS}''_{2-14}$  with an activation free energy of 20.0 kcal/mol, 1.5 kcal/mol lower than that calculated for  $(\text{H}_2\text{O})_2\text{OH}^-$  (21.5 kcal/mol). The lower barrier obtained for  $(\text{H}_2\text{O})_4\text{OH}^-$  appears to arise from the greater conformational flexibility of the larger water cluster, which can reorganise during the O–O coupling process and form additional hydrogen-bonding interactions with the oxo ligand, thereby

providing extra stabilisation of the transition structure. It should also be noted that numerous previous benchmark studies have shown that the combination of an implicit solvation model with two explicit water molecules provides one of the most reliable descriptions of the solvation of anions in aqueous solution (ref 12). The very similar HOMO energies and activation barriers obtained for  $(\text{H}_2\text{O})_2\text{OH}^-$  and  $(\text{H}_2\text{O})_4\text{OH}^-$  therefore suggest that the mechanistic conclusions should not be sensitive to the size of the hydroxide solvation cluster.

**Table S1.** Cartesian coordinates for all optimised structures, together with total potential energies, enthalpies, and Gibbs free energies calculated at the SMD/M06-L-D3/def2-TZVP level of theory, and single-point potential energies obtained at the SMD/B3LYP\*-D3/ def2-TZVP// SMD/M06-L-D3/def2-TZVP level in water.

**32**

E (SMD/M06-L-D3/def2-TZVP) = -2378.273456 au  
H (SMD/M06-L-D3/def2-TZVP) = -2377.722901 au  
G (SMD/M06-L-D3/def2-TZVP) = -2377.802912 au  
E (SMD/B3LYP\*-D3/def2-TZVP//SMD/M06-L-D3/def2-TZVP) = -2377.599939 au  
Mn -0.48206800 0.21606300 -0.12343700  
N -2.39811500 0.69668600 0.96787500  
N 1.66356100 -0.29431300 0.16801800  
O -1.11952700 -1.01107100 -1.01724400  
O -0.19614500 1.52591100 -1.08140800  
N -0.58283200 -1.11713400 1.47640300  
C 0.52667800 -1.72490900 1.88618500  
C 1.79263600 -1.07106600 1.45145700  
C 0.44559100 -2.81649000 2.73501500  
H 1.34544300 -3.32063500 3.05874100  
C -0.80796000 -3.22656000 3.16051200  
H -0.89784200 -4.07243400 3.82901800  
C -1.94771700 -2.55078100 2.74782400  
H -2.93113200 -2.84164500 3.08950000  
C -1.80034300 -1.48722400 1.87666500  
C -2.91089400 -0.66090800 1.31002600  
N 0.18574800 1.45396300 1.42295200  
C 1.46436900 1.82825600 1.35921600  
C 2.28692000 1.04428700 0.38603000  
C 1.92199500 2.86500400 2.15109900  
H 2.96127200 3.15990400 2.11471400  
C 1.01326900 3.51212200 2.97667200  
H 1.34185100 4.33891800 3.59226000  
C -0.30952800 3.10108900 3.02577300  
H -1.02846800 3.58669000 3.67080900  
C -0.69744200 2.03684800 2.22836300

C -2.04071000 1.39174400 2.25244300  
H -3.73617500 -0.59662100 2.02229900  
H -3.29127800 -1.13116800 0.40327000  
H 2.60939400 -1.78655200 1.38782300  
H 2.07973200 -0.37594600 2.24326100  
H 3.30986600 0.93862000 0.75241600  
H 2.32899300 1.57121000 -0.56683400  
H -2.81613100 2.09929500 2.53830000  
H -2.02248100 0.64545400 3.04968200  
C 2.29995500 -1.05860500 -1.00645200  
C -3.40660800 1.52169300 0.15240900  
C -4.77689000 1.49878900 0.82170400  
C -3.52077800 0.94972200 -1.25084600  
C -2.89638700 2.95319400 0.06013500  
C 1.90636100 -0.39763300 -2.31633600  
C 1.77551700 -2.48767000 -0.99341600  
C 3.81947900 -1.06158000 -0.87646800  
H -4.73712600 1.80091800 1.86789800  
H -5.42592800 2.20343200 0.30415000  
H -5.24560600 0.51777000 0.76173700  
H -2.58232700 1.04405600 -1.79368500  
H -3.82270400 -0.09620800 -1.25751400  
H -4.28375700 1.51139400 -1.78841600  
H -3.50677300 3.49121000 -0.66319500  
H -2.96948400 3.49155600 1.00383500  
H -1.86368000 2.98135000 -0.28572100  
H 0.83464600 -0.47085800 -2.49000500  
H 2.19566700 0.65080100 -2.36227100  
H 2.41950800 -0.91272900 -3.12744700  
H 2.18139600 -3.08033300 -0.17507400  
H 0.68765900 -2.50845700 -0.94117500  
H 2.07600400 -2.97398600 -1.91988700  
H 4.15702200 -1.43125400 0.09135400  
H 4.22792600 -1.72451600 -1.63754500  
H 4.24726900 -0.07366500 -1.03930200

**32'**

E (SMD/M06-L-D3/def2-TZVP) = -2454.739426 au  
H (SMD/M06-L-D3/def2-TZVP) = -2454.163154 au  
G (SMD/M06-L-D3/def2-TZVP) = -2454.248322 au  
E (SMD/B3LYP\*-D3/def2-TZVP//SMD/M06-L-D3/def2-TZVP) = -2454.047396 au  
Mn -0.13180400 -0.08912900 -0.05534300  
N -2.05474600 0.38669200 1.04388500

N 2.01806400 -0.59598100 0.25614400  
O -0.76867100 -1.30891400 -0.96726700  
O 0.15704900 1.21563200 -1.02731700  
N -0.24093100 -1.42652400 1.53805600  
C 0.86790600 -2.02754100 1.96058200  
C 2.13235400 -1.35895900 1.54888800  
C 0.78515900 -3.12368200 2.80295700  
H 1.68537000 -3.62122300 3.13557600  
C -0.46995700 -3.54671600 3.21042400  
H -0.56140800 -4.39737400 3.87253600  
C -1.60913600 -2.87537600 2.78985900  
H -2.59441300 -3.17273700 3.12024900  
C -1.45950500 -1.80541900 1.92719700  
C -2.56828300 -0.97495400 1.36620800  
N 0.52811100 1.15064500 1.48987900  
C 1.80530500 1.53142100 1.42992200  
C 2.63538600 0.74638600 0.46581700  
C 2.25789400 2.56682100 2.22613700  
H 3.29595600 2.86587000 2.19082300  
C 1.34737100 3.20424900 3.05690800  
H 1.67210000 4.02950700 3.67651100  
C 0.02843300 2.78211000 3.10854400  
H -0.69184500 3.25618200 3.76052800  
C -0.35465300 1.72081700 2.30521200  
C -1.69013700 1.06302400 2.33547400  
H -3.39551800 -0.92053400 2.07696300  
H -2.94597500 -1.43352200 0.45250300  
H 2.96073000 -2.06254900 1.50837600  
H 2.39126800 -0.65306900 2.34073100  
H 3.65603000 0.64704400 0.84005600  
H 2.68217500 1.26487400 -0.49129900  
H -2.46814600 1.75939800 2.64078200  
H -1.65573300 0.30520500 3.12105000  
C 2.67890200 -1.37391000 -0.89598000  
C -3.07044100 1.22737700 0.25470400  
C -4.43145900 1.20556200 0.94299300  
C -3.20676500 0.67381500 -1.15155200  
C -2.54978400 2.65545100 0.17001000  
C 2.30715600 -0.73154300 -2.21926600  
C 2.15317600 -2.80232700 -0.87641300  
C 4.19575500 -1.37240700 -0.73700200  
H -4.37834900 1.49190500 1.99282200  
H -5.08063700 1.92264000 0.44305200  
H -4.90859400 0.22929400 0.87364500

H -2.27732000 0.77842900 -1.70560500  
H -3.50718100 -0.37264000 -1.16977300  
H -3.97753300 1.24135800 -1.67164200  
H -3.16863200 3.20755800 -0.53522200  
H -2.59946000 3.18313000 1.12123000  
H -1.52353100 2.67871500 -0.19562000  
H 1.24246100 -0.82897300 -2.41532200  
H 2.57618400 0.32238000 -2.26954300  
H 2.84745900 -1.24386500 -3.01438100  
H 2.54148100 -3.38715800 -0.04406100  
H 1.06422300 -2.82080100 -0.84576400  
H 2.47026400 -3.29911000 -1.79167600  
H 4.51789200 -1.72370300 0.24266900  
H 4.61769100 -2.04828400 -1.47902800  
H 4.62476700 -0.38697400 -0.91089800  
O -0.77041000 0.06780400 -3.51374800  
H -0.96135200 -0.64784500 -2.88545500  
H -0.36068800 0.71711800 -2.91799800

**<sup>3</sup>TS<sub>2-13</sub>**

E (SMD/M06-L-D3/def2-TZVP) = -2454.712786 au  
H (SMD/M06-L-D3/def2-TZVP) = -2454.140511 au  
G (SMD/M06-L-D3/def2-TZVP) = -2454.225561 au  
E (SMD/B3LYP\*-D3/def2-TZVP//SMD/M06-L-D3/def2-TZVP) = -2454.014303 au  
Mn -0.14871100 -0.11393400 0.00506000  
N -2.06136000 0.35740700 1.07918300  
N 1.99861200 -0.61124900 0.26869400  
O -0.83947100 -1.40317700 -0.98537200  
O 0.06939800 1.05551500 -1.15917500  
N -0.24943600 -1.44943300 1.56696800  
C 0.86933100 -2.03348700 1.99263200  
C 2.11990600 -1.33510700 1.58468400  
C 0.80093700 -3.12920200 2.83469200  
H 1.70659600 -3.61431400 3.17041300  
C -0.45016800 -3.56889500 3.23957400  
H -0.53061500 -4.42139200 3.90072300  
C -1.59873700 -2.91054900 2.82383200  
H -2.57887100 -3.21876000 3.15912400  
C -1.46295800 -1.83652300 1.96452100  
C -2.57706100 -1.00076800 1.42277500  
N 0.50965500 1.18282200 1.43102900  
C 1.79043700 1.55698000 1.36027900  
C 2.61069500 0.74359600 0.41592800

C 2.25012800 2.59416700 2.14836600  
H 3.28849500 2.88968700 2.10196500  
C 1.35067800 3.23012700 2.99173800  
H 1.68304400 4.05598700 3.60626300  
C 0.03660700 2.79791900 3.07268400  
H -0.67074100 3.25980000 3.74679000  
C -0.35951000 1.73858800 2.27550200  
C -1.67715400 1.05369500 2.35365700  
H -3.38527600 -0.92951600 2.15333300  
H -2.98390600 -1.45920000 0.52237500  
H 2.97154700 -2.01128800 1.57492200  
H 2.34100800 -0.59886400 2.36022200  
H 3.63706100 0.66659600 0.77801000  
H 2.63938600 1.22064600 -0.56335000  
H -2.46233000 1.73457700 2.67459900  
H -1.59945900 0.30392700 3.14379200  
C 2.66199600 -1.42783700 -0.86100000  
C -3.08744900 1.19471900 0.29234900  
C -4.43170100 1.19599900 1.01346700  
C -3.26457100 0.61732000 -1.09841900  
C -2.55235400 2.61418300 0.17085600  
C 2.31414600 -0.82000400 -2.20584100  
C 2.12759000 -2.85118900 -0.80291200  
C 4.17809300 -1.42967100 -0.68731800  
H -4.35708000 1.50316700 2.05573500  
H -5.08527900 1.90748100 0.51144400  
H -4.91635600 0.22196600 0.97247700  
H -2.34771800 0.69388100 -1.67610700  
H -3.58491600 -0.42333400 -1.09136900  
H -4.03793200 1.18988100 -1.60879600  
H -3.18846100 3.16395700 -0.52048100  
H -2.56281300 3.15579600 1.11545400  
H -1.53973600 2.62113400 -0.23203700  
H 1.25007300 -0.88615100 -2.41646300  
H 2.62119700 0.22132900 -2.29075000  
H 2.84837300 -1.37581600 -2.97552400  
H 2.49814800 -3.40960100 0.05527400  
H 1.03858200 -2.86460400 -0.79327100  
H 2.45993100 -3.37900500 -1.69499100  
H 4.49514300 -1.75621600 0.30203600  
H 4.59863700 -2.12814100 -1.40887300  
H 4.61406600 -0.45244200 -0.88739500  
O -0.89924500 -0.40163700 -3.28945300  
H -0.85484100 0.55773800 -3.20293800

H -0.90657700 -1.00185000 -1.95104500

**<sup>3</sup>13**

E (SMD/M06-L-D3/def2-TZVP) = -2454.715529 au

H (SMD/M06-L-D3/def2-TZVP) = -2454.13986 au

G (SMD/M06-L-D3/def2-TZVP) = -2454.225818 au

E (SMD/B3LYP\*-D3/def2-TZVP//SMD/M06-L-D3/def2-TZVP) = -2454.0153 au

Mn -0.17501800 -0.12233500 0.02155700

N -2.06893400 0.34358200 1.09122400

N 1.98541100 -0.62419300 0.26716500

O -0.90938400 -1.38968700 -1.04558100

O 0.04537200 1.06512100 -1.16405800

N -0.25771300 -1.47505600 1.55704500

C 0.86518100 -2.04629000 1.99207900

C 2.11101200 -1.33632800 1.58615100

C 0.80260900 -3.13225000 2.84662300

H 1.71085700 -3.60717300 3.18986700

C -0.44615600 -3.57423300 3.25711700

H -0.52161800 -4.42003100 3.92744000

C -1.59799700 -2.92247300 2.84052000

H -2.57553000 -3.22710500 3.18645400

C -1.46796300 -1.85631500 1.97031300

C -2.58419100 -1.01447600 1.44280200

N 0.50474500 1.18181900 1.41903900

C 1.78353400 1.55827400 1.33458100

C 2.60077200 0.73043500 0.39771600

C 2.24447000 2.60820400 2.10524500

H 3.28130600 2.90761200 2.04925400

C 1.34747600 3.25251000 2.94539100

H 1.68049900 4.08865900 3.54552300

C 0.03562400 2.81568400 3.04310900

H -0.66785400 3.28421500 3.71672000

C -0.36069300 1.74353600 2.26351800

C -1.67237100 1.04694500 2.36028300

H -3.38163500 -0.93987100 2.18451200

H -3.00659900 -1.46883500 0.54785100

H 2.97304100 -1.99981900 1.58927400

H 2.31454700 -0.59147200 2.35835500

H 3.62781800 0.65709300 0.75947100

H 2.62943500 1.19629600 -0.58706000

H -2.45966600 1.72054100 2.69084300

H -1.57681400 0.29806300 3.14933200

C 2.63367600 -1.45462500 -0.85708000

C -3.11124100 1.17524300 0.31485600  
C -4.44219700 1.18141400 1.06079800  
C -3.31932800 0.58721200 -1.06815500  
C -2.57971200 2.59403500 0.17442300  
C 2.24360900 -0.88565500 -2.20797700  
C 2.11480100 -2.88246000 -0.76417200  
C 4.15249400 -1.43742200 -0.71688300  
H -4.35110400 1.49684900 2.09918400  
H -5.10454900 1.88875400 0.56439900  
H -4.92782900 0.20732400 1.03567800  
H -2.41603900 0.65168700 -1.66799400  
H -3.65323900 -0.44872500 -1.04362400  
H -4.09922900 1.16389100 -1.56420500  
H -3.22993100 3.13962900 -0.50705700  
H -2.57233100 3.14068600 1.11628500  
H -1.57519700 2.59768000 -0.24812000  
H 1.18422400 -1.03279600 -2.39830400  
H 2.47596500 0.17312400 -2.31090000  
H 2.80273700 -1.41801700 -2.97640800  
H 2.50846900 -3.42530600 0.09352300  
H 1.02599400 -2.90548800 -0.73153900  
H 2.43111600 -3.42079300 -1.65586400  
H 4.49048700 -1.73531600 0.27484500  
H 4.56774400 -2.14905000 -1.42855100  
H 4.57354100 -0.46046200 -0.94845100  
O -0.76318100 0.29905700 -3.19050400  
H 0.17055200 0.46677300 -3.36588700  
H -0.91745200 -0.92913300 -1.92404800

**<sup>3</sup>TS<sub>13-9</sub>**

E (SMD/M06-L-D3/def2-TZVP) = -2454.691386 au  
H (SMD/M06-L-D3/def2-TZVP) = -2454.115749 au  
G (SMD/M06-L-D3/def2-TZVP) = -2454.200094 au  
E (SMD/B3LYP\*-D3/def2-TZVP//SMD/M06-L-D3/def2-TZVP) = -2454.005923 au  
Mn -0.15994100 -0.14649400 0.08529500  
N -2.06202300 0.33824600 1.09033000  
N 1.97737800 -0.62935500 0.27174300  
O -0.90364300 -1.42416800 -1.06947600  
O 0.06230400 1.16855700 -1.14727000  
N -0.25518800 -1.49070100 1.54929400  
C 0.86851600 -2.05907200 1.99473300  
C 2.11297800 -1.34455300 1.58678000  
C 0.80697400 -3.13389300 2.86184100

H 1.71716800 -3.60389700 3.20746800  
C -0.43999900 -3.56956500 3.28742300  
H -0.51419100 -4.40717800 3.96786600  
C -1.58973400 -2.91309000 2.87179400  
H -2.56645900 -3.20454800 3.23183600  
C -1.46353100 -1.86126400 1.98361800  
C -2.58069800 -1.01415300 1.46460000  
N 0.49824900 1.20300800 1.38476000  
C 1.78492200 1.56740300 1.32479200  
C 2.60395900 0.72343500 0.40267900  
C 2.25024600 2.60975700 2.10210500  
H 3.29239500 2.89364200 2.05825700  
C 1.35386300 3.26992000 2.93223000  
H 1.68924100 4.10357600 3.53417000  
C 0.03763500 2.83931200 3.01791900  
H -0.66640700 3.30845000 3.69116400  
C -0.36142500 1.76994500 2.23753200  
C -1.66864800 1.06059200 2.34885900  
H -3.36717200 -0.93200600 2.21743800  
H -3.02001000 -1.47311900 0.58028000  
H 2.97976600 -2.00227400 1.58981500  
H 2.31144700 -0.59860800 2.35920000  
H 3.62669600 0.64326600 0.77528900  
H 2.64833700 1.18025800 -0.58529800  
H -2.46171000 1.72560500 2.68426700  
H -1.55564100 0.31917600 3.14258700  
C 2.62487600 -1.45164300 -0.85692700  
C -3.11425400 1.15280800 0.31182000  
C -4.44811700 1.14872200 1.05240100  
C -3.31341200 0.55771500 -1.07043200  
C -2.60698900 2.58070400 0.16362500  
C 2.21522100 -0.87860900 -2.20099700  
C 2.11902500 -2.88474600 -0.76700400  
C 4.14461200 -1.42801700 -0.73512100  
H -4.36092800 1.46744000 2.09038200  
H -5.11778200 1.84828000 0.55450300  
H -4.92518500 0.17019000 1.03067400  
H -2.41294500 0.63445500 -1.67161600  
H -3.62884300 -0.48374700 -1.04349600  
H -4.10233000 1.11958800 -1.56965600  
H -3.26725100 3.11153100 -0.52024200  
H -2.61033100 3.13191800 1.10290500  
H -1.60256800 2.60144800 -0.25726400  
H 1.15317600 -1.03323100 -2.37532000

H 2.44523100 0.18187400 -2.30001000  
H 2.76410900 -1.40241100 -2.98252500  
H 2.52575000 -3.42681200 0.08517000  
H 1.03105900 -2.91763200 -0.72437100  
H 2.43247600 -3.41707200 -1.66353300  
H 4.49369900 -1.72920600 0.25200500  
H 4.55713900 -2.13410600 -1.45405500  
H 4.55966100 -0.44815200 -0.96554500  
O -0.41238100 0.91525600 -2.62781100  
H 0.45466900 0.79372900 -3.04111100  
H -0.96975100 -0.95443100 -1.91404000

<sup>3</sup>g

E (SMD/M06-L-D3/def2-TZVP) = -2454.691499 au  
H (SMD/M06-L-D3/def2-TZVP) = -2454.114538 au  
G (SMD/M06-L-D3/def2-TZVP) = -2454.19918 au  
E (SMD/B3LYP\*-D3/def2-TZVP//SMD/M06-L-D3/def2-TZVP) = -2454.007214 au  
Mn -0.12523000 -0.14324000 0.09855900  
N -2.03500900 0.34197200 1.06686200  
N 2.00900200 -0.63338600 0.29447100  
O -0.87676800 -1.39325400 -1.09191200  
O 0.09181800 1.22717500 -1.14440700  
N -0.23966400 -1.50333000 1.52261000  
C 0.87649500 -2.07197900 1.99143300  
C 2.12673600 -1.35491400 1.60709900  
C 0.79960300 -3.14418000 2.85900900  
H 1.70475900 -3.61223000 3.22046300  
C -0.45415400 -3.58045200 3.26639700  
H -0.53956600 -4.41722900 3.94636200  
C -1.59517100 -2.92001700 2.83367900  
H -2.57793800 -3.20625400 3.18157800  
C -1.45528500 -1.86943800 1.94612200  
C -2.56318300 -1.01388100 1.42209000  
N 0.51907500 1.19889400 1.39464200  
C 1.80695600 1.56395900 1.34715600  
C 2.63819000 0.71765400 0.43763400  
C 2.26357400 2.60756400 2.12903700  
H 3.30602600 2.89193200 2.09470900  
C 1.36043800 3.26636400 2.95203200  
H 1.68982200 4.09950700 3.55790500  
C 0.04293700 2.83329600 3.02625300  
H -0.66717300 3.30037200 3.69461200  
C -0.34834100 1.76587300 2.24153900

C -1.65482900 1.05246400 2.33673100  
H -3.35809200 -0.93638500 2.16649800  
H -2.99297700 -1.45952100 0.52649500  
H 2.99388300 -2.01240700 1.62021100  
H 2.31282300 -0.61219000 2.38558000  
H 3.65481300 0.63439600 0.82651800  
H 2.70034700 1.17316800 -0.54996800  
H -2.45225100 1.71183200 2.67288600  
H -1.54571000 0.30219600 3.12254100  
C 2.66465700 -1.45256100 -0.83115500  
C -3.07945500 1.16514100 0.28614000  
C -4.42073500 1.15592100 1.01373700  
C -3.27048500 0.58312500 -1.10269100  
C -2.57155200 2.59448400 0.15546900  
C 2.28392300 -0.85893900 -2.17357900  
C 2.13815400 -2.87917200 -0.76076200  
C 4.18262200 -1.44948100 -0.68583800  
H -4.34292400 1.46418100 2.05553800  
H -5.08422400 1.86179300 0.51644400  
H -4.89943300 0.17866800 0.97752900  
H -2.36328800 0.65301000 -1.69468100  
H -3.59516700 -0.45557700 -1.08879800  
H -4.04769900 1.15706000 -1.60629900  
H -3.22916200 3.13244900 -0.52549400  
H -2.58038000 3.13519500 1.10077600  
H -1.56477200 2.62000500 -0.25957400  
H 1.21620400 -0.94926900 -2.35051600  
H 2.56555300 0.18814400 -2.27061000  
H 2.80770600 -1.40861500 -2.95484800  
H 2.51599600 -3.43054300 0.09886300  
H 1.04910600 -2.89758500 -0.74451100  
H 2.46634500 -3.41205800 -1.65169000  
H 4.51505600 -1.77149200 0.30040400  
H 4.59793800 -2.14752200 -1.41112600  
H 4.61195700 -0.47058400 -0.89333800  
O -0.17293700 0.92624900 -2.58177600  
H -0.84541700 1.59763100 -2.77035100  
H -0.97288200 -0.90339200 -1.92086000

**52**

E (SMD/M06-L-D3/def2-TZVP) = -2378.256883 au

H (SMD/M06-L-D3/def2-TZVP) = -2377.707536 au

G (SMD/M06-L-D3/def2-TZVP) = -2377.789472 au

E (SMD/B3LYP\*-D3/def2-TZVP//SMD/M06-L-D3/def2-TZVP) = -2377.580783 au  
Mn -0.47910300 0.22064900 -0.02293500  
N -2.38208900 0.68253400 0.96565800  
N 1.65378700 -0.27440300 0.17471900  
O -1.08595300 -0.87286700 -1.24515300  
O -0.36449200 1.37845000 -1.33146700  
N -0.59644400 -1.16568200 1.43158600  
C 0.52260400 -1.74755800 1.86241200  
C 1.77444200 -1.03671900 1.47006600  
C 0.44559900 -2.84180200 2.70537600  
H 1.34706900 -3.32985800 3.04810300  
C -0.80970100 -3.27429900 3.10761800  
H -0.89524100 -4.12641000 3.76866500  
C -1.95539500 -2.60756400 2.69580200  
H -2.93607400 -2.90776000 3.03659800  
C -1.81347000 -1.53553000 1.83488800  
C -2.91393800 -0.67695500 1.29755200  
N 0.17845600 1.53331800 1.35341900  
C 1.46303200 1.89081700 1.30501200  
C 2.28283700 1.07185000 0.35913400  
C 1.92165400 2.91400100 2.11322600  
H 2.96259200 3.20336800 2.08952700  
C 1.01343700 3.54496800 2.95226000  
H 1.34459300 4.35884500 3.58340700  
C -0.30682600 3.12324600 3.01340300  
H -1.01481600 3.58109300 3.68973300  
C -0.69863500 2.07773600 2.19656600  
C -2.01504000 1.37727600 2.25175200  
H -3.72756900 -0.60978900 2.02210200  
H -3.31884800 -1.11961200 0.38768500  
H 2.62840800 -1.71001000 1.44998500  
H 1.98836600 -0.31978900 2.26582700  
H 3.30402000 0.97725800 0.73223800  
H 2.33154200 1.56367800 -0.61228900  
H -2.81040200 2.04492000 2.57497000  
H -1.93414700 0.61957800 3.03421300  
C 2.31276500 -1.06450100 -0.97603200  
C -3.40839500 1.52511300 0.17626500  
C -4.75718800 1.51877000 0.88927800  
C -3.58983500 0.96295200 -1.22347300  
C -2.87941400 2.94883800 0.07429600  
C 1.97973000 -0.42202500 -2.31153600  
C 1.76297200 -2.48363200 -0.95659700  
C 3.82848300 -1.08842300 -0.80360600

H -4.68870800 1.80834000 1.93696400  
H -5.40674500 2.24013500 0.39611600  
H -5.24526300 0.54728600 0.82986300  
H -2.68072800 1.05132000 -1.81083800  
H -3.90794100 -0.07819300 -1.22392100  
H -4.37389100 1.53769500 -1.71522900  
H -3.51098500 3.50226900 -0.61847700  
H -2.90592400 3.47985100 1.02468400  
H -1.86215600 2.96697600 -0.31541000  
H 0.91865900 -0.48854000 -2.53275600  
H 2.28446900 0.62172900 -2.36585700  
H 2.52643500 -0.95698200 -3.08721800  
H 2.12467700 -3.06777500 -0.11173800  
H 0.67349300 -2.48465800 -0.94963000  
H 2.09094100 -2.99333900 -1.86089800  
H 4.14178400 -1.44321500 0.17722200  
H 4.24468400 -1.77152000 -1.54226000  
H 4.27471100 -0.11045000 -0.97670300

52'

E (SMD/M06-L-D3/def2-TZVP) = -2454.722166 au  
H (SMD/M06-L-D3/def2-TZVP) = -2454.146953 au  
G (SMD/M06-L-D3/def2-TZVP) = -2454.234691 au  
E (SMD/B3LYP\*-D3/def2-TZVP//SMD/M06-L-D3/def2-TZVP) = -2454.025877 au  
Mn -0.12264800 -0.08243600 0.07997600  
N -2.02989800 0.37560400 1.06053600  
N 2.00806700 -0.57885700 0.28268000  
O -0.73246900 -1.17471500 -1.14766000  
O 0.00932400 1.08842600 -1.22068600  
N -0.24728500 -1.47434500 1.52475400  
C 0.87007500 -2.05746300 1.95914200  
C 2.12329800 -1.34471500 1.57633000  
C 0.78897500 -3.15507200 2.79716800  
H 1.68906300 -3.64370300 3.14265000  
C -0.46809600 -3.59013000 3.19083700  
H -0.55658400 -4.44507200 3.84780900  
C -1.61191800 -2.92223500 2.77586000  
H -2.59429600 -3.22404900 3.11023800  
C -1.46637900 -1.84650000 1.92035600  
C -2.56406400 -0.98546300 1.38233100  
N 0.52868500 1.22350500 1.46148800  
C 1.81332600 1.58231300 1.41804100  
C 2.63660500 0.76686400 0.47267700

C 2.26824400 2.60310200 2.23112400  
H 3.30899200 2.89338100 2.21136400  
C 1.35699000 3.23029300 3.06966700  
H 1.68549400 4.04231500 3.70455600  
C 0.03703600 2.80707800 3.12549000  
H -0.67351000 3.26168400 3.80130300  
C -0.35171200 1.76428500 2.30386800  
C -1.66781200 1.06342500 2.35175400  
H -3.38081400 -0.92138600 2.10356500  
H -2.96497700 -1.42303400 0.46822300  
H 2.97783000 -2.01729300 1.55792100  
H 2.33276200 -0.63013600 2.37538000  
H 3.65626900 0.67065800 0.84934100  
H 2.68888700 1.26120800 -0.49725500  
H -2.46442000 1.72951900 2.67500800  
H -1.58976700 0.30200300 3.13087300  
C 2.67099100 -1.36636900 -0.86794600  
C -3.05227700 1.22321100 0.27118800  
C -4.40408400 1.21204200 0.97838700  
C -3.22569700 0.67037100 -1.13288800  
C -2.52282200 2.64744000 0.18008900  
C 2.34137200 -0.72170000 -2.20289600  
C 2.12125300 -2.78555500 -0.85375000  
C 4.18600300 -1.38986900 -0.68960400  
H -4.34006600 1.49357900 2.02855600  
H -5.05085400 1.93756500 0.48770200  
H -4.89230600 0.24129100 0.90917200  
H -2.31603300 0.76982700 -1.71778900  
H -3.53592800 -0.37323500 -1.14329200  
H -4.01213000 1.24340400 -1.62297700  
H -3.15096500 3.20444900 -0.51292100  
H -2.55409600 3.17330200 1.13318900  
H -1.50369400 2.66790100 -0.20471000  
H 1.28226900 -0.79519700 -2.43171800  
H 2.63835500 0.32466200 -2.25283500  
H 2.89610000 -1.25035800 -2.97729700  
H 2.48066300 -3.37238600 -0.00976300  
H 1.03170500 -2.78683200 -0.84983400  
H 2.45147600 -3.29237900 -1.75884800  
H 4.49573600 -1.74454700 0.29240800  
H 4.60476800 -2.07295400 -1.42680200  
H 4.63251200 -0.41179200 -0.86132100  
O -0.82577900 0.03625800 -3.74781700  
H -0.96807400 -0.67879700 -3.10614600

H -0.46058700 0.71228700 -3.15352200

**<sup>5</sup>TS<sub>2-8</sub>**

E (SMD/M06-L-D3/def2-TZVP) = -2454.694841 au

H (SMD/M06-L-D3/def2-TZVP) = -2454.124246 au

G (SMD/M06-L-D3/def2-TZVP) = -2454.210762 au

E (SMD/B3LYP\*-D3/def2-TZVP//SMD/M06-L-D3/def2-TZVP) = -2453.998003 au

Mn -0.17130200 -0.14392000 0.04618100

N -2.06784500 0.33484700 1.09465900

N 1.98607500 -0.61729200 0.26611000

O -0.84373900 -1.27678000 -1.12223500

O 0.06611400 1.20578800 -1.15422700

N -0.26342000 -1.49698100 1.53284000

C 0.86355300 -2.05720400 1.97622600

C 2.10536000 -1.33425300 1.58457600

C 0.80096300 -3.14079300 2.83333500

H 1.71035400 -3.60923000 3.18208700

C -0.44699400 -3.58701200 3.24099000

H -0.52085100 -4.43189200 3.91254200

C -1.60022500 -2.93741900 2.82454500

H -2.57683900 -3.24016200 3.17440400

C -1.47464200 -1.87425900 1.95109800

C -2.58828900 -1.02564300 1.43227400

N 0.50169600 1.19515200 1.40692100

C 1.77813700 1.57892100 1.31929600

C 2.60568100 0.73663300 0.40389100

C 2.23064200 2.64226800 2.07690800

H 3.26487100 2.95015200 2.01897300

C 1.32803300 3.28643500 2.91103600

H 1.65440900 4.13163400 3.50215000

C 0.02019200 2.83625600 3.02030100

H -0.68286200 3.30182100 3.69640100

C -0.36706100 1.75403600 2.25236500

C -1.66254300 1.02674000 2.36689200

H -3.38583600 -0.96104900 2.17461400

H -3.01089700 -1.46845900 0.53092100

H 2.97387200 -1.98902700 1.59616900

H 2.29140000 -0.58916900 2.36121800

H 3.62330500 0.65583100 0.79013800

H 2.66335300 1.19540200 -0.58211100

H -2.45857100 1.67366200 2.72868500

H -1.52811200 0.26673500 3.13948500

C 2.65198100 -1.44311400 -0.85291300

C -3.11595800 1.18075800 0.33884800  
C -4.44818400 1.15161000 1.08192600  
C -3.31188100 0.63427800 -1.06185800  
C -2.60399100 2.61077600 0.24065000  
C 2.29590200 -0.85599000 -2.20458900  
C 2.11871600 -2.86655500 -0.78201000  
C 4.16828300 -1.43920700 -0.68497100  
H -4.35836100 1.42312000 2.13290300  
H -5.11147200 1.87796900 0.61516100  
H -4.93180300 0.17853400 1.01500700  
H -2.41817300 0.76253300 -1.66374900  
H -3.59631400 -0.41653900 -1.07439700  
H -4.12115900 1.19271800 -1.53111200  
H -3.25637900 3.16196300 -0.43432500  
H -2.61599400 3.13443700 1.19539200  
H -1.59603200 2.64283000 -0.17210500  
H 1.23779500 -0.98592500 -2.40660900  
H 2.54830400 0.19885000 -2.29633100  
H 2.85541100 -1.39259700 -2.96946100  
H 2.48921600 -3.41850700 0.08029300  
H 1.02907200 -2.87944300 -0.77205400  
H 2.44879200 -3.40207200 -1.67037800  
H 4.48902500 -1.75035700 0.30812000  
H 4.58907300 -2.14670300 -1.39749700  
H 4.60070400 -0.46350900 -0.89994500  
O -0.86505800 0.08222200 -3.14942500  
H 0.00010200 -0.01426300 -3.56546500  
H -0.86289700 -0.70215500 -2.09821700

**58**

E (SMD/M06-L-D3/def2-TZVP) = -2454.701941 au  
H (SMD/M06-L-D3/def2-TZVP) = -2454.126544 au  
G (SMD/M06-L-D3/def2-TZVP) = -2454.213421 au  
E (SMD/B3LYP\*-D3/def2-TZVP//SMD/M06-L-D3/def2-TZVP) = -2454.002251 au  
Mn -0.16311900 -0.13182200 0.04246100  
N -2.06596600 0.33513100 1.09634400  
N 1.98223400 -0.62677700 0.26873800  
O -0.89290100 -1.39466600 -1.05566900  
O 0.05741100 1.15499400 -1.14827800  
N -0.25833600 -1.49665600 1.54758800  
C 0.86631100 -2.06292200 1.98603700  
C 2.10915700 -1.34481800 1.58544700  
C 0.80441100 -3.14536700 2.84477300

H 1.71291100 -3.61741900 3.19119400  
C -0.44426500 -3.58574900 3.25754000  
H -0.51911800 -4.42897100 3.93116800  
C -1.59657300 -2.93356500 2.84257100  
H -2.57314000 -3.23434900 3.19449100  
C -1.46838600 -1.87105600 1.96773200  
C -2.58299700 -1.02316400 1.44726500  
N 0.50633700 1.18111900 1.41767300  
C 1.78312900 1.56372700 1.32624400  
C 2.60669600 0.72448800 0.40523500  
C 2.23646000 2.63090100 2.07735300  
H 3.27109500 2.93690600 2.01652400  
C 1.33432200 3.28402200 2.90517600  
H 1.66145200 4.13362400 3.48947900  
C 0.02513800 2.83948400 3.01272600  
H -0.68049400 3.31530800 3.67893300  
C -0.36365800 1.75068000 2.25394600  
C -1.66721700 1.03915200 2.36375800  
H -3.37689100 -0.95046300 2.19291700  
H -3.01071600 -1.47337600 0.55267500  
H 2.97633800 -2.00153200 1.58893500  
H 2.30392100 -0.60051200 2.36064700  
H 3.62648800 0.64188400 0.78541000  
H 2.65690200 1.18691100 -0.57974300  
H -2.45892000 1.70137800 2.70690400  
H -1.55189100 0.28822500 3.14838900  
C 2.63151100 -1.45429900 -0.85861800  
C -3.11346300 1.16524300 0.32451800  
C -4.44591200 1.15570800 1.06806100  
C -3.31388400 0.58520100 -1.06325400  
C -2.59731600 2.59097500 0.19564000  
C 2.23742500 -0.88222400 -2.20685000  
C 2.11790300 -2.88422700 -0.76847600  
C 4.15036300 -1.43363700 -0.72069200  
H -4.35691100 1.46057000 2.10990500  
H -5.11145400 1.86507400 0.57884300  
H -4.92681100 0.17961400 1.03224600  
H -2.41060200 0.66430200 -1.66083600  
H -3.63567700 -0.45472700 -1.04721600  
H -4.09960500 1.15659000 -1.55631000  
H -3.25145900 3.13296700 -0.48505600  
H -2.60147400 3.13133100 1.14123200  
H -1.59105900 2.60905100 -0.22244400  
H 1.17878800 -1.03914000 -2.39375000

H 2.46113600 0.17885700 -2.30529000  
H 2.79857800 -1.40729500 -2.97874500  
H 2.51580500 -3.42772600 0.08685900  
H 1.02940000 -2.91192700 -0.73424800  
H 2.43495700 -3.41863600 -1.66228500  
H 4.49042000 -1.73362800 0.26971000  
H 4.56549800 -2.14289600 -1.43477200  
H 4.56927200 -0.45542200 -0.95063700  
O -0.73382400 0.40219900 -3.18905700  
H 0.21499000 0.45395900 -3.36677100  
H -0.92368000 -0.93772700 -1.92494100

**<sup>5</sup>TS<sub>8-9</sub>**

E (SMD/M06-L-D3/def2-TZVP) = -2454.694316 au  
H (SMD/M06-L-D3/def2-TZVP) = -2454.120273 au  
G (SMD/M06-L-D3/def2-TZVP) = -2454.207125 au  
E (SMD/B3LYP\*-D3/def2-TZVP//SMD/M06-L-D3/def2-TZVP) = -2453.998547 au  
Mn -0.16742800 -0.07582200 -0.01075100  
N -2.08752500 0.38445800 1.15077300  
N 2.10426100 -0.62928100 0.34156600  
O -0.89239600 -1.34087000 -1.11811500  
O 0.07894700 1.25206000 -1.16140400  
N -0.25098100 -1.48381100 1.51659700  
C 0.86144000 -2.06919700 1.96567200  
C 2.14085100 -1.37167200 1.62926700  
C 0.77845700 -3.16709000 2.80482700  
H 1.68082200 -3.65041400 3.15276500  
C -0.47545800 -3.60598700 3.19903400  
H -0.56499700 -4.46152100 3.85525000  
C -1.61359300 -2.92725600 2.79063300  
H -2.59718400 -3.21574200 3.13387900  
C -1.46523400 -1.85036500 1.93604700  
C -2.58757700 -0.98166400 1.45861500  
N 0.53564800 1.19020300 1.45356800  
C 1.82455200 1.54578400 1.42001500  
C 2.69305700 0.71835400 0.52445800  
C 2.27907500 2.58078200 2.21659200  
H 3.32320000 2.85952700 2.19560000  
C 1.37263800 3.23133900 3.03954600  
H 1.70149500 4.05653800 3.65709900  
C 0.05590800 2.80319900 3.10422400  
H -0.65613000 3.26350900 3.77492400  
C -0.33433300 1.74626400 2.30182200

C -1.65360300 1.05466000 2.41095500  
H -3.37068800 -0.94894900 2.21995300  
H -3.03054900 -1.40226100 0.55666400  
H 2.98413700 -2.06050800 1.67175300  
H 2.31653600 -0.65486600 2.43558600  
H 3.69820100 0.66209700 0.95126900  
H 2.78399800 1.19669200 -0.45072800  
H -2.42160300 1.72908500 2.78641400  
H -1.53706600 0.28989400 3.18259200  
C 2.76128500 -1.42138200 -0.78467800  
C -3.11785800 1.23175300 0.39540100  
C -4.45331800 1.22761800 1.13321600  
C -3.31660800 0.67609200 -1.00415200  
C -2.58528000 2.65337700 0.28630800  
C 2.41109700 -0.78825800 -2.11961000  
C 2.20574700 -2.83923600 -0.76698300  
C 4.27589500 -1.45020500 -0.60746900  
H -4.35994200 1.53316800 2.17481200  
H -5.12105900 1.93575000 0.64495900  
H -4.93252400 0.25032600 1.10065300  
H -2.39407800 0.71600400 -1.57842900  
H -3.68244900 -0.34923300 -1.00769000  
H -4.06243000 1.28613300 -1.51212900  
H -3.23376100 3.21695500 -0.38222600  
H -2.57587000 3.17744500 1.24095200  
H -1.57930000 2.66434300 -0.13447700  
H 1.34133500 -0.84204400 -2.30701300  
H 2.72142800 0.25314700 -2.19247500  
H 2.92447200 -1.33481100 -2.90985200  
H 2.54265500 -3.41889000 0.09119300  
H 1.11570500 -2.83471700 -0.78422300  
H 2.55006100 -3.35900200 -1.65946500  
H 4.57287500 -1.81647500 0.37507900  
H 4.70464100 -2.12248100 -1.34920800  
H 4.72193100 -0.46816600 -0.75881000  
O -0.30130000 0.77505400 -3.04707100  
H -1.03798200 1.40215600 -3.01621200  
H -0.89685100 -0.87348800 -1.97496400

**59**

E (SMD/M06-L-D3/def2-TZVP) = -2454.732535 au  
H (SMD/M06-L-D3/def2-TZVP) = -2454.155731 au  
G (SMD/M06-L-D3/def2-TZVP) = -2454.244143 au

E (SMD/B3LYP\*-D3/def2-TZVP//SMD/M06-L-D3/def2-TZVP) = -2454.042699 au  
Mn -0.18412900 -0.14738900 -0.13541000  
N -2.18637100 0.39477000 1.14794800  
N 2.15845800 -0.67773300 0.29781700  
O -0.87195900 -1.47751000 -1.27980800  
O 0.11916600 1.28325400 -1.36311100  
N -0.27211300 -1.48072900 1.46068400  
C 0.84421200 -2.06962200 1.90955200  
C 2.14572400 -1.39502700 1.58605900  
C 0.76226600 -3.15898000 2.75983200  
H 1.66810400 -3.64235900 3.09944500  
C -0.48680500 -3.58766000 3.17784800  
H -0.57342000 -4.43932600 3.83966700  
C -1.62075700 -2.89547300 2.78679000  
H -2.60147600 -3.16515600 3.15349600  
C -1.48236400 -1.82724400 1.91722200  
C -2.63547100 -0.96816500 1.48306200  
N 0.49975700 1.18198500 1.32458600  
C 1.79570700 1.52422500 1.30905500  
C 2.70331000 0.67977600 0.46391300  
C 2.25501800 2.56993100 2.09088400  
H 3.30401400 2.83099400 2.07288300  
C 1.35463700 3.24767800 2.89519200  
H 1.68748400 4.08063300 3.50035300  
C 0.03792100 2.82429100 2.96098700  
H -0.67353100 3.29265600 3.62728100  
C -0.36189600 1.75745700 2.17491100  
C -1.69520700 1.09296000 2.34811100  
H -3.38954400 -0.97763900 2.27738100  
H -3.10449700 -1.40973400 0.60289500  
H 2.97179000 -2.10184100 1.67917000  
H 2.30629100 -0.66990800 2.38936700  
H 3.69746800 0.67868000 0.92333700  
H 2.81548400 1.13642600 -0.52010600  
H -2.42233800 1.80343400 2.74458000  
H -1.55619700 0.35953900 3.14775600  
C 2.83689200 -1.46517000 -0.80329400  
C -3.21586300 1.20265800 0.38673900  
C -4.54333000 1.25298800 1.13483500  
C -3.42205500 0.58429700 -0.98741100  
C -2.67095300 2.61239300 0.19120800  
C 2.48658900 -0.84377300 -2.14710000  
C 2.29470500 -2.88918900 -0.78528000  
C 4.34983200 -1.48406300 -0.61485900

H -4.42837700 1.63806700 2.14847000  
H -5.23315900 1.91360400 0.61081200  
H -5.01160400 0.27078800 1.19346600  
H -2.48046100 0.52679400 -1.53228100  
H -3.84914100 -0.41664400 -0.94495900  
H -4.11219500 1.20486900 -1.55776100  
H -3.33864300 3.16144300 -0.47093700  
H -2.60793000 3.17619400 1.12119600  
H -1.68307400 2.58873500 -0.27134100  
H 1.41153100 -0.87601400 -2.31879600  
H 2.81886700 0.18952800 -2.23894800  
H 2.97559100 -1.41025400 -2.93902100  
H 2.62626100 -3.45794400 0.08257000  
H 1.20468200 -2.89504700 -0.81215600  
H 2.65281300 -3.41488300 -1.66909100  
H 4.63352500 -1.85005400 0.37247800  
H 4.80141400 -2.14740400 -1.35165600  
H 4.78815900 -0.49596400 -0.75228000  
O -0.26084300 0.99056000 -2.72567100  
H -1.10553000 1.46193300 -2.79923200  
H -0.93578100 -1.04504300 -2.14349800

### <sup>3</sup>TS<sub>2-3</sub>

E (SMD/M06-L-D3/def2-TZVP) = -2378.202578 au  
H (SMD/M06-L-D3/def2-TZVP) = -2377.65482 au  
G (SMD/M06-L-D3/def2-TZVP) = -2377.736265 au  
E (SMD/B3LYP\*-D3/def2-TZVP//SMD/M06-L-D3/def2-TZVP) = -2377.534201 au  
Mn 0.00957100 -0.01389000 0.71296700  
N 2.08025800 -0.41927600 0.11266400  
N -2.06793500 0.43163600 0.16921800  
O -0.16716100 -1.09348500 2.27302800  
O 0.13205700 0.59782500 2.34045100  
N -0.20707600 -1.33839000 -0.74669300  
C -1.37110900 -1.39923800 -1.39962000  
C -2.24915700 -0.21311100 -1.18164800  
C -1.61438600 -2.43190300 -2.28429500  
H -2.56119900 -2.49059500 -2.80260300  
C -0.60985100 -3.36590800 -2.50223000  
H -0.77601900 -4.18212100 -3.19224900  
C 0.61709700 -3.23940100 -1.86702400  
H 1.42648600 -3.92881700 -2.06151700  
C 0.79199200 -2.19729200 -0.97581900  
C 2.04635100 -1.87752600 -0.22707100

N 0.21216200 1.44054000 -0.58689600  
C -0.79729000 2.30947100 -0.74590700  
C -2.03539500 1.91979800 -0.01012300  
C -0.63707400 3.41861500 -1.55180200  
H -1.45570900 4.11222100 -1.68308400  
C 0.58368900 3.61010200 -2.18501800  
H 0.73911000 4.48191600 -2.80565200  
C 1.59230600 2.66461500 -2.05326200  
H 2.53311000 2.76798800 -2.57587000  
C 1.36645900 1.55996400 -1.25625400  
C 2.25566800 0.36714900 -1.16155800  
H 2.92113000 -2.16191500 -0.81497500  
H 2.07809000 -2.44556000 0.70214400  
H -3.29408300 -0.45040600 -1.36498800  
H -1.97743900 0.52002300 -1.94366100  
H -2.92121000 2.27131300 -0.54179200  
H -2.04027400 2.37831200 0.97917800  
H 3.29801800 0.63703000 -1.31122600  
H 1.99954600 -0.28689000 -1.99738100  
C -3.20753600 -0.00167000 1.11871900  
C 3.21722300 -0.08684500 1.10279300  
C 4.56187200 -0.56625600 0.56198300  
C 2.97645900 -0.76065400 2.44315900  
C 3.23357500 1.42235100 1.29477800  
C -2.94284800 0.48533900 2.53342400  
C -3.26396900 -1.52267900 1.11982400  
C -4.54158700 0.57575500 0.65142800  
H 4.79986000 -0.17493400 -0.42551700  
H 5.34071300 -0.22024900 1.23974000  
H 4.62149200 -1.65298700 0.52746100  
H 2.05621600 -0.41927100 2.90484900  
H 2.95473300 -1.84669700 2.37083700  
H 3.80813000 -0.50391400 3.09798900  
H 3.92592200 1.66628300 2.09857800  
H 3.57118600 1.95758100 0.40799500  
H 2.24851900 1.79414700 1.57768100  
H -2.06395200 0.01305300 2.95926200  
H -2.82975000 1.56633700 2.59510000  
H -3.80674900 0.22112900 3.14210300  
H -3.63442100 -1.93444700 0.18193200  
H -2.28587800 -1.95270700 1.33476200  
H -3.94851900 -1.84463000 1.90270700  
H -4.77128200 0.35414500 -0.38943900  
H -5.33178500 0.13336700 1.25593400

H -4.59036200 1.65424900 0.79354900

**33**

E (SMD/M06-L-D3/def2-TZVP) = -2378.218702 au

H (SMD/M06-L-D3/def2-TZVP) = -2377.669552 au

G (SMD/M06-L-D3/def2-TZVP) = -2377.752494 au

E (SMD/B3LYP\*-D3/def2-TZVP//SMD/M06-L-D3/def2-TZVP) = -2377.555927 au

Mn -0.46856200 0.21935600 0.01288100

N -2.39988600 0.66301400 0.97965200

N 1.66666900 -0.25016800 0.17828600

O -0.90212800 -0.47269900 -1.65697200

O -0.67131100 0.96123900 -1.67605100

N -0.59161000 -1.17341300 1.38663400

C 0.53202200 -1.73798300 1.84925100

C 1.77873800 -1.01149200 1.47286400

C 0.46570000 -2.82071100 2.70200800

H 1.37613800 -3.28338900 3.05702000

C -0.78358400 -3.27696400 3.10633800

H -0.85866500 -4.12401300 3.77447900

C -1.93144600 -2.62163200 2.68488400

H -2.91097100 -2.92208400 3.02987400

C -1.80440100 -1.55562200 1.81511500

C -2.91577600 -0.70801900 1.29139700

N 0.15126100 1.54621900 1.31676500

C 1.44254500 1.91275500 1.29548000

C 2.27568300 1.10796400 0.35412300

C 1.89411600 2.92257500 2.12286400

H 2.93623200 3.20941800 2.10360600

C 0.98988400 3.53790400 2.97660000

H 1.31646500 4.34105700 3.62296100

C -0.32624300 3.09423300 3.03120300

H -1.03628700 3.52192000 3.72543100

C -0.71566700 2.06739400 2.19552300

C -2.02186500 1.35117600 2.26305900

H -3.73838600 -0.67076700 2.00850000

H -3.30361800 -1.13688700 0.36751000

H 2.63514800 -1.68079200 1.45983700

H 1.98010600 -0.29282200 2.26975000

H 3.30337500 1.03994100 0.71590300

H 2.30165400 1.59011500 -0.62289200

H -2.81538800 2.01238100 2.60283600

H -1.92572200 0.58862700 3.03852500

C 2.34901200 -1.03577600 -0.96077800

C -3.43739500 1.50207000 0.20943500  
C -4.73302900 1.64716500 1.00430500  
C -3.77500800 0.83885500 -1.11672500  
C -2.82230200 2.87124900 -0.03741700  
C 2.17726200 -0.30974100 -2.28599900  
C 1.68913800 -2.40478600 -1.03033900  
C 3.84626000 -1.19136300 -0.70400700  
H -4.60403600 2.14065100 1.96554400  
H -5.41696700 2.26202900 0.42097000  
H -5.22187100 0.68815000 1.16844100  
H -2.88741000 0.61925800 -1.69992400  
H -4.35138000 -0.07587000 -0.98715500  
H -4.39903700 1.52545700 -1.68704600  
H -3.49360300 3.45301000 -0.66669200  
H -2.67837000 3.43511100 0.88388900  
H -1.86534000 2.78677600 -0.55086500  
H 1.13592600 -0.10733700 -2.50952200  
H 2.73743700 0.62310100 -2.32402800  
H 2.57830900 -0.94856300 -3.07161800  
H 1.91099200 -3.01850900 -0.15770100  
H 0.60843400 -2.31805200 -1.13372500  
H 2.06975800 -2.93696900 -1.90040700  
H 4.08230600 -1.71396200 0.22088100  
H 4.26492500 -1.78191000 -1.51768100  
H 4.36265600 -0.23287900 -0.70291800

### <sup>5</sup>TS<sub>2-3</sub>

E (SMD/M06-L-D3/def2-TZVP) = -2378.22093 au  
H (SMD/M06-L-D3/def2-TZVP) = -2377.675916 au  
G (SMD/M06-L-D3/def2-TZVP) = -2377.760278 au  
E (SMD/B3LYP\*-D3/def2-TZVP//SMD/M06-L-D3/def2-TZVP) = -2377.54715 au  
Mn -0.02510500 -0.02051400 0.94567300  
N 0.15434500 -1.31850900 -0.69241700  
N 2.22237900 0.39854600 0.09312100  
N -0.19547500 1.43409100 -0.53136700  
N -2.25849200 -0.37931600 0.03567000  
O -0.04182300 0.69243800 2.54868500  
O 0.19945500 -1.32072100 2.26048400  
C -0.87872300 -2.12709300 -0.97328700  
C -0.73834700 -3.15324400 -1.89052100  
C 0.48323700 -3.32402900 -2.51978900  
C 1.50943200 -2.42530600 -2.28305400  
C 1.30456300 -1.40287800 -1.37307500

C 2.26077300 -0.25837400 -1.22631200  
C 2.12349500 1.86608300 -0.03946800  
C 0.85218700 2.25034500 -0.72965700  
C 0.74321200 3.33682600 -1.57692400  
C -0.46159400 3.55912400 -2.22460500  
C -1.49995400 2.65785200 -2.07275800  
C -1.32870200 1.57255000 -1.22904900  
C -2.31672000 0.44463100 -1.18308300  
C -2.17500800 -1.81256400 -0.28908200  
C -3.35847800 -0.03244600 1.01797700  
C -4.73283200 -0.39892800 0.46650900  
C -3.13514500 -0.76958500 2.33042700  
C -3.27537300 1.46352400 1.29165400  
C 3.36448600 -0.05221300 0.98426900  
C 4.69986100 0.48387700 0.47314100  
C 3.38312200 -1.57588500 0.99558900  
C 3.14420900 0.43560900 2.40758900  
H 3.10574200 1.52094300 2.48474800  
H 2.22959000 0.02316700 2.82871800  
H 3.98073800 0.10325500 3.02113300  
H -1.58152100 -3.79331800 -2.10989900  
H 0.62220100 -4.13327700 -3.22438900  
H 2.45213200 -2.49211400 -2.80847000  
H 3.26753500 -0.57081100 -1.50454400  
H 1.96953000 0.46860600 -1.98971200  
H 2.96685900 2.29254000 -0.59102400  
H 2.14188100 2.30496200 0.95889900  
H 1.59631600 3.98217700 -1.73219600  
H -0.57563200 4.41298400 -2.87922500  
H -2.42872700 2.76960400 -2.61511300  
H -3.31955800 0.82825200 -1.37474900  
H -2.08876900 -0.18497000 -2.04801400  
H -2.99990900 -2.14913900 -0.92567400  
H -2.23796500 -2.38490300 0.63676500  
H -5.50026200 -0.09558600 1.17769000  
H -4.95195400 0.09843800 -0.47782300  
H -4.83018700 -1.47419800 0.31823200  
H -3.27326900 -1.84604400 2.24152500  
H -2.14031200 -0.57601700 2.72719500  
H -3.86674700 -0.41631100 3.05593300  
H -3.98189500 1.72642800 2.07713700  
H -2.27520400 1.73853900 1.63332600  
H -3.52384300 2.06904900 0.42054600  
H 5.50869200 0.04977400 1.05926200

H 4.87880700 0.22543200 -0.57028800  
H 4.76636500 1.56650900 0.57503900  
H 4.08962200 -1.91646700 1.75076200  
H 2.40113000 -1.97703700 1.25053000  
H 3.69967500 -2.00230800 0.04450900

<sup>5</sup>3

E (SMD/M06-L-D3/def2-TZVP) = -2378.268444 au  
H (SMD/M06-L-D3/def2-TZVP) = -2377.719884 au  
G (SMD/M06-L-D3/def2-TZVP) = -2377.805278 au  
E (SMD/B3LYP\*-D3/def2-TZVP//SMD/M06-L-D3/def2-TZVP) = -2377.598553 au  
Mn -0.54190400 0.22913900 -0.28011700  
N -2.54560300 0.71598500 1.00914300  
N 1.82060700 -0.29778300 0.15674900  
O -0.99251700 -0.46962700 -1.97094800  
O -0.72103900 0.93189300 -2.01636300  
N -0.60587400 -1.14324500 1.32007300  
C 0.51662800 -1.69598200 1.79141900  
C 1.81857100 -1.03729600 1.43399400  
C 0.45156500 -2.74734900 2.69199200  
H 1.36428300 -3.20374400 3.05012700  
C -0.78931500 -3.17224800 3.13436600  
H -0.86250500 -3.99341700 3.83528900  
C -1.93464000 -2.51392300 2.71504800  
H -2.91063800 -2.78012800 3.09642800  
C -1.81023700 -1.48687600 1.79732100  
C -2.96869600 -0.66522000 1.31248100  
N 0.13444700 1.54676500 1.21729600  
C 1.43873600 1.85793900 1.25328900  
C 2.32613400 1.07627600 0.33193500  
C 1.91278600 2.80620700 2.14092900  
H 2.96771400 3.04164200 2.16273400  
C 1.01640700 3.41931000 3.00218000  
H 1.36030700 4.17628900 3.69467400  
C -0.30829900 3.02068300 3.01150800  
H -1.01599600 3.43160700 3.71856700  
C -0.72100500 2.04683400 2.11550900  
C -2.07175000 1.40160000 2.22716000  
H -3.76820900 -0.70823100 2.05953700  
H -3.36412100 -1.11235400 0.39915200  
H 2.62240900 -1.77214300 1.48557200  
H 2.02949900 -0.33769500 2.24839400  
H 3.34970200 1.10653400 0.72006300

H 2.34224300 1.56215300 -0.64472500  
H -2.79419400 2.12825700 2.59920800  
H -1.97998000 0.66748300 3.03321600  
C 2.52026300 -1.06447400 -0.94422900  
C -3.59356300 1.52588500 0.27442800  
C -4.87470200 1.67147000 1.09049200  
C -3.92623100 0.85438700 -1.04986000  
C -2.99072000 2.89491800 -0.01371200  
C 2.36443000 -0.32190400 -2.26370100  
C 1.83766400 -2.42122900 -1.05971700  
C 4.00782700 -1.24594000 -0.65449500  
H -4.71282800 2.15741200 2.05208000  
H -5.58537100 2.28365600 0.53624100  
H -5.34781000 0.70632300 1.27023000  
H -3.02682500 0.65906100 -1.62998700  
H -4.47297600 -0.07864200 -0.92141800  
H -4.56678600 1.51926000 -1.62800200  
H -3.67858700 3.47170600 -0.62988600  
H -2.80745100 3.47336900 0.89139800  
H -2.05017300 2.79829000 -0.55887500  
H 1.32468700 -0.06606400 -2.45667200  
H 2.96169100 0.58814300 -2.30225200  
H 2.71423700 -0.96340300 -3.07149700  
H 1.99166000 -3.04381300 -0.17852900  
H 0.76435700 -2.30457200 -1.21755800  
H 2.24700200 -2.96263500 -1.91120200  
H 4.19559000 -1.79605300 0.26691400  
H 4.46531700 -1.81107700 -1.46593200  
H 4.52467000 -0.28840600 -0.59329000

**32''**

E (SMD/M06-L-D3/def2-TZVP) = -2454.233732 au  
H (SMD/M06-L-D3/def2-TZVP) = -2453.669913 au  
G (SMD/M06-L-D3/def2-TZVP) = -2453.757842 au  
E (SMD/B3LYP\*-D3/def2-TZVP//SMD/M06-L-D3/def2-TZVP) = -2453.543131 au  
Mn -0.15219900 -0.15540900 -0.02147500  
N -2.06872300 0.35175900 1.09776500  
N 1.98817600 -0.64809300 0.26594900  
O -0.81071700 -1.39399800 -0.88901600  
O 0.12419200 1.12520900 -1.03057600  
N -0.24418600 -1.45166800 1.60872100  
C 0.87139700 -2.04262300 2.02600300  
C 2.12859800 -1.38636800 1.57146400

C 0.80383500 -3.11446300 2.90057500  
H 1.70913800 -3.60494800 3.22998300  
C -0.44408100 -3.52165500 3.34511400  
H -0.52422800 -4.35257300 4.03334400  
C -1.59022500 -2.85959600 2.92819900  
H -2.56900000 -3.14532000 3.28710200  
C -1.45552700 -1.81554200 2.03167200  
C -2.57382300 -1.00038300 1.46512000  
N 0.52028300 1.12740900 1.48628600  
C 1.79509100 1.50858200 1.39472800  
C 2.61103700 0.69785600 0.43912800  
C 2.25764900 2.57082300 2.14909500  
H 3.29415900 2.87135700 2.08797100  
C 1.35735300 3.23479000 2.97030400  
H 1.68876600 4.08182800 3.55612500  
C 0.03983900 2.81284600 3.05439200  
H -0.67229500 3.30927500 3.69878300  
C -0.35221100 1.72375300 2.29348700  
C -1.68760700 1.06615200 2.36219000  
H -3.39200600 -0.93044700 2.18525100  
H -2.96160300 -1.48473800 0.56906500  
H 2.95423200 -2.09293800 1.52687600  
H 2.40677400 -0.66519500 2.34286200  
H 3.63611500 0.60349900 0.80246400  
H 2.64690600 1.19496700 -0.52960200  
H -2.46132400 1.77101800 2.65955200  
H -1.64051600 0.33141700 3.16897400  
C 2.62869200 -1.44661100 -0.88499800  
C -3.09215900 1.16575500 0.29341600  
C -4.44541400 1.17082000 0.99763600  
C -3.24929900 0.56588200 -1.09249000  
C -2.57017600 2.58939200 0.15428000  
C 2.23411100 -0.82934000 -2.21440600  
C 2.10590500 -2.87510400 -0.82865600  
C 4.14827200 -1.44163400 -0.75383700  
H -4.38013500 1.49795900 2.03491400  
H -5.10218000 1.86700400 0.47831700  
H -4.92223100 0.19212100 0.97298400  
H -2.32707700 0.63758000 -1.66687100  
H -3.56200300 -0.47691300 -1.07022700  
H -4.02140300 1.12335400 -1.62163800  
H -3.19740500 3.11993100 -0.56012300  
H -2.60508800 3.14860200 1.08818700  
H -1.54900000 2.59693100 -0.22602800

H 1.16533700 -0.92435600 -2.39642200  
H 2.50558400 0.22234200 -2.29118100  
H 2.76088700 -1.35948700 -3.00714200  
H 2.50970700 -3.44235700 0.00855300  
H 1.01773200 -2.89430200 -0.77938100  
H 2.40850800 -3.38934000 -1.73916000  
H 4.48909800 -1.77727500 0.22508500  
H 4.55736400 -2.12888300 -1.49263000  
H 4.57336300 -0.45887600 -0.95118300  
O -0.79368500 0.14275000 -3.81060400  
H -0.44990600 0.54106500 -3.00137600

**<sup>3</sup>TS<sub>2-14</sub>**

E (SMD/M06-L-D3/def2-TZVP) = -2454.182205 au  
H (SMD/M06-L-D3/def2-TZVP) = -2453.620098 au  
G (SMD/M06-L-D3/def2-TZVP) = -2453.706492 au  
E (SMD/B3LYP\*-D3/def2-TZVP//SMD/M06-L-D3/def2-TZVP) = -2453.500389 au  
Mn -0.08366600 -0.16991700 -0.04747000  
N -2.12218800 0.35288500 1.06537400  
N 2.04241300 -0.63144000 0.24943800  
O -0.69512200 -1.28155600 -1.25839900  
O 0.31886600 1.16731300 -1.29787800  
N -0.26857700 -1.49463600 1.47252500  
C 0.84665000 -2.06203800 1.93572100  
C 2.11247700 -1.36481700 1.55863100  
C 0.77640700 -3.13646600 2.80647700  
H 1.68184100 -3.61004900 3.16032000  
C -0.47467200 -3.56643000 3.22281400  
H -0.55765800 -4.40266200 3.90453100  
C -1.61742700 -2.90472200 2.79835800  
H -2.59784800 -3.18982600 3.15427900  
C -1.47846600 -1.85454000 1.90745500  
C -2.60022100 -1.01625800 1.38235300  
N 0.51605000 1.16291900 1.39067500  
C 1.79693100 1.54117500 1.35118100  
C 2.65044300 0.71644200 0.43754100  
C 2.24488000 2.59000500 2.13143500  
H 3.28437600 2.88600000 2.10373800  
C 1.32651000 3.24401900 2.94472400  
H 1.64400700 4.08298800 3.54980200  
C 0.01349200 2.80619000 3.00541200  
H -0.70716700 3.27872300 3.65904600  
C -0.36309500 1.72680700 2.21993800

C -1.68690500 1.03801600 2.31880700  
H -3.42283600 -1.01139100 2.10391900  
H -2.97781700 -1.46370200 0.46216000  
H 2.96165300 -2.04483400 1.59118100  
H 2.30348100 -0.63244500 2.34670000  
H 3.66166300 0.64469100 0.84655000  
H 2.72382000 1.19769100 -0.53750500  
H -2.44459600 1.73058800 2.68199700  
H -1.58929700 0.28559300 3.10612200  
C 2.76478100 -1.43340900 -0.84574400  
C -3.18060700 1.17767700 0.34247900  
C -4.44944500 1.35486300 1.17512800  
C -3.56460900 0.49042800 -0.95930900  
C -2.56617100 2.53714700 0.04220800  
C 2.47192900 -0.83660200 -2.21229000  
C 2.24680500 -2.86586800 -0.81599600  
C 4.27412400 -1.42819400 -0.61788700  
H -4.28215500 1.88471700 2.11158000  
H -5.16113700 1.94517600 0.59870800  
H -4.92787300 0.40197700 1.39838000  
H -2.68733500 0.19503700 -1.52800900  
H -4.18486100 -0.38973900 -0.79403600  
H -4.14869700 1.18336100 -1.56382800  
H -3.24765000 3.11348000 -0.58192100  
H -2.39064100 3.11880200 0.94749100  
H -1.62045100 2.43036000 -0.48916600  
H 1.41512400 -0.91264200 -2.45877500  
H 2.77336000 0.20664800 -2.28944200  
H 3.04216200 -1.39426900 -2.95513500  
H 2.59699100 -3.42576100 0.05019100  
H 1.15750800 -2.89163400 -0.83714800  
H 2.61076700 -3.38618800 -1.70056700  
H 4.55283600 -1.74180500 0.38774700  
H 4.73256800 -2.12941100 -1.31376400  
H 4.71294500 -0.44958000 -0.80680300  
O -0.66721500 1.13808000 -2.54061300  
H -0.86364300 0.17874000 -2.42350700

**<sup>3</sup>14**

E (SMD/M06-L-D3/def2-TZVP) = -2454.186696 au

H (SMD/M06-L-D3/def2-TZVP) = -2453.622922 au

G (SMD/M06-L-D3/def2-TZVP) = -2453.706863 au

E (SMD/B3LYP\*-D3/def2-TZVP//SMD/M06-L-D3/def2-TZVP) = -2453.504534 au

Mn -0.18965100 -0.17839700 0.04380600  
N -2.06958700 0.34767700 1.06522200  
N 2.02888900 -0.62824600 0.26225500  
O -0.89562400 -1.22158200 -1.17809900  
O 0.05275000 1.28362600 -1.29123200  
N -0.24594900 -1.49735600 1.47295500  
C 0.87334200 -2.04383400 1.97028600  
C 2.12415600 -1.32378000 1.58941300  
C 0.80106500 -3.11073900 2.84176700  
H 1.70943100 -3.56170500 3.21762400  
C -0.45307900 -3.57651200 3.22951000  
H -0.53340900 -4.41467900 3.90826000  
C -1.59765100 -2.93508700 2.77659700  
H -2.58023900 -3.23623200 3.11389300  
C -1.46598700 -1.87919600 1.89360300  
C -2.58502700 -1.02014400 1.39330100  
N 0.50421400 1.19614400 1.36635800  
C 1.78266600 1.57827700 1.29500400  
C 2.62868200 0.73119300 0.39608500  
C 2.23573800 2.64237000 2.05671000  
H 3.27179400 2.94720100 2.00245900  
C 1.33669800 3.28888600 2.89134600  
H 1.66257500 4.13209800 3.48570200  
C 0.02722800 2.83254000 2.99645700  
H -0.67695600 3.29249700 3.67611800  
C -0.35578500 1.75402300 2.22286600  
C -1.64977600 1.01711400 2.34053900  
H -3.37806900 -0.97732600 2.14448400  
H -3.01643800 -1.43876900 0.48458800  
H 2.99111700 -1.98125700 1.63793000  
H 2.29553800 -0.56593700 2.35660400  
H 3.64750800 0.68318300 0.79004700  
H 2.68568000 1.18082500 -0.59532900  
H -2.43943300 1.65179900 2.73895100  
H -1.49353700 0.24088000 3.09270300  
C 2.72164000 -1.45467600 -0.82315100  
C -3.13334300 1.19962500 0.35408000  
C -4.45687200 1.16375100 1.11369300  
C -3.36423800 0.69072000 -1.05765300  
C -2.62385000 2.63281500 0.26832600  
C 2.40050000 -0.87608900 -2.18900700  
C 2.17679900 -2.87575600 -0.76340000  
C 4.23547300 -1.46775300 -0.63009100  
H -4.35016700 1.41557400 2.16833000

H -5.13096800 1.89708100 0.67310300  
H -4.94226600 0.19151300 1.04047300  
H -2.48307400 0.82093600 -1.68092900  
H -3.65596500 -0.35767900 -1.08819100  
H -4.17977900 1.26619600 -1.49578500  
H -3.28856000 3.19986200 -0.38172400  
H -2.61097500 3.13921400 1.23258000  
H -1.62379300 2.66713400 -0.16439900  
H 1.33724700 -0.94594300 -2.40372100  
H 2.70560400 0.16435200 -2.29249200  
H 2.93981100 -1.44641200 -2.94469300  
H 2.50882000 -3.42233000 0.11823600  
H 1.08636200 -2.87853100 -0.78940400  
H 2.53287800 -3.42476800 -1.63379900  
H 4.53460800 -1.78944300 0.36689600  
H 4.67195900 -2.16899400 -1.34007200  
H 4.67896100 -0.49192200 -0.82347100  
O -0.29194400 0.82491800 -2.65052600  
H -0.62984800 -0.08103400 -2.38498400

**52''**

E (SMD/M06-L-D3/def2-TZVP) = -2454.216956 au  
H (SMD/M06-L-D3/def2-TZVP) = -2453.654269 au  
G (SMD/M06-L-D3/def2-TZVP) = -2453.741763 au  
E (SMD/B3LYP\*-D3/def2-TZVP//SMD/M06-L-D3/def2-TZVP) = -2453.523421 au  
Mn -0.19829600 -0.11815300 -0.18645300  
N -2.14549900 0.39015800 1.10998400  
N 2.10037500 -0.64449300 0.26604300  
O -0.84254800 -1.38366500 -1.09056600  
O 0.10103500 1.26613100 -1.20204100  
N -0.25879700 -1.44822300 1.50366800  
C 0.85379400 -2.03952500 1.93397900  
C 2.13788100 -1.36283900 1.56456100  
C 0.78551000 -3.13460000 2.78086400  
H 1.69314800 -3.62274500 3.10936400  
C -0.46137300 -3.56518300 3.20498500  
H -0.54267700 -4.41743800 3.86686100  
C -1.60225300 -2.88356000 2.80987400  
H -2.58179900 -3.16803900 3.16921500  
C -1.46406300 -1.81431200 1.94089800  
C -2.60885700 -0.97124100 1.46120300  
N 0.51119900 1.18161900 1.37267900  
C 1.79504500 1.54151200 1.33078600

C 2.66905100 0.71097300 0.43842700  
C 2.25750200 2.59031000 2.10747900  
H 3.30191400 2.86898400 2.07669500  
C 1.35455900 3.25854800 2.92008800  
H 1.68502700 4.09506800 3.52179200  
C 0.03749900 2.83308300 2.98999300  
H -0.67473500 3.30892200 3.65044600  
C -0.35250500 1.75819700 2.20705200  
C -1.68146900 1.08105000 2.34044100  
H -3.38040700 -0.94814000 2.23696700  
H -3.05673600 -1.42817100 0.57856000  
H 2.97020200 -2.06489700 1.61624400  
H 2.33347000 -0.63438100 2.35577800  
H 3.67716500 0.67512900 0.86278600  
H 2.75119200 1.18428100 -0.53991400  
H -2.43043100 1.77443600 2.72280900  
H -1.55949900 0.33418900 3.12910000  
C 2.78718200 -1.43925200 -0.83510500  
C -3.20322500 1.20541300 0.37866200  
C -4.52432600 1.20283900 1.14208600  
C -3.42005200 0.62994500 -1.01121200  
C -2.69216200 2.63321200 0.22967300  
C 2.45865800 -0.82375500 -2.18527500  
C 2.24063600 -2.86125000 -0.81322100  
C 4.30002000 -1.45930400 -0.63875000  
H -4.40826100 1.52531400 2.17689500  
H -5.21522100 1.89444000 0.66161500  
H -4.99288400 0.21932800 1.14019200  
H -2.51481600 0.70193300 -1.61304400  
H -3.74213200 -0.41034500 -0.99475900  
H -4.20328500 1.20170100 -1.50819100  
H -3.35657900 3.17716000 -0.43989900  
H -2.67135600 3.17761400 1.17290000  
H -1.69219600 2.64623800 -0.20513200  
H 1.38983200 -0.87079100 -2.38686800  
H 2.77713700 0.21460900 -2.26846600  
H 2.97719900 -1.38366500 -2.96294500  
H 2.57720800 -3.43244600 0.05099600  
H 1.15016500 -2.85945800 -0.83063600  
H 2.58949200 -3.38702400 -1.70068000  
H 4.58625400 -1.81224300 0.35203100  
H 4.74545200 -2.13628200 -1.36666500  
H 4.74265400 -0.47605500 -0.79389600  
O -0.58643600 0.55906300 -3.31396900

H -0.71598800 -0.17975100 -2.69374200

**<sup>5</sup>TS<sub>2-14</sub>**

E (SMD/M06-L-D3/def2-TZVP) = -2454.213339 au

H (SMD/M06-L-D3/def2-TZVP) = -2453.651687 au

G (SMD/M06-L-D3/def2-TZVP) = -2453.738905 au

E (SMD/B3LYP\*-D3/def2-TZVP//SMD/M06-L-D3/def2-TZVP) = -2453.519231 au

Mn -0.21537400 -0.14262500 -0.21979500

N -2.18850300 0.39045200 1.12216800

N 2.13221100 -0.66813100 0.25742400

O -0.87062200 -1.37091800 -1.19360500

O 0.07278300 1.23870500 -1.29395700

N -0.26728600 -1.45854500 1.47052300

C 0.84745900 -2.04121000 1.91496900

C 2.14288100 -1.37439400 1.55513900

C 0.77959900 -3.12219000 2.78006600

H 1.68923900 -3.60139700 3.11640300

C -0.46470300 -3.54840100 3.21419400

H -0.54406700 -4.39046400 3.88930400

C -1.60470700 -2.86897100 2.81484700

H -2.58306300 -3.14235300 3.18596800

C -1.47090400 -1.81351700 1.92831300

C -2.62807000 -0.97585700 1.46310700

N 0.49496300 1.17577900 1.32363700

C 1.78432700 1.52659800 1.29527100

C 2.67505400 0.69413200 0.41954200

C 2.24997500 2.56952900 2.07849000

H 3.29712200 2.83836800 2.05247500

C 1.35147500 3.24135500 2.89164800

H 1.68520900 4.07412100 3.49680600

C 0.03465700 2.81703700 2.96060700

H -0.67532200 3.28723100 3.62764100

C -0.36258800 1.74914900 2.17183300

C -1.69531100 1.08015200 2.33274200

H -3.39607000 -0.98098000 2.24416900

H -3.07403700 -1.43146700 0.57803700

H 2.96731900 -2.08467800 1.63247400

H 2.32971100 -0.64335300 2.34687200

H 3.68122200 0.68929000 0.85247700

H 2.75709300 1.15877200 -0.56353600

H -2.42632500 1.78308300 2.73458900

H -1.55892100 0.33758500 3.12379200

C 2.82399100 -1.46136900 -0.83261600

C -3.24582200 1.20147000 0.39881800  
C -4.56069300 1.20979100 1.17296500  
C -3.47707400 0.62403800 -0.98941500  
C -2.72937100 2.62600100 0.23309600  
C 2.49312100 -0.85386900 -2.18731400  
C 2.28330200 -2.88614200 -0.80911000  
C 4.33641900 -1.47669100 -0.63198200  
H -4.43149600 1.54363500 2.20286200  
H -5.25991900 1.89405600 0.69372000  
H -5.02671400 0.22489500 1.18926300  
H -2.57611400 0.69195800 -1.59884600  
H -3.80164200 -0.41535300 -0.96970300  
H -4.26220400 1.19721500 -1.48187500  
H -3.40126500 3.17181200 -0.42759400  
H -2.68649100 3.17559900 1.17257100  
H -1.73695500 2.62961900 -0.21993700  
H 1.42324600 -0.90188800 -2.38542900  
H 2.81124600 0.18405500 -2.27800000  
H 3.00921100 -1.41757800 -2.96404100  
H 2.61290400 -3.45087700 0.06212500  
H 1.19283000 -2.89099800 -0.83672600  
H 2.64273300 -3.41632500 -1.68978200  
H 4.61632900 -1.82770300 0.36168700  
H 4.79239100 -2.15050500 -1.35652400  
H 4.77497300 -0.49056100 -0.78203600  
O -0.40001500 0.87597600 -3.13391600  
H -0.66589400 0.00159900 -2.79688100

#### <sup>5</sup>14

E (SMD/M06-L-D3/def2-TZVP) = -2454.237207 au  
H (SMD/M06-L-D3/def2-TZVP) = -2453.673638 au  
G (SMD/M06-L-D3/def2-TZVP) = -2453.760381 au  
E (SMD/B3LYP\*-D3/def2-TZVP//SMD/M06-L-D3/def2-TZVP) = -2453.5502 au  
Mn -0.21287800 -0.14759200 -0.21125700  
N -2.21616100 0.40157600 1.14369900  
N 2.16880500 -0.66888700 0.26266800  
O -0.85073700 -1.29769400 -1.38502600  
O 0.00454400 1.24822600 -1.54658800  
N -0.28039000 -1.47776800 1.42439400  
C 0.83708300 -2.04979600 1.88488700  
C 2.13989800 -1.37409100 1.55591600  
C 0.76686400 -3.12419400 2.75760900  
H 1.67698700 -3.59540400 3.10388300

C -0.47716200 -3.55151600 3.19110700  
H -0.55662600 -4.38999200 3.87068800  
C -1.61558200 -2.86990100 2.79257400  
H -2.59293300 -3.13376900 3.17309300  
C -1.48379100 -1.82020600 1.89892100  
C -2.64505300 -0.97061900 1.46135000  
N 0.48689300 1.19256300 1.28856200  
C 1.78174700 1.53461200 1.27904500  
C 2.68924000 0.69908600 0.42270100  
C 2.24832600 2.56857200 2.07412800  
H 3.29777000 2.82888700 2.05689100  
C 1.35205600 3.23698400 2.89110600  
H 1.68744100 4.06240700 3.50540800  
C 0.03638000 2.80976400 2.95825100  
H -0.67114800 3.26761700 3.63635900  
C -0.36492700 1.75281700 2.15770300  
C -1.69304500 1.07713100 2.34317500  
H -3.40647600 -1.00268700 2.24920500  
H -3.09775700 -1.40903600 0.57038300  
H 2.96348700 -2.08229100 1.66474200  
H 2.29652600 -0.64299100 2.35472900  
H 3.69125700 0.71898500 0.86651400  
H 2.77726700 1.15643300 -0.56365800  
H -2.41163600 1.77478700 2.77766900  
H -1.53052800 0.32746600 3.12311800  
C 2.88202000 -1.45781100 -0.81059000  
C -3.27337400 1.22172500 0.44039100  
C -4.57934400 1.23986700 1.22939300  
C -3.52510600 0.65575100 -0.94942900  
C -2.74543000 2.64239400 0.27388300  
C 2.59152900 -0.83919900 -2.17058700  
C 2.32753200 -2.87774500 -0.80969000  
C 4.38899600 -1.49008500 -0.57224000  
H -4.43368100 1.57220900 2.25775500  
H -5.28190200 1.92807800 0.76044200  
H -5.05051300 0.25738000 1.25249700  
H -2.62787600 0.71370900 -1.56492600  
H -3.86546600 -0.37857000 -0.93396700  
H -4.30542700 1.24323400 -1.43293000  
H -3.42215900 3.20074900 -0.37128400  
H -2.67820000 3.18512800 1.21601700  
H -1.76090900 2.63892600 -0.19688900  
H 1.52322000 -0.85065900 -2.38342600  
H 2.95020700 0.18549400 -2.25923300

H 3.09711700 -1.42178900 -2.94035700  
H 2.62335700 -3.44689200 0.07095900  
H 1.23813000 -2.87149300 -0.87032700  
H 2.70874000 -3.41088300 -1.67939000  
H 4.63908400 -1.86034600 0.42257400  
H 4.86059900 -2.15468800 -1.29549000  
H 4.83905800 -0.50487900 -0.69232800  
O -0.41447700 0.78592500 -2.87878100  
H -0.68398000 -0.14279000 -2.60994900

**<sup>5</sup>TS'**<sub>2-14</sub>

E (SMD/M06-L-D3/def2-TZVP) = -2530.678221 au  
H (SMD/M06-L-D3/def2-TZVP) = -2530.089474 au  
G (SMD/M06-L-D3/def2-TZVP) = -2530.18489 au  
E (SMD/B3LYP\*-D3/def2-TZVP//SMD/M06-L-D3/def2-TZVP) = -2529.965296 au  
Mn -0.19975900 -0.22048800 -0.21087800  
N -2.17611000 0.36219000 1.10890600  
N 2.13908500 -0.74217900 0.28654300  
O -0.84628100 -1.47316300 -1.15746800  
O 0.06893800 1.13770400 -1.33476700  
N -0.26481600 -1.48158900 1.51969400  
C 0.84689500 -2.04839800 1.99102400  
C 2.14509200 -1.40012700 1.60947400  
C 0.77435300 -3.09360100 2.89864800  
H 1.68219300 -3.56011500 3.25686100  
C -0.47181700 -3.49964500 3.34601600  
H -0.55512000 -4.31370700 4.05417900  
C -1.60884500 -2.83353800 2.91707900  
H -2.58881200 -3.08836800 3.29701200  
C -1.47016300 -1.81454300 1.98986400  
C -2.62272200 -0.98993100 1.49326800  
N 0.51010800 1.14638900 1.28143700  
C 1.80174300 1.48926700 1.24391300  
C 2.68708300 0.62405300 0.39516100  
C 2.27189900 2.55387600 1.99414400  
H 3.32040100 2.81641900 1.96067800  
C 1.37583800 3.25556000 2.78449000  
H 1.71305900 4.10566600 3.36298300  
C 0.05719300 2.83935200 2.86653100  
H -0.65055300 3.33320600 3.51864300  
C -0.34511100 1.74899100 2.11188600  
C -1.67988600 1.08995300 2.29553000  
H -3.39361500 -0.96663000 2.27111500

H -3.06691600 -1.47284400 0.62182500  
H 2.96521000 -2.11183500 1.71348500  
H 2.33499700 -0.64222900 2.37469300  
H 3.69602300 0.63331500 0.82118400  
H 2.76176500 1.05328700 -0.60483800  
H -2.40814400 1.80842500 2.67408400  
H -1.54521800 0.37362200 3.11073800  
C 2.82613500 -1.58322800 -0.77070800  
C -3.22980800 1.15363800 0.35874200  
C -4.54365000 1.19828500 1.13344300  
C -3.46624900 0.52679400 -1.00682500  
C -2.70511100 2.56820500 0.14176400  
C 2.53553000 -0.99985500 -2.14439500  
C 2.24677400 -2.99138100 -0.71258300  
C 4.33522100 -1.63146300 -0.55007700  
H -4.41183000 1.57091200 2.14956900  
H -5.23941400 1.86760800 0.62868100  
H -5.01538700 0.21751900 1.18787100  
H -2.56386800 0.55959000 -1.61655900  
H -3.80459600 -0.50668900 -0.94764000  
H -4.24352600 1.09037900 -1.52232900  
H -3.37387200 3.09373300 -0.53831800  
H -2.65946500 3.15115300 1.06085900  
H -1.71287200 2.54903400 -0.31085800  
H 1.46401500 -0.96577400 -2.33907500  
H 2.94228200 0.00161300 -2.26813700  
H 2.99920500 -1.62908500 -2.90373000  
H 2.53988600 -3.53322300 0.18592700  
H 1.15748300 -2.96753300 -0.76692200  
H 2.61362900 -3.56193400 -1.56448200  
H 4.59647200 -1.98247900 0.44844000  
H 4.78387300 -2.32047200 -1.26483400  
H 4.79752000 -0.65646000 -0.70172700  
O -0.46511900 0.71504000 -3.12538600  
H -0.62594500 -0.18419900 -2.78446300  
O 1.90895200 1.58736500 -4.20796900  
H 1.59142400 2.35203200 -4.69763300  
H 1.09242500 1.20842200 -3.81240100

**<sup>5</sup>TS''<sub>2-14</sub>**

E (SMD/M06-L-D3/def2-TZVP) = -2607.145322 au  
H (SMD/M06-L-D3/def2-TZVP) = -2606.529433 au  
G (SMD/M06-L-D3/def2-TZVP) = -2606.632017 au

E (SMD/B3LYP\*-D3/def2-TZVP//SMD/M06-L-D3/def2-TZVP) = -2606.413877 au  
Mn -0.18549700 -0.16806700 -0.19285500  
N -2.17793900 0.37829600 1.11221200  
N 2.14793500 -0.68952700 0.31822800  
O -0.82577800 -1.39227200 -1.18063200  
O 0.11927800 1.20583000 -1.30344900  
N -0.26746600 -1.46954400 1.50118700  
C 0.84058700 -2.04484500 1.97120200  
C 2.13956000 -1.37807800 1.62592400  
C 0.75972800 -3.11632700 2.84673600  
H 1.66429400 -3.58946000 3.20453400  
C -0.49119500 -3.54081400 3.26306700  
H -0.58077900 -4.37585400 3.94554200  
C -1.62539700 -2.86775000 2.83724500  
H -2.60945100 -3.13863500 3.19479700  
C -1.47821300 -1.82099100 1.94287300  
C -2.62643600 -0.98537800 1.45372000  
N 0.49960300 1.17156100 1.33224400  
C 1.79025900 1.52006800 1.31959800  
C 2.69162200 0.67480500 0.46800200  
C 2.24600900 2.56886100 2.10049900  
H 3.29363800 2.83647100 2.08644000  
C 1.33746900 3.24689400 2.89708800  
H 1.66369000 4.08434400 3.49982600  
C 0.02047000 2.82126400 2.95531400  
H -0.69669800 3.29405400 3.61267000  
C -0.36752000 1.74815000 2.16954300  
C -1.69777300 1.07335700 2.32466200  
H -3.40662300 -0.98407500 2.22245300  
H -3.05921200 -1.44442000 0.56381700  
H 2.96470300 -2.08453500 1.72593200  
H 2.31044600 -0.63595600 2.41084200  
H 3.69145500 0.67412500 0.91495700  
H 2.78811600 1.12513800 -0.52026000  
H -2.43585500 1.77223300 2.72060300  
H -1.56127800 0.33314700 3.11776000  
C 2.85668600 -1.50062600 -0.74844300  
C -3.22506500 1.18756500 0.37280400  
C -4.55192800 1.19590500 1.12588100  
C -3.43067300 0.60711600 -1.01797200  
C -2.71055800 2.61396400 0.21693800  
C 2.55692900 -0.90708000 -2.11578700  
C 2.30731000 -2.92174400 -0.71665800  
C 4.36494900 -1.52103300 -0.51886800

H -4.43914100 1.53465000 2.15614300  
H -5.24453600 1.87674700 0.63242700  
H -5.01613400 0.21028600 1.13876400  
H -2.51056000 0.65218800 -1.60045300  
H -3.77631300 -0.42559700 -1.00035500  
H -4.18952700 1.19268800 -1.53706300  
H -3.39295500 3.16563800 -0.42967500  
H -2.66408200 3.15755800 1.15958700  
H -1.71882300 2.62593700 -0.23938800  
H 1.49074300 -0.94848700 -2.33479900  
H 2.88669900 0.12639500 -2.21191000  
H 3.08246300 -1.48333700 -2.87681800  
H 2.61699600 -3.47666400 0.16815800  
H 1.21752000 -2.92090900 -0.76510000  
H 2.68050800 -3.46550000 -1.58318900  
H 4.62542400 -1.86259700 0.48327100  
H 4.83032500 -2.20499900 -1.22768200  
H 4.81113100 -0.53880200 -0.67180500  
O -0.32080200 0.78385300 -3.09815500  
H -0.61967300 -0.08097300 -2.75734100  
O 1.77493900 0.65200600 -4.90070200  
H 1.38921500 1.11581000 -5.64999800  
H 1.06570300 0.67562400 -4.22173100  
O -2.07561700 2.89452200 -3.31826900  
H -1.50507300 2.10279500 -3.20141800  
H -2.44619300 3.03927600 -2.44144700

### OH<sup>-</sup>

E (SMD/M06-L-D3/def2-TZVP) = -75.950221 au  
H (SMD/M06-L-D3/def2-TZVP) = -75.938202 au  
G (SMD/M06-L-D3/def2-TZVP) = -75.95775 au  
E (SMD/B3LYP\*-D3/def2-TZVP//SMD/M06-L-D3/def2-TZVP) = -75.933573 au  
O -0.77462500 0.72499200 0.00000000  
H -1.09528000 1.63049400 0.00000000

### H<sub>2</sub>O

E (SMD/M06-L-D3/def2-TZVP) = -76.455734 au  
H (SMD/M06-L-D3/def2-TZVP) = -76.430794 au  
G (SMD/M06-L-D3/def2-TZVP) = -76.452877 au  
E (SMD/B3LYP\*-D3/def2-TZVP//SMD/M06-L-D3/def2-TZVP) = -76.435028 au  
O 0.14302600 -0.00111700 0.00000000  
H 1.10412900 0.05003900 0.00000000

H -0.12958700 0.92194800 0.00000000

### OH-H<sub>2</sub>O

E (SMD/M06-L-D3/def2-TZVP) = -152.42019 au  
H (SMD/M06-L-D3/def2-TZVP) = -152.382347 au  
G (SMD/M06-L-D3/def2-TZVP) = -152.412147 au  
E (SMD/B3LYP\*-D3/def2-TZVP//SMD/M06-L-D3/def2-TZVP) = -152.385931 au  
O -0.28644000 -0.58706200 -0.25638100  
H 0.72214300 -0.39956400 -0.24593900  
H -0.64725600 0.00267000 0.41108600  
O 2.26516800 -0.13117500 -0.30038100  
H 2.61638200 -0.69812400 0.39161600

### OH-2H<sub>2</sub>O

E (SMD/M06-L-D3/def2-TZVP) = -228.88886 au  
H (SMD/M06-L-D3/def2-TZVP) = -228.823981 au  
G (SMD/M06-L-D3/def2-TZVP) = -228.862359 au  
E (SMD/B3LYP\*-D3/def2-TZVP//SMD/M06-L-D3/def2-TZVP) = -228.835812 au  
O -0.15885000 -0.86592500 -0.09709800  
H 0.78611600 -0.54924200 0.07460900  
H -0.69951600 -0.07968600 0.01853600  
O 2.33548600 -0.16183300 0.36786200  
H 2.63848400 0.24049300 -0.45113400  
O 2.70058600 -2.74319500 -0.01127000  
H 3.60251800 -2.94156500 0.25528700  
H 2.60879200 -1.74650500 0.13381500

### <sup>48</sup>

E (SMD/M06-L-D3/def2-TZVP) = -2378.922927 au  
H (SMD/M06-L-D3/def2-TZVP) = -2378.361441 au  
G (SMD/M06-L-D3/def2-TZVP) = -2378.442615 au  
E (SMD/B3LYP\*-D3/def2-TZVP//SMD/M06-L-D3/def2-TZVP) = -2378.249522 au  
Mn 0 -0.0244405710 -0.0903058111 0.6672997135  
N 0 -2.0757169405 0.3727192467 0.0773389977  
N 0 2.0981651368 -0.3733375534 -0.0246884297  
O 0 0.0775704246 1.2285703023 1.9758180062  
O 0 -0.1002341173 -1.4507593978 1.6785807024  
N 0 0.1792113792 1.4676465064 -0.6562808320  
C 0 1.3452761934 1.6693521945 -1.2660642003  
C 0 2.2601992471 0.4887708230 -1.2455182518  
C 0 1.5734130369 2.8548381000 -1.9425718705  
H 0 2.5229485855 3.0333190758 -2.4276500616

|   |   |               |               |               |
|---|---|---------------|---------------|---------------|
| C | 0 | 0.5492434374  | 3.7900560151  | -1.9908780039 |
| H | 0 | 0.7018077750  | 4.7238540863  | -2.5156819992 |
| C | 0 | -0.6771203785 | 3.5295960044  | -1.3954840678 |
| H | 0 | -1.4952854639 | 4.2332028179  | -1.4585490784 |
| C | 0 | -0.8303400404 | 2.3343345602  | -0.7160384864 |
| C | 0 | -2.0752595539 | 1.8673523955  | -0.0282424001 |
| N | 0 | -0.1719398590 | -1.2728785680 | -0.9620120163 |
| C | 0 | 0.8491011735  | -2.0867179410 | -1.2375621654 |
| C | 0 | 2.0885332124  | -1.8024643439 | -0.4521046717 |
| C | 0 | 0.7052717566  | -3.0680080659 | -2.2005685626 |
| H | 0 | 1.5332109945  | -3.7204980150 | -2.4391387264 |
| C | 0 | -0.5179130217 | -3.1844298414 | -2.8458725801 |
| H | 0 | -0.6601087626 | -3.9567334684 | -3.5899679384 |
| C | 0 | -1.5496637713 | -2.3013627834 | -2.5660288245 |
| H | 0 | -2.4970226561 | -2.3562567416 | -3.0835131773 |
| C | 0 | -1.3339297889 | -1.3218312067 | -1.6124317918 |
| C | 0 | -2.2534817544 | -0.1894100203 | -1.3096724066 |
| H | 0 | -2.9558507965 | 2.2102505336  | -0.5747347827 |
| H | 0 | -2.1281614815 | 2.2870513561  | 0.9750783469  |
| H | 0 | 3.2985818770  | 0.7839638777  | -1.3824785151 |
| H | 0 | 2.0111723881  | -0.1149722495 | -2.1211075738 |
| H | 0 | 2.9715536716  | -2.0413729589 | -1.0484990843 |
| H | 0 | 2.1123652472  | -2.4307617618 | 0.4384075853  |
| H | 0 | -3.2930285665 | -0.4519798331 | -1.4922934155 |
| H | 0 | -2.0214903560 | 0.6013324786  | -2.0264016510 |
| C | 0 | 3.2101503805  | -0.0807685984 | 0.9969463926  |
| C | 0 | -3.1913275580 | -0.1331577618 | 1.0172154231  |
| C | 0 | -4.5237834722 | 0.5156077724  | 0.6555052358  |
| C | 0 | -2.8454529636 | 0.2074447224  | 2.4563522453  |
| C | 0 | -3.2948865202 | -1.6446323603 | 0.8729918100  |
| C | 0 | 2.8650055800  | -0.7147699705 | 2.3333932013  |
| C | 0 | 3.3172050570  | 1.4269951274  | 1.1827009109  |
| C | 0 | 4.5433179504  | -0.6368940148 | 0.5058976212  |
| H | 0 | -4.7791198737 | 0.4002811525  | -0.3972858116 |
| H | 0 | -5.3077758475 | 0.0294755525  | 1.2338806974  |
| H | 0 | -4.5445821866 | 1.5754094793  | 0.9039104460  |
| H | 0 | -1.9550556988 | -0.3249810699 | 2.7837404181  |
| H | 0 | -2.6959174312 | 1.2739530087  | 2.6149599302  |
| H | 0 | -3.6789971059 | -0.0995064908 | 3.0869841706  |
| H | 0 | -3.9506768961 | -2.0213263318 | 1.6559933523  |
| H | 0 | -3.7253123708 | -1.9508060218 | -0.0794381772 |
| H | 0 | -2.3222423885 | -2.1206615732 | 0.9936974856  |
| H | 0 | 1.9896431753  | -0.2497470394 | 2.7803042657  |
| H | 0 | 2.6877853390  | -1.7862854610 | 2.2607833419  |

|   |   |               |               |               |
|---|---|---------------|---------------|---------------|
| H | 0 | 3.7087675603  | -0.5699858488 | 3.0073161586  |
| H | 0 | 3.7481615693  | 1.9315269839  | 0.3192618386  |
| H | 0 | 2.3474178223  | 1.8696718299  | 1.4055974745  |
| H | 0 | 3.9745407827  | 1.6238576272  | 2.0279822397  |
| H | 0 | 4.7920334097  | -0.3065008599 | -0.5021920124 |
| H | 0 | 5.3308330777  | -0.2811619188 | 1.1684358144  |
| H | 0 | 4.5653820643  | -1.7254171447 | 0.5274046426  |
| H | 0 | -0.0147061122 | 0.7789213970  | 2.8252910980  |

### <sup>5</sup>17

E (SMD/M06-L-D3/def2-TZVP) = -2379.544901 au

H (SMD/M06-L-D3/def2-TZVP) = -2378.972265 au

G (SMD/M06-L-D3/def2-TZVP) = -2379.058572 au

E (SMD/B3LYP\*-D3/def2-TZVP//SMD/M06-L-D3/def2-TZVP) = -2378.879075 au

|    |   |               |               |               |
|----|---|---------------|---------------|---------------|
| Mn | 0 | -0.2259600567 | -0.1669244870 | -0.1474746373 |
| N  | 0 | -2.1906709904 | 0.3835498665  | 1.1387310887  |
| N  | 0 | 2.1367752062  | -0.6702293178 | 0.2760577901  |
| O  | 0 | -0.8895525932 | -1.3345260251 | -1.2286332449 |
| O  | 0 | -0.0107739969 | 1.3963215300  | -1.6595532774 |
| N  | 0 | -0.2738478772 | -1.4765303680 | 1.4960763619  |
| C  | 0 | 0.8450011716  | -2.0600909641 | 1.9285967912  |
| C  | 0 | 2.1415713956  | -1.3875382030 | 1.5684929362  |
| C  | 0 | 0.7763999464  | -3.1442215909 | 2.7890666954  |
| H  | 0 | 1.6849400713  | -3.6280025815 | 3.1217663593  |
| C  | 0 | -0.4687700338 | -3.5679414117 | 3.2253647250  |
| H  | 0 | -0.5474611983 | -4.4131248724 | 3.8966060922  |
| C  | 0 | -1.6104039388 | -2.8849547926 | 2.8355055087  |
| H  | 0 | -2.5869670780 | -3.1589343808 | 3.2108325162  |
| C  | 0 | -1.4790539523 | -1.8257244655 | 1.9534957805  |
| C  | 0 | -2.6351565018 | -0.9786936707 | 1.4938626105  |
| N  | 0 | 0.4862483292  | 1.1972246317  | 1.3054148078  |
| C  | 0 | 1.7819536629  | 1.5350624372  | 1.2987144628  |
| C  | 0 | 2.6819479934  | 0.6903486115  | 0.4457318567  |
| C  | 0 | 2.2483576739  | 2.5692465195  | 2.0930024159  |
| H  | 0 | 3.2983998049  | 2.8269310595  | 2.0800052971  |
| C  | 0 | 1.3499209839  | 3.2417937457  | 2.9046893788  |
| H  | 0 | 1.6854646059  | 4.0671907760  | 3.5187974029  |
| C  | 0 | 0.0321888460  | 2.8197474602  | 2.9681621545  |
| H  | 0 | -0.6760742741 | 3.2816137662  | 3.6425173860  |
| C  | 0 | -0.3679516427 | 1.7616360604  | 2.1693364354  |
| C  | 0 | -1.6925917954 | 1.0823866316  | 2.3432666611  |
| H  | 0 | -3.3954273176 | -0.9749448278 | 2.2821691351  |
| H  | 0 | -3.0920655255 | -1.4366095473 | 0.6151693139  |
| H  | 0 | 2.9661149976  | -2.0980339779 | 1.6443450944  |

|   |   |               |               |               |
|---|---|---------------|---------------|---------------|
| H | 0 | 2.3248840324  | -0.6604716963 | 2.3648897495  |
| H | 0 | 3.6795947923  | 0.6841939343  | 0.8980479799  |
| H | 0 | 2.7974065996  | 1.1497800329  | -0.5366454295 |
| H | 0 | -2.4271038773 | 1.7771473292  | 2.7529551164  |
| H | 0 | -1.5391953068 | 0.3429046273  | 3.1341567717  |
| C | 0 | 2.8236605505  | -1.4484955071 | -0.8254232327 |
| C | 0 | -3.2474892361 | 1.1986601261  | 0.4162740442  |
| C | 0 | -4.5600686126 | 1.2161465471  | 1.1930055917  |
| C | 0 | -3.4886012089 | 0.6255065735  | -0.9716004118 |
| C | 0 | -2.7210169820 | 2.6192194060  | 0.2454214944  |
| C | 0 | 2.4909406355  | -0.8094089545 | -2.1665507450 |
| C | 0 | 2.2760267920  | -2.8703078200 | -0.8236806233 |
| C | 0 | 4.3361503641  | -1.4765478590 | -0.6288965386 |
| H | 0 | -4.4272548054 | 1.5485972364  | 2.2227547713  |
| H | 0 | -5.2557044136 | 1.9050246901  | 0.7151791219  |
| H | 0 | -5.0321911998 | 0.2341784288  | 1.2093436134  |
| H | 0 | -2.5938368905 | 0.6986762894  | -1.5882348016 |
| H | 0 | -3.8066130096 | -0.4158798630 | -0.9538550272 |
| H | 0 | -4.2799309104 | 1.1976313219  | -1.4550043342 |
| H | 0 | -3.3888075071 | 3.1670803793  | -0.4176422775 |
| H | 0 | -2.6733448952 | 3.1729404616  | 1.1820698974  |
| H | 0 | -1.7294666211 | 2.6177331030  | -0.2081441283 |
| H | 0 | 1.4149371940  | -0.8098109506 | -2.3405872720 |
| H | 0 | 2.8573177601  | 0.2132323023  | -2.2530463516 |
| H | 0 | 2.9625094341  | -1.3840023747 | -2.9631100927 |
| H | 0 | 2.5977416131  | -3.4446869731 | 0.0442506706  |
| H | 0 | 1.1858566390  | -2.8710733870 | -0.8578013678 |
| H | 0 | 2.6398749944  | -3.3929449084 | -1.7069819270 |
| H | 0 | 4.6137939783  | -1.8568572387 | 0.3546016242  |
| H | 0 | 4.7887312971  | -2.1323634672 | -1.3718159732 |
| H | 0 | 4.7801277743  | -0.4890100304 | -0.7511785550 |
| H | 0 | 0.9267162881  | 1.5807167502  | -1.8087154039 |
| H | 0 | -0.3008439188 | 0.9658229788  | -2.4761477424 |

<sup>5</sup>5

E (SMD/M06-L-D3/def2-TZVP) = -2379.577198 au

H (SMD/M06-L-D3/def2-TZVP) = -2379.006158 au

G (SMD/M06-L-D3/def2-TZVP) = -2379.092936 au

E (SMD/B3LYP\*-D3/def2-TZVP//SMD/M06-L-D3/def2-TZVP) = -2378.910249 au

|    |   |               |               |               |
|----|---|---------------|---------------|---------------|
| Mn | 0 | -0.0125574272 | -0.0941085665 | 0.9019345581  |
| N  | 0 | -2.2492469502 | 0.4082022206  | 0.0457377401  |
| N  | 0 | 2.2480234807  | -0.3890881736 | -0.0438157462 |
| O  | 0 | 0.1082307590  | 1.1957438277  | 2.2607060990  |
| O  | 0 | -0.1116463398 | -1.6596144533 | 1.9441455001  |

|   |   |               |               |               |
|---|---|---------------|---------------|---------------|
| N | 0 | 0.1729704864  | 1.4429229710  | -0.5118420493 |
| C | 0 | 1.3276262304  | 1.6431346990  | -1.1617960700 |
| C | 0 | 2.2856926108  | 0.4902701842  | -1.2222112618 |
| C | 0 | 1.5418660691  | 2.8168195125  | -1.8644073603 |
| H | 0 | 2.4877654649  | 2.9741621811  | -2.3645455363 |
| C | 0 | 0.5238531786  | 3.7529697553  | -1.9307165300 |
| H | 0 | 0.6718070895  | 4.6785939296  | -2.4712483699 |
| C | 0 | -0.6999921397 | 3.4783847045  | -1.3444906885 |
| H | 0 | -1.5368858191 | 4.1563779641  | -1.4393600543 |
| C | 0 | -0.8506684556 | 2.2985591386  | -0.6361398395 |
| C | 0 | -2.1565898998 | 1.8749489011  | -0.0304625738 |
| N | 0 | -0.1831838927 | -1.2783481385 | -0.8165939347 |
| C | 0 | 0.8456565175  | -2.0772006629 | -1.1320012877 |
| C | 0 | 2.1493611745  | -1.8018411768 | -0.4415601132 |
| C | 0 | 0.7015151524  | -3.0609960061 | -2.0949509786 |
| H | 0 | 1.5420221028  | -3.6946243898 | -2.3422219793 |
| C | 0 | -0.5195748922 | -3.1967485807 | -2.7333986900 |
| H | 0 | -0.6612549906 | -3.9721641465 | -3.4746597840 |
| C | 0 | -1.5415639837 | -2.3044354952 | -2.4572623666 |
| H | 0 | -2.4839314447 | -2.3435324085 | -2.9862611864 |
| C | 0 | -1.3338865816 | -1.3243127620 | -1.5014091239 |
| C | 0 | -2.2889435211 | -0.1849658820 | -1.3016582146 |
| H | 0 | -2.9681366204 | 2.3163375282  | -0.6189887473 |
| H | 0 | -2.2418511486 | 2.2861839468  | 0.9762459109  |
| H | 0 | 3.2922611645  | 0.8485853168  | -1.4443095214 |
| H | 0 | 1.9948458079  | -0.0904911813 | -2.1025774980 |
| H | 0 | 2.9626454173  | -2.1091570239 | -1.1081205557 |
| H | 0 | 2.2248127773  | -2.4234751709 | 0.4516557025  |
| H | 0 | -3.2966081403 | -0.4777743533 | -1.6006315583 |
| H | 0 | -1.9912430638 | 0.5768693250  | -2.0279222536 |
| C | 0 | 3.3720028398  | -0.1099797715 | 0.9297058899  |
| C | 0 | -3.3747978265 | -0.0816498221 | 0.9319361690  |
| C | 0 | -4.7056092688 | 0.5422806913  | 0.5259737225  |
| C | 0 | -3.0605130544 | 0.2612985011  | 2.3810433438  |
| C | 0 | -3.4570538666 | -1.5990955160 | 0.8159259681  |
| C | 0 | 3.0696317824  | -0.7836946577 | 2.2605063537  |
| C | 0 | 3.4407500504  | 1.3936415049  | 1.1691970170  |
| C | 0 | 4.7062427655  | -0.6127831621 | 0.3884950575  |
| H | 0 | -4.9249864361 | 0.3821523037  | -0.5301896462 |
| H | 0 | -5.5128042109 | 0.0888561277  | 1.1000991517  |
| H | 0 | -4.7269846101 | 1.6141329664  | 0.7208628614  |
| H | 0 | -2.1506097373 | -0.2411881296 | 2.7083974465  |
| H | 0 | -2.9467029672 | 1.3307427252  | 2.5520332603  |
| H | 0 | -3.8812241309 | -0.0795422262 | 3.0115363356  |

|   |   |               |               |               |
|---|---|---------------|---------------|---------------|
| H | 0 | -4.1510204462 | -1.9740455270 | 1.5665771615  |
| H | 0 | -3.8242106066 | -1.9312984879 | -0.1543044985 |
| H | 0 | -2.4867130351 | -2.0615090007 | 0.9993825469  |
| H | 0 | 2.1527475188  | -0.3887874372 | 2.6974083668  |
| H | 0 | 2.9768095524  | -1.8655820274 | 2.1792721996  |
| H | 0 | 3.8871428324  | -0.5828647208 | 2.9523163450  |
| H | 0 | 3.7950961425  | 1.9461398423  | 0.2998821787  |
| H | 0 | 2.4675568269  | 1.7889717340  | 1.4621580595  |
| H | 0 | 4.1388422645  | 1.5916699364  | 1.9811189468  |
| H | 0 | 4.9242804108  | -0.2096952104 | -0.6009849105 |
| H | 0 | 5.5117887265  | -0.3021283113 | 1.0529235270  |
| H | 0 | 4.7331583564  | -1.7005005859 | 0.3275637694  |
| H | 0 | 0.1609588515  | -1.4556335688 | 2.8470046856  |
| H | 0 | -0.1513398964 | 0.8006572950  | 3.1017830544  |

**61**

E (SMD/M06-L-D3/def2-TZVP) = -2380.656254 au

H (SMD/M06-L-D3/def2-TZVP) = -2380.05939 au

G (SMD/M06-L-D3/def2-TZVP) = -2380.148951 au

E (SMD/B3LYP\*-D3/def2-TZVP//SMD/M06-L-D3/def2-TZVP) = -2379.987742 au

|    |   |               |               |               |
|----|---|---------------|---------------|---------------|
| Mn | 0 | -0.5349262857 | 0.1332274218  | -0.3294182917 |
| N  | 0 | -2.5146951116 | 0.6744246805  | 1.1034436764  |
| N  | 0 | 1.7774173863  | -0.3570749912 | 0.2157971117  |
| O  | 0 | -1.3501227799 | -1.1698609977 | -2.0154981545 |
| O  | 0 | -0.2167430114 | 1.8821688578  | -1.8842777684 |
| N  | 0 | -0.6182336592 | -1.2317138917 | 1.4010317001  |
| C  | 0 | 0.5053835033  | -1.7528926011 | 1.8934531454  |
| C  | 0 | 1.7976380055  | -1.0885147889 | 1.5003252669  |
| C  | 0 | 0.4582486325  | -2.7486128279 | 2.8587289397  |
| H  | 0 | 1.3745272245  | -3.1826234848 | 3.2364431901  |
| C  | 0 | -0.7776813874 | -3.1373157715 | 3.3483944835  |
| H  | 0 | -0.8420104028 | -3.9098180779 | 4.1037936023  |
| C  | 0 | -1.9271840602 | -2.4940550561 | 2.9137015236  |
| H  | 0 | -2.8945501767 | -2.7214317973 | 3.3407833930  |
| C  | 0 | -1.8090762482 | -1.5278538640 | 1.9285335851  |
| C  | 0 | -2.9610166097 | -0.6925253438 | 1.4390036494  |
| N  | 0 | 0.1555450229  | 1.4906263662  | 1.3068172305  |
| C  | 0 | 1.4418771818  | 1.8408214000  | 1.2788258369  |
| C  | 0 | 2.3261401613  | 1.0034008032  | 0.3937733348  |
| C  | 0 | 1.9105820772  | 2.8851682919  | 2.0604371915  |
| H  | 0 | 2.9564622374  | 3.1600197745  | 2.0353678952  |
| C  | 0 | 1.0086676781  | 3.5519212538  | 2.8754563524  |
| H  | 0 | 1.3409874713  | 4.3851096489  | 3.4811522178  |
| C  | 0 | -0.3084791576 | 3.1250251759  | 2.9478057791  |

|   |   |               |               |               |
|---|---|---------------|---------------|---------------|
| H | 0 | -1.0153811561 | 3.5952407896  | 3.6185494607  |
| C | 0 | -0.7023759814 | 2.0574935140  | 2.1553949310  |
| C | 0 | -2.0361397600 | 1.3770265097  | 2.3092577401  |
| H | 0 | -3.7475296032 | -0.7014391447 | 2.2019211051  |
| H | 0 | -3.3883263750 | -1.1477515653 | 0.5439024360  |
| H | 0 | 2.6201827696  | -1.8038170357 | 1.5532237541  |
| H | 0 | 2.0055071718  | -0.3718356190 | 2.3001559870  |
| H | 0 | 3.3356477474  | 0.9908966920  | 0.8188701498  |
| H | 0 | 2.4102314023  | 1.4760774152  | -0.5860973170 |
| H | 0 | -2.7771628754 | 2.0757635117  | 2.7030152708  |
| H | 0 | -1.8983183575 | 0.6401888306  | 3.1057978184  |
| C | 0 | 2.4548751216  | -1.1329920892 | -0.8948878388 |
| C | 0 | -3.5389900791 | 1.4748145952  | 0.3355462895  |
| C | 0 | -4.8868649459 | 1.4964229084  | 1.0487586290  |
| C | 0 | -3.7008148843 | 0.8790313688  | -1.0551946268 |
| C | 0 | -3.0153424940 | 2.8980205441  | 0.1757320460  |
| C | 0 | 2.1455621329  | -0.4775213252 | -2.2335517065 |
| C | 0 | 1.8680966217  | -2.5392709470 | -0.9114969640 |
| C | 0 | 3.9656724499  | -1.2004193879 | -0.6998535457 |
| H | 0 | -4.7954683956 | 1.8455303177  | 2.0779298845  |
| H | 0 | -5.5672661252 | 2.1730520548  | 0.5327341241  |
| H | 0 | -5.3524576566 | 0.5112878486  | 1.0625434100  |
| H | 0 | -2.7628019666 | 0.9200085987  | -1.6108056886 |
| H | 0 | -4.0465942860 | -0.1533155175 | -1.0408616150 |
| H | 0 | -4.4394032750 | 1.4570515082  | -1.6096883772 |
| H | 0 | -3.6456956168 | 3.4343250963  | -0.5319537377 |
| H | 0 | -3.0257882075 | 3.4608979031  | 1.1081966181  |
| H | 0 | -1.9958546364 | 2.9021581808  | -0.2128017402 |
| H | 0 | 1.0711205697  | -0.4403735886 | -2.4129345084 |
| H | 0 | 2.5441072857  | 0.5323109879  | -2.3165914137 |
| H | 0 | 2.5968225839  | -1.0667374848 | -3.0309045211 |
| H | 0 | 2.1721157448  | -3.1360954892 | -0.0526263886 |
| H | 0 | 0.7779198320  | -2.5091820549 | -0.9327833646 |
| H | 0 | 2.2068100942  | -3.0622302788 | -1.8042913183 |
| H | 0 | 4.2371551883  | -1.6071748137 | 0.2743387818  |
| H | 0 | 4.4033205889  | -1.8497576327 | -1.4573766493 |
| H | 0 | 4.4294018527  | -0.2197398351 | -0.8022988014 |
| H | 0 | 0.2434039927  | 2.6083253390  | -1.4442019242 |
| H | 0 | -1.0701255973 | 2.2612282286  | -2.1295487706 |
| H | 0 | -1.4324194497 | -0.6039276005 | -2.7937711798 |
| H | 0 | -0.7121201172 | -1.8437945136 | -2.2824123295 |

615

E (SMD/M06-L-D3/def2-TZVP) = -2453.599719 au

H (SMD/M06-L-D3/def2-TZVP) = -2453.047669 au

G (SMD/M06-L-D3/def2-TZVP) = -2453.136702 au

E (SMD/B3LYP\*-D3/def2-TZVP//SMD/M06-L-D3/def2-TZVP) = -2452.909162 au

|    |   |               |               |               |
|----|---|---------------|---------------|---------------|
| Mn | 0 | -0.2231153479 | -0.1669866331 | -0.1946401437 |
| N  | 0 | -2.2077241383 | 0.3815078689  | 1.1391247836  |
| N  | 0 | 2.1527479980  | -0.6787399817 | 0.2669156790  |
| O  | 0 | -0.8631504787 | -1.3396367006 | -1.3031176965 |
| O  | 0 | 0.0621897962  | 1.4306573288  | -1.5312523634 |
| N  | 0 | -0.2759414171 | -1.4836629375 | 1.4635720087  |
| C  | 0 | 0.8432525309  | -2.0562496933 | 1.9133792995  |
| C  | 0 | 2.1437783042  | -1.3860744443 | 1.5610647751  |
| C  | 0 | 0.7773051668  | -3.1273019037 | 2.7909320375  |
| H  | 0 | 1.6880588161  | -3.6004196412 | 3.1330590395  |
| C  | 0 | -0.4654993197 | -3.5492505390 | 3.2340672466  |
| H  | 0 | -0.5420883856 | -4.3839831004 | 3.9185755883  |
| C  | 0 | -1.6069374760 | -2.8715401399 | 2.8359116240  |
| H  | 0 | -2.5826815307 | -3.1368423294 | 3.2196924688  |
| C  | 0 | -1.4782761246 | -1.8262346549 | 1.9366658277  |
| C  | 0 | -2.6404405919 | -0.9844651773 | 1.4827496570  |
| N  | 0 | 0.4843229877  | 1.1810325225  | 1.3000285389  |
| C  | 0 | 1.7785702539  | 1.5229589220  | 1.2903779769  |
| C  | 0 | 2.6770533266  | 0.6898537354  | 0.4244575753  |
| C  | 0 | 2.2464208554  | 2.5554427089  | 2.0862195983  |
| H  | 0 | 3.2959824980  | 2.8151550822  | 2.0698011037  |
| C  | 0 | 1.3492918523  | 3.2255628675  | 2.9013797214  |
| H  | 0 | 1.6848896845  | 4.0505592648  | 3.5160998003  |
| C  | 0 | 0.0319179290  | 2.8030862750  | 2.9640647512  |
| H  | 0 | -0.6769005745 | 3.2654710466  | 3.6376841185  |
| C  | 0 | -0.3690694648 | 1.7457863523  | 2.1634720411  |
| C  | 0 | -1.7011771829 | 1.0774043558  | 2.3375228936  |
| H  | 0 | -3.4024537008 | -0.9975352094 | 2.2702586817  |
| H  | 0 | -3.0921266781 | -1.4399471710 | 0.5999924428  |
| H  | 0 | 2.9661207588  | -2.0978957582 | 1.6522362951  |
| H  | 0 | 2.3196819935  | -0.6559936164 | 2.3566454606  |
| H  | 0 | 3.6841824612  | 0.7061278447  | 0.8558169520  |
| H  | 0 | 2.7546210255  | 1.1491613163  | -0.5619063389 |
| H  | 0 | -2.4259889953 | 1.7838824657  | 2.7457041713  |
| H  | 0 | -1.5560336799 | 0.3402821268  | 3.1325370461  |
| C  | 0 | 2.8535411364  | -1.4605600667 | -0.8203021834 |
| C  | 0 | -3.2582876951 | 1.1938024559  | 0.4136126591  |
| C  | 0 | -4.5664864108 | 1.2384164907  | 1.1972586269  |
| C  | 0 | -3.5147001446 | 0.6031032503  | -0.9647970493 |
| C  | 0 | -2.7134906468 | 2.6039367212  | 0.2160607389  |
| C  | 0 | 2.5369923455  | -0.8323817893 | -2.1705263221 |

|   |   |               |               |               |
|---|---|---------------|---------------|---------------|
| C | 0 | 2.3072288189  | -2.8833262891 | -0.8172903718 |
| C | 0 | 4.3639220480  | -1.4865062934 | -0.6050213899 |
| H | 0 | -4.4251546600 | 1.5937192373  | 2.2182463757  |
| H | 0 | -5.2626629571 | 1.9192421825  | 0.7085326868  |
| H | 0 | -5.0431132201 | 0.2592004117  | 1.2401794149  |
| H | 0 | -2.6208620117 | 0.6491640618  | -1.5858590095 |
| H | 0 | -3.8545457617 | -0.4309029072 | -0.9304430355 |
| H | 0 | -4.2963625253 | 1.1829071550  | -1.4550263897 |
| H | 0 | -3.3796395112 | 3.1543305887  | -0.4467593399 |
| H | 0 | -2.6445529952 | 3.1693255810  | 1.1446333847  |
| H | 0 | -1.7266057883 | 2.5771366594  | -0.2492600908 |
| H | 0 | 1.4632888960  | -0.8331539645 | -2.3568901225 |
| H | 0 | 2.9036952108  | 0.1891347349  | -2.2623204941 |
| H | 0 | 3.0176849661  | -1.4152450278 | -2.9557116098 |
| H | 0 | 2.6151703863  | -3.4518629413 | 0.0595507816  |
| H | 0 | 1.2175489396  | -2.8836903441 | -0.8682538733 |
| H | 0 | 2.6844090096  | -3.4122635328 | -1.6912673977 |
| H | 0 | 4.6297359603  | -1.8602825522 | 0.3843969521  |
| H | 0 | 4.8273691019  | -2.1460410413 | -1.3380340921 |
| H | 0 | 4.8083981751  | -0.4991166310 | -0.7272428315 |
| O | 0 | -0.2518378181 | 1.2757503972  | -2.8005626795 |

64

E (SMD/M06-L-D3/def2-TZVP) = -2380.176815 au

H (SMD/M06-L-D3/def2-TZVP) = -2379.594892 au

G (SMD/M06-L-D3/def2-TZVP) = -2379.68748 au

E (SMD/B3LYP\*-D3/def2-TZVP//SMD/M06-L-D3/def2-TZVP) = -2379.508941 au

|    |   |               |               |               |
|----|---|---------------|---------------|---------------|
| Mn | 0 | -0.5433312043 | 0.1727096596  | -0.4206472961 |
| N  | 0 | -2.5375337680 | 0.7174319687  | 1.0708765281  |
| N  | 0 | 1.8055450623  | -0.3390819582 | 0.2079963444  |
| O  | 0 | -1.2850901158 | -1.1686541002 | -1.7682789695 |
| O  | 0 | -0.2089683594 | 1.9346043327  | -2.0297165331 |
| N  | 0 | -0.6231289811 | -1.1635169912 | 1.3810087647  |
| C  | 0 | 0.4871478189  | -1.7503224132 | 1.8269944350  |
| C  | 0 | 1.7853999859  | -1.0609831869 | 1.4973965316  |
| C  | 0 | 0.4149748912  | -2.8454658349 | 2.6753897789  |
| H  | 0 | 1.3191556967  | -3.3321598351 | 3.0170113642  |
| C  | 0 | -0.8355036813 | -3.2766923471 | 3.0917757460  |
| H  | 0 | -0.9208949563 | -4.1290828476 | 3.7534569807  |
| C  | 0 | -1.9733117727 | -2.5889681271 | 2.6979378357  |
| H  | 0 | -2.9527863251 | -2.8671510398 | 3.0637470084  |
| C  | 0 | -1.8275947059 | -1.5180564977 | 1.8289835905  |
| C  | 0 | -2.9778129569 | -0.6546606141 | 1.3775716251  |
| N  | 0 | 0.1499977433  | 1.5372061758  | 1.2453306123  |

|   |   |               |               |               |
|---|---|---------------|---------------|---------------|
| C | 0 | 1.4459648893  | 1.8553249196  | 1.2656789217  |
| C | 0 | 2.3378851316  | 1.0260202289  | 0.3823074986  |
| C | 0 | 1.9268924682  | 2.8439678495  | 2.1101793842  |
| H | 0 | 2.9810498495  | 3.0867443651  | 2.1201455417  |
| C | 0 | 1.0301476789  | 3.4900300673  | 2.9469152489  |
| H | 0 | 1.3717298222  | 4.2812385806  | 3.6018359200  |
| C | 0 | -0.2929849543 | 3.0807827612  | 2.9831503449  |
| H | 0 | -0.9980800203 | 3.5184406099  | 3.6777535126  |
| C | 0 | -0.6977420535 | 2.0645502743  | 2.1294273782  |
| C | 0 | -2.0333653967 | 1.3868699793  | 2.2795413247  |
| H | 0 | -3.7555587921 | -0.6845845872 | 2.1503420207  |
| H | 0 | -3.4206116928 | -1.0869111647 | 0.4782528936  |
| H | 0 | 2.6172037489  | -1.7620410160 | 1.5913470427  |
| H | 0 | 1.9426877459  | -0.3347111909 | 2.3002453941  |
| H | 0 | 3.3470031694  | 1.0303418913  | 0.8102380388  |
| H | 0 | 2.4163793996  | 1.4951394627  | -0.5996825033 |
| H | 0 | -2.7614290338 | 2.0806568308  | 2.7065110795  |
| H | 0 | -1.8851162527 | 0.6317903274  | 3.0570537905  |
| C | 0 | 2.5132491844  | -1.1182632908 | -0.8762372999 |
| C | 0 | -3.5746922601 | 1.5429350849  | 0.3505212770  |
| C | 0 | -4.9029995335 | 1.5654206002  | 1.1008990534  |
| C | 0 | -3.7862313073 | 0.9881088524  | -1.0499494844 |
| C | 0 | -3.0379592720 | 2.9623221085  | 0.2014044075  |
| C | 0 | 2.2284533991  | -0.4735855890 | -2.2264145847 |
| C | 0 | 1.9391515381  | -2.5298035767 | -0.8980753630 |
| C | 0 | 4.0203171375  | -1.1745813307 | -0.6447340734 |
| H | 0 | -4.7826469030 | 1.8919314504  | 2.1344388369  |
| H | 0 | -5.5898376120 | 2.2589733396  | 0.6165674843  |
| H | 0 | -5.3784997445 | 0.5848167331  | 1.1066771570  |
| H | 0 | -2.8627249303 | 1.0382340240  | -1.6282747909 |
| H | 0 | -4.1369385944 | -0.0427122554 | -1.0549522934 |
| H | 0 | -4.5380525022 | 1.5874819926  | -1.5628770991 |
| H | 0 | -3.6957099070 | 3.5278083128  | -0.4569896650 |
| H | 0 | -2.9852139203 | 3.5013914849  | 1.1463316564  |
| H | 0 | -2.0426326368 | 2.9563770581  | -0.2458892021 |
| H | 0 | 1.1551993698  | -0.4319329399 | -2.4186187431 |
| H | 0 | 2.6357735073  | 0.5325448497  | -2.3131181970 |
| H | 0 | 2.6869347809  | -1.0727384393 | -3.0124635574 |
| H | 0 | 2.2114692116  | -3.1105605080 | -0.0175624645 |
| H | 0 | 0.8511210627  | -2.5056983069 | -0.9764258869 |
| H | 0 | 2.3259772905  | -3.0615001066 | -1.7662724672 |
| H | 0 | 4.2689752430  | -1.5747157395 | 0.3386185746  |
| H | 0 | 4.4820329844  | -1.8251448708 | -1.3869178841 |
| H | 0 | 4.4818319604  | -0.1920080366 | -0.7395355049 |

|   |   |               |               |               |
|---|---|---------------|---------------|---------------|
| H | 0 | -0.4218077404 | 2.8063094684  | -1.6749141811 |
| H | 0 | -0.9143587919 | 1.7604440118  | -2.6654395385 |
| H | 0 | -1.0154420930 | -0.8985319136 | -2.6517933458 |

**716**

E (SMD/M06-L-D3/def2-TZVP) = -2453.449387 au

H (SMD/M06-L-D3/def2-TZVP) = -2452.895941 au

G (SMD/M06-L-D3/def2-TZVP) = -2452.98571 au

E (SMD/B3LYP\*-D3/def2-TZVP//SMD/M06-L-D3/def2-TZVP) = -2452.751217 au

|    |   |               |               |               |
|----|---|---------------|---------------|---------------|
| Mn | 0 | -0.2252773471 | -0.1901279258 | -0.0994231283 |
| N  | 0 | -2.1705737276 | 0.3377708810  | 1.1323530642  |
| N  | 0 | 2.0978363543  | -0.6712707290 | 0.2876749817  |
| O  | 0 | -0.8524550232 | -1.3415253613 | -1.2005673648 |
| O  | 0 | 0.6537389166  | 2.0579749653  | -1.8465884196 |
| N  | 0 | -0.2647758953 | -1.4962475350 | 1.5573848086  |
| C  | 0 | 0.8599658399  | -2.0709726551 | 1.9783811490  |
| C  | 0 | 2.1441705734  | -1.3953773842 | 1.5805052319  |
| C  | 0 | 0.8043707246  | -3.1451451118 | 2.8519405701  |
| H  | 0 | 1.7160567124  | -3.6250063185 | 3.1815997399  |
| C  | 0 | -0.4370828376 | -3.5647111802 | 3.3048049571  |
| H  | 0 | -0.5066113876 | -4.4011518324 | 3.9879261818  |
| C  | 0 | -1.5871870367 | -2.8950492017 | 2.9142548746  |
| H  | 0 | -2.5591380215 | -3.1738774232 | 3.2978419485  |
| C  | 0 | -1.4659818277 | -1.8461144111 | 2.0186024586  |
| C  | 0 | -2.6220891332 | -1.0133567122 | 1.5310139774  |
| N  | 0 | 0.4766606185  | 1.1954983238  | 1.3204346015  |
| C  | 0 | 1.7731848719  | 1.5306308359  | 1.3166293608  |
| C  | 0 | 2.6571276303  | 0.6893285542  | 0.4472491134  |
| C  | 0 | 2.2401432597  | 2.5557557502  | 2.1205055695  |
| H  | 0 | 3.2901911236  | 2.8131380621  | 2.1118394677  |
| C  | 0 | 1.3395413260  | 3.2212739309  | 2.9369696762  |
| H  | 0 | 1.6755833718  | 4.0393403942  | 3.5604678090  |
| C  | 0 | 0.0197355190  | 2.8044783510  | 2.9921466503  |
| H  | 0 | -0.6885064917 | 3.2639051367  | 3.6679794018  |
| C  | 0 | -0.3805181916 | 1.7551487426  | 2.1815642506  |
| C  | 0 | -1.7085589089 | 1.0805456929  | 2.3318600763  |
| H  | 0 | -3.3853345468 | -0.9762068919 | 2.3148477972  |
| H  | 0 | -3.0767162023 | -1.4989121090 | 0.6665729631  |
| H  | 0 | 2.9719185985  | -2.1041975409 | 1.6217568971  |
| H  | 0 | 2.3537990586  | -0.6698182410 | 2.3713642308  |
| H  | 0 | 3.6633577382  | 0.6722198132  | 0.8774832884  |
| H  | 0 | 2.7474740804  | 1.1484533236  | -0.5373297753 |
| H  | 0 | -2.4575075337 | 1.7883956294  | 2.6872128456  |
| H  | 0 | -1.5855333856 | 0.3674087629  | 3.1515304642  |

|   |   |               |               |               |
|---|---|---------------|---------------|---------------|
| C | 0 | 2.7587494304  | -1.4461368727 | -0.8370698011 |
| C | 0 | -3.2112691589 | 1.1312248330  | 0.3587298715  |
| C | 0 | -4.5230809746 | 1.2275136896  | 1.1300545808  |
| C | 0 | -3.4715957715 | 0.4833799561  | -0.9919235108 |
| C | 0 | -2.6327937257 | 2.5173738436  | 0.1033863776  |
| C | 0 | 2.4123764106  | -0.7788627423 | -2.1604151299 |
| C | 0 | 2.1945733289  | -2.8608387220 | -0.8387173593 |
| C | 0 | 4.2736219154  | -1.4935891899 | -0.6685460814 |
| H | 0 | -4.3929662842 | 1.6297815406  | 2.1342824801  |
| H | 0 | -5.2048023792 | 1.8916386751  | 0.6002639263  |
| H | 0 | -5.0110642462 | 0.2566361499  | 1.2122467291  |
| H | 0 | -2.5751684827 | 0.4893697045  | -1.6091957935 |
| H | 0 | -3.8253254335 | -0.5432816967 | -0.9131242243 |
| H | 0 | -4.2444079673 | 1.0536154791  | -1.5063694150 |
| H | 0 | -3.2777348935 | 3.0536467855  | -0.5908766013 |
| H | 0 | -2.5556868522 | 3.1225600139  | 1.0058436315  |
| H | 0 | -1.6422897352 | 2.4431207473  | -0.3501123840 |
| H | 0 | 1.3326302061  | -0.6934585593 | -2.2843424271 |
| H | 0 | 2.8556557668  | 0.2104519250  | -2.2639847329 |
| H | 0 | 2.7982190973  | -1.3865373461 | -2.9781977222 |
| H | 0 | 2.5168751446  | -3.4422987002 | 0.0242973482  |
| H | 0 | 1.1045411281  | -2.8465971084 | -0.8657508669 |
| H | 0 | 2.5474006228  | -3.3831668341 | -1.7266198813 |
| H | 0 | 4.5674110099  | -1.9084704103 | 0.2958260285  |
| H | 0 | 4.7026367127  | -2.1308149688 | -1.4409973089 |
| H | 0 | 4.7259294778  | -0.5077086223 | -0.7705040570 |
| O | 0 | -0.2319771667 | 1.6242588444  | -2.5409773954 |

### <sup>32</sup>(CF3)

E (SMD/M06-L-D3/def2-TZVP) = -2737.965014 au

H (SMD/M06-L-D3/def2-TZVP) = -2737.635287 au

G (SMD/M06-L-D3/def2-TZVP) = -2737.713451 au

E (SMD/B3LYP\*-D3/def2-TZVP//SMD/M06-L-D3/def2-TZVP) = -2737.255255 au

|    |   |               |               |               |
|----|---|---------------|---------------|---------------|
| Mn | 0 | -0.0127598944 | -1.4333508673 | -0.0172807602 |
| N  | 0 | 2.1284006586  | -0.8274657717 | -0.0200884940 |
| N  | 0 | -2.1311207259 | -0.8112478144 | 0.0026384670  |
| O  | 0 | -0.0369319571 | -2.3531099980 | -1.3694060864 |
| O  | 0 | -0.0007851357 | -2.3934757497 | 1.3065892281  |
| N  | 0 | -0.0078435112 | 0.2579716768  | -1.2757879473 |
| C  | 0 | -1.1787961120 | 0.7999208848  | -1.6073627172 |
| C  | 0 | -2.3673794043 | -0.0286918165 | -1.2601857453 |
| C  | 0 | -1.2301462300 | 2.0053129681  | -2.2817063084 |
| H  | 0 | -2.1841081486 | 2.4411180719  | -2.5417569621 |
| C  | 0 | -0.0342193532 | 2.6310166817  | -2.5994000656 |

|   |   |               |               |               |
|---|---|---------------|---------------|---------------|
| H | 0 | -0.0445099090 | 3.5809900815  | -3.1160912617 |
| C | 0 | 1.1737414413  | 2.0488466620  | -2.2506027434 |
| H | 0 | 2.1177080993  | 2.5185774442  | -2.4873921929 |
| C | 0 | 1.1497251280  | 0.8406763323  | -1.5762895567 |
| C | 0 | 2.3663646038  | 0.0602031690  | -1.2117428880 |
| N | 0 | 0.0125474584  | 0.2248036385  | 1.2848845471  |
| C | 0 | -1.1397618463 | 0.8119420264  | 1.5974009976  |
| C | 0 | -2.3623606451 | 0.0499469971  | 1.2161496980  |
| C | 0 | -1.1539558228 | 2.0075578768  | 2.2936896619  |
| H | 0 | -2.0939639224 | 2.4810158176  | 2.5386315769  |
| C | 0 | 0.0589274388  | 2.5733102073  | 2.6523576380  |
| H | 0 | 0.0773713311  | 3.5140343493  | 3.1855132918  |
| C | 0 | 1.2491666774  | 1.9433083030  | 2.3224854184  |
| H | 0 | 2.2069287947  | 2.3665504659  | 2.5892468222  |
| C | 0 | 1.1878241738  | 0.7510315940  | 1.6257905098  |
| C | 0 | 2.3699467675  | -0.0786472475 | 1.2603528709  |
| H | 0 | 3.2213965083  | 0.7076039480  | -1.0193620793 |
| H | 0 | 2.6217107910  | -0.5795485080 | -2.0571851029 |
| H | 0 | -2.5336538473 | -0.7452055331 | -2.0655093261 |
| H | 0 | -3.2681505716 | 0.5744255053  | -1.1550359226 |
| H | 0 | -3.2121289251 | 0.7080802194  | 1.0385198712  |
| H | 0 | -2.6222811206 | -0.6085653511 | 2.0455969300  |
| H | 0 | 2.5283866429  | -0.8152899755 | 2.0488967053  |
| H | 0 | 3.2756152146  | 0.5199031481  | 1.1722097438  |
| C | 0 | 3.0318496865  | -1.9721740806 | -0.0858193934 |
| C | 0 | -3.0519092056 | -1.9456949524 | 0.0398888666  |
| F | 0 | -2.8724225419 | -2.6587821328 | 1.1379794351  |
| F | 0 | -4.3219120152 | -1.5260694121 | 0.0262318332  |
| F | 0 | -2.8711688233 | -2.7285639004 | -1.0092001650 |
| F | 0 | 2.8432988936  | -2.7770079854 | 0.9458168309  |
| F | 0 | 2.8389459444  | -2.6578172484 | -1.1995811625 |
| F | 0 | 4.3089204144  | -1.5734514242 | -0.0666366830 |

**$^5\text{TS}''_{2-14}(\text{H})$**

E (SMD/M06-L-D3/def2-TZVP) = -2292.5906 au

H (SMD/M06-L-D3/def2-TZVP) = -2292.208969 au

G (SMD/M06-L-D3/def2-TZVP) = -2292.291321 au

E (SMD/B3LYP\*-D3/def2-TZVP//SMD/M06-L-D3/def2-TZVP) = -2292.024177 au

|    |   |               |               |               |
|----|---|---------------|---------------|---------------|
| Mn | 0 | -0.3012558353 | -0.0643178923 | -0.4797174408 |
| N  | 0 | -2.2125412524 | 0.3556524021  | 0.7537760726  |
| N  | 0 | 1.9489010163  | -0.5127127593 | -0.1968590138 |
| O  | 0 | -0.8256274647 | -1.2842766726 | -1.5496268644 |
| O  | 0 | -0.0967111259 | 1.3574140436  | -1.5764358154 |
| N  | 0 | -0.1834875630 | -1.4074508631 | 1.2388788395  |

|   |   |               |               |               |
|---|---|---------------|---------------|---------------|
| C | 0 | 0.9979613786  | -1.9429251714 | 1.5564617918  |
| C | 0 | 2.0835363713  | -1.7738624029 | 0.5342470659  |
| C | 0 | 1.1760672110  | -2.6153461379 | 2.7540787740  |
| H | 0 | 2.1413135908  | -3.0386301247 | 2.9965312505  |
| C | 0 | 0.1064191509  | -2.7077812916 | 3.6296156513  |
| H | 0 | 0.2227476922  | -3.2172066938 | 4.5772006027  |
| C | 0 | -1.1028426730 | -2.1180470918 | 3.3011201229  |
| H | 0 | -1.9462979462 | -2.1462259060 | 3.9774722138  |
| C | 0 | -1.2131680790 | -1.4623636434 | 2.0857008125  |
| C | 0 | -2.4758951725 | -0.7972336597 | 1.6245715360  |
| N | 0 | 0.3344517489  | 1.2550476393  | 1.1073626376  |
| C | 0 | 1.6339228523  | 1.3249783887  | 1.4095174991  |
| C | 0 | 2.5653170295  | 0.6495424210  | 0.4477302793  |
| C | 0 | 2.0645837975  | 2.0011007693  | 2.5389061744  |
| H | 0 | 3.1197228867  | 2.0411124238  | 2.7723547961  |
| C | 0 | 1.1205091082  | 2.5963196671  | 3.3589245107  |
| H | 0 | 1.4312519489  | 3.1222039519  | 4.2521230270  |
| C | 0 | -0.2251570726 | 2.4915093113  | 3.0469999033  |
| H | 0 | -0.9868461665 | 2.9204497341  | 3.6834954214  |
| C | 0 | -0.5896634874 | 1.8006365270  | 1.9038421729  |
| C | 0 | -2.0107485032 | 1.6264489150  | 1.4619094246  |
| H | 0 | -3.0905563739 | -0.5220173125 | 2.4858773927  |
| H | 0 | -3.0519422509 | -1.5199153247 | 1.0424943554  |
| H | 0 | 2.0032289238  | -2.5851744200 | -0.1928583942 |
| H | 0 | 3.0636954239  | -1.8695589138 | 1.0098918111  |
| H | 0 | 3.4990333143  | 0.3882190314  | 0.9537461788  |
| H | 0 | 2.8223042078  | 1.3622557152  | -0.3401353680 |
| H | 0 | -2.2559013452 | 2.4300404282  | 0.7628755002  |
| H | 0 | -2.6860848190 | 1.7292091452  | 2.3154842897  |
| O | 0 | -0.4110047425 | 0.9090638464  | -3.3518430265 |
| H | 0 | -0.6261588318 | 0.0096926961  | -3.0274016411 |
| O | 0 | 2.3540691054  | 0.2711372155  | -3.1400723491 |
| H | 0 | 2.7554035856  | 1.0281902753  | -2.6997882313 |
| H | 0 | 1.4071692571  | 0.5187786053  | -3.1989558151 |
| O | 0 | -2.9757036529 | 1.7577497607  | -2.4732145155 |
| H | 0 | -2.0831337222 | 1.4939059824  | -2.7779670900 |
| H | 0 | -2.8030122854 | 2.1539116913  | -1.6124324566 |
| H | 0 | -2.9899488441 | 0.4656714376  | 0.1161487502  |
| H | 0 | 2.3127063684  | -0.5999893432 | -1.1404942764 |

### <sup>32</sup>(H)

E (SMD/M06-L-D3/def2-TZVP) = -2063.722238 au

H (SMD/M06-L-D3/def2-TZVP) = -2063.406719 au

G (SMD/M06-L-D3/def2-TZVP) = -2063.468796 au

E (SMD/B3LYP\*-D3/def2-TZVP//SMD/M06-L-D3/def2-TZVP) = -2063.210588 au

|    |   |               |               |               |
|----|---|---------------|---------------|---------------|
| Mn | 0 | -0.5157620857 | 0.2195529244  | -0.2197655615 |
| N  | 0 | -2.3751434238 | 0.5843282189  | 0.7455633201  |
| N  | 0 | 1.5727238855  | -0.1663413799 | -0.0169099456 |
| O  | 0 | -0.9396000777 | -1.1066031839 | -1.1002314702 |
| O  | 0 | -0.4519638515 | 1.5474756074  | -1.1928280289 |
| N  | 0 | -0.4420343533 | -1.0811273445 | 1.4251149747  |
| C  | 0 | 0.7072834478  | -1.6905505944 | 1.7060371286  |
| C  | 0 | 1.7771969622  | -1.4557267299 | 0.6924944075  |
| C  | 0 | 0.7996550251  | -2.5204112569 | 2.8093980315  |
| H  | 0 | 1.7335567299  | -3.0110507256 | 3.0445966825  |
| C  | 0 | -0.3310734193 | -2.7009446060 | 3.5919467385  |
| H  | 0 | -0.2834412166 | -3.3371941602 | 4.4655584681  |
| C  | 0 | -1.5243229877 | -2.0771860379 | 3.2598341295  |
| H  | 0 | -2.4192195193 | -2.2192588729 | 3.8490403607  |
| C  | 0 | -1.5477294002 | -1.2603007569 | 2.1434014851  |
| C  | 0 | -2.7529576399 | -0.5906460764 | 1.5727842672  |
| N  | 0 | 0.0310104081  | 1.4725886315  | 1.3699836742  |
| C  | 0 | 1.3231992368  | 1.6098994060  | 1.6591043076  |
| C  | 0 | 2.2325428667  | 0.9816402106  | 0.6570879253  |
| C  | 0 | 1.7121363287  | 2.3434979411  | 2.7657859735  |
| H  | 0 | 2.7602294449  | 2.4471679889  | 3.0085265158  |
| C  | 0 | 0.7262012144  | 2.9282937808  | 3.5464923736  |
| H  | 0 | 1.0029417815  | 3.4952358826  | 4.4253269856  |
| C  | 0 | -0.6120691810 | 2.7907107630  | 3.2095543891  |
| H  | 0 | -1.3936809173 | 3.2464877093  | 3.8007083651  |
| C  | 0 | -0.9323470110 | 2.0426285512  | 2.0907681833  |
| C  | 0 | -2.2985323805 | 1.8469968023  | 1.5246889364  |
| H  | 0 | -3.4654276582 | -0.3015122358 | 2.3457614325  |
| H  | 0 | -3.2589844528 | -1.3008189446 | 0.9163225131  |
| H  | 0 | 1.7196724031  | -2.2497882062 | -0.0544428445 |
| H  | 0 | 2.7742029883  | -1.4986100965 | 1.1318325290  |
| H  | 0 | 3.1797979255  | 0.6741828368  | 1.1010608393  |
| H  | 0 | 2.4607246392  | 1.7223695610  | -0.1113511692 |
| H  | 0 | -2.5063793778 | 2.6675818804  | 0.8356460150  |
| H  | 0 | -3.0689469756 | 1.8682189995  | 2.2960602724  |
| H  | 0 | -3.0886549352 | 0.7033074718  | 0.0348104626  |
| H  | 0 | 1.9785824172  | -0.2550009089 | -0.9418323977 |

### <sup>3</sup>2(Me)

E (SMD/M06-L-D3/def2-TZVP) = -2142.34550212 au

H (SMD/M06-L-D3/def2-TZVP) = -2141.972002 au

G (SMD/M06-L-D3/def2-TZVP) = -2142.039629 au

E (SMD/B3LYP\*-D3/def2-TZVP//SMD/M06-L-D3/def2-TZVP) = -2141.79559162 au

|    |   |               |               |               |
|----|---|---------------|---------------|---------------|
| Mn | 0 | -0.5079435395 | 0.2233536418  | -0.1872676749 |
| N  | 0 | -2.3935820323 | 0.6721679652  | 0.7464607848  |
| N  | 0 | 1.5838942343  | -0.2524828783 | -0.0284914772 |
| O  | 0 | -0.9885423684 | -1.0809033169 | -1.0712474176 |
| O  | 0 | -0.3770462205 | 1.5525259756  | -1.1539041939 |
| N  | 0 | -0.4815503019 | -1.0551709156 | 1.4701821952  |
| C  | 0 | 0.6630739567  | -1.6539979765 | 1.7883011815  |
| C  | 0 | 1.7103918687  | -1.5308288423 | 0.7343301423  |
| C  | 0 | 0.7637096838  | -2.3769182053 | 2.9638284122  |
| H  | 0 | 1.6928168401  | -2.8619830569 | 3.2274024335  |
| C  | 0 | -0.3528718609 | -2.4534254767 | 3.7836290108  |
| H  | 0 | -0.2978314990 | -3.0013965188 | 4.7146707536  |
| C  | 0 | -1.5394123085 | -1.8335877127 | 3.4198370009  |
| H  | 0 | -2.4206717419 | -1.8911257895 | 4.0427602354  |
| C  | 0 | -1.5712600845 | -1.1284712830 | 2.2296764757  |
| C  | 0 | -2.7676165421 | -0.4821516276 | 1.6178774378  |
| N  | 0 | 0.0839872601  | 1.4324769065  | 1.4142809561  |
| C  | 0 | 1.3753014432  | 1.4703587160  | 1.7329726356  |
| C  | 0 | 2.2611518021  | 0.8632775629  | 0.6989199080  |
| C  | 0 | 1.7846291513  | 2.1028018806  | 2.8935204481  |
| H  | 0 | 2.8322272138  | 2.1312804433  | 3.1575102386  |
| C  | 0 | 0.8174066095  | 2.6842317049  | 3.7002471360  |
| H  | 0 | 1.1091996741  | 3.1729232400  | 4.6201946439  |
| C  | 0 | -0.5213534334 | 2.6411689511  | 3.3389388764  |
| H  | 0 | -1.2872432708 | 3.0929363780  | 3.9531715811  |
| C  | 0 | -0.8612321086 | 1.9931564078  | 2.1646545180  |
| C  | 0 | -2.2226816282 | 1.9112348371  | 1.5627704725  |
| H  | 0 | -3.4998023521 | -0.1660995310 | 2.3624339188  |
| H  | 0 | -3.2542089573 | -1.2209900147 | 0.9777890844  |
| H  | 0 | 1.5634688166  | -2.3445243237 | 0.0209177109  |
| H  | 0 | 2.7209993178  | -1.6287294340 | 1.1335623306  |
| H  | 0 | 3.2102055414  | 0.5181548342  | 1.1116699495  |
| H  | 0 | 2.4900071636  | 1.6345647052  | -0.0393414330 |
| H  | 0 | -2.3409773454 | 2.7600012139  | 0.8860210065  |
| H  | 0 | -3.0155628258 | 1.9786243610  | 2.3092900637  |
| C  | 0 | -3.4514134846 | 0.8898002147  | -0.2575321884 |
| H  | 0 | -3.5638780651 | -0.0087530950 | -0.8577744910 |
| H  | 0 | -4.4003181024 | 1.1173521918  | 0.2329914143  |
| H  | 0 | -3.1699639826 | 1.7208653694  | -0.8982568431 |
| C  | 0 | 2.2022151860  | -0.4145543367 | -1.3570578634 |
| H  | 0 | 2.1001331968  | 0.5126932222  | -1.9140221290 |
| H  | 0 | 3.2615590319  | -0.6604174843 | -1.2566552934 |
| H  | 0 | 1.6969055344  | -1.2145542437 | -1.8909334515 |

**O2**

E (SMD/M06-L-D3/def2-TZVP) = -150.37011 au  
H (SMD/M06-L-D3/def2-TZVP) = -150.363042 au  
G (SMD/M06-L-D3/def2-TZVP) = -150.386312 au  
E (SMD/B3LYP\*-D3/def2-TZVP//SMD/M06-L-D3/def2-TZVP) = -150.318089 au  
O 0 -1.4277338185 -3.1467661200 0.0000000000  
O 0 -2.6318762415 -3.1467661200 0.0000000000

**72**

E (SMD/M06-L-D3/def2-TZVP) = -2378.209725 au  
H (SMD/M06-L-D3/def2-TZVP) = -2377.662277 au  
G (SMD/M06-L-D3/def2-TZVP) = -2377.74899 au  
E (SMD/B3LYP\*-D3/def2-TZVP//SMD/M06-L-D3/def2-TZVP) = -2377.533709 au  
Mn 0 0.0342556246 -0.0297470932 0.9198140792  
N 0 0.1783668407 -1.3261009756 -0.7255882811  
N 0 2.2481003284 0.3897825230 0.0556251481  
N 0 -0.1577048440 1.4310095456 -0.5445038754  
N 0 -2.2303951856 -0.3820221508 0.0433111764  
O 0 -0.1088924567 1.1688556793 2.2828894705  
O 0 0.0588592621 -1.0191752586 2.6241699655  
C 0 -0.8655261218 -2.1176812760 -1.0135164012  
C 0 -0.7482699367 -3.1218368006 -1.9575874669  
C 0 0.4637265239 -3.2887799439 -2.6065842026  
C 0 1.5022458665 -2.4080468560 -2.3587621070  
C 0 1.3205421744 -1.4052866339 -1.4211899644  
C 0 2.3016041187 -0.2845888242 -1.2551614649  
C 0 2.1805002115 1.8520313990 -0.1078744221  
C 0 0.8823569337 2.2522588073 -0.7474387660  
C 0 0.7467881974 3.3662587380 -1.5561844827  
C 0 -0.4782267620 3.6103532475 -2.1550117046  
C 0 -1.5132645571 2.7045426039 -1.9986078166  
C 0 -1.3146506079 1.5914348900 -1.1990177151  
C 0 -2.2940122355 0.4532481360 -1.1670753860  
C 0 -2.1465197009 -1.8123655231 -0.2994451647  
C 0 -3.3343169699 -0.0662390725 1.0287929584  
C 0 -4.6931980875 -0.5263416438 0.5105812866  
C 0 -3.0364705926 -0.7588481359 2.3507445222  
C 0 -3.3491665997 1.4401117354 1.2582796370  
C 0 3.3439356634 -0.0804593068 0.9897717524  
C 0 4.7155020993 0.3861404800 0.5147947589  
C 0 3.2808627526 -1.6013703320 1.0461731549  
C 0 3.0893895766 0.4426474219 2.3950389969  
H 0 3.0978651208 1.5298111188 2.4579054626  
H 0 2.1357228762 0.0841377850 2.7802800114

|   |   |               |               |               |
|---|---|---------------|---------------|---------------|
| H | 0 | 3.8791312253  | 0.0778942582  | 3.0506307928  |
| H | 0 | -1.6003077262 | -3.7487278856 | -2.1807301496 |
| H | 0 | 0.5857267407  | -4.0812013608 | -3.3331747902 |
| H | 0 | 2.4384717779  | -2.4738940559 | -2.8957679094 |
| H | 0 | 3.3064346523  | -0.6280897557 | -1.5038890109 |
| H | 0 | 2.0535028080  | 0.4426600949  | -2.0336985750 |
| H | 0 | 3.0043762113  | 2.2464712438  | -0.7116379592 |
| H | 0 | 2.2585127550  | 2.3182353323  | 0.8747553461  |
| H | 0 | 1.5950826182  | 4.0165495190  | -1.7185550894 |
| H | 0 | -0.6132802166 | 4.4858632169  | -2.7762584741 |
| H | 0 | -2.4588186815 | 2.8343457333  | -2.5071854085 |
| H | 0 | -3.3008708664 | 0.8249323824  | -1.3622598509 |
| H | 0 | -2.0522855344 | -0.1665212235 | -2.0356140297 |
| H | 0 | -2.9830858214 | -2.1473194913 | -0.9213545934 |
| H | 0 | -2.1883097047 | -2.3935960478 | 0.6229682480  |
| H | 0 | -5.4710427147 | -0.2190222799 | 1.2087137764  |
| H | 0 | -4.9337995510 | -0.0883768151 | -0.4583437492 |
| H | 0 | -4.7453315665 | -1.6108473355 | 0.4191752274  |
| H | 0 | -3.1180099476 | -1.8428020822 | 2.2896836077  |
| H | 0 | -2.0372671179 | -0.5042279968 | 2.7095556816  |
| H | 0 | -3.7534100834 | -0.4259608673 | 3.1004287564  |
| H | 0 | -4.0403531827 | 1.6717087185  | 2.0670341844  |
| H | 0 | -2.3616175507 | 1.8029990575  | 1.5453654132  |
| H | 0 | -3.6839501202 | 1.9944670965  | 0.3821390567  |
| H | 0 | 5.4864659213  | -0.0291282574 | 1.1626988319  |
| H | 0 | 4.9365908660  | 0.0628210332  | -0.5022055417 |
| H | 0 | 4.8037251743  | 1.4716427294  | 0.5547275892  |
| H | 0 | 3.9720191186  | -1.9619136578 | 1.8062416652  |
| H | 0 | 2.2773583727  | -1.9337510869 | 1.3229826206  |
| H | 0 | 3.5583786314  | -2.0768945004 | 0.1061201739  |

**<sup>5</sup>TS''<sub>2-14</sub>(CF3)**

E (SMD/M06-L-D3/def2-TZVP) = -2966.852922 au

H (SMD/M06-L-D3/def2-TZVP) = -2966.45784 au

G (SMD/M06-L-D3/def2-TZVP) = -2966.556207 au

E (SMD/B3LYP\*-D3/def2-TZVP//SMD/M06-L-D3/def2-TZVP) = -2966.086465 au

Mn -0.05477200 0.64002600 -0.31913900

N -2.34463700 -0.22182900 0.02575200

N 2.29253500 -0.24748000 -0.29460000

O -0.13566500 1.38664000 -1.81388700

O 0.13077000 1.89975500 0.89763200

N -0.10910300 -1.41630600 -1.17875000

C 1.00903100 -2.13817700 -1.29455000

C 2.33635200 -1.45967600 -1.13416400

C 0.97176700 -3.49336700 -1.58879100  
H 1.89866600 -4.04414700 -1.67170200  
C -0.25143300 -4.11323800 -1.74804900  
H -0.30584400 -5.17052500 -1.96968700  
C -1.40766100 -3.37102800 -1.58031400  
H -2.38625100 -3.82419500 -1.65457900  
C -1.29947200 -2.02441800 -1.28640900  
C -2.51852600 -1.18188000 -1.08661800  
N 0.06840700 -0.77109800 1.36248000  
C 1.27663900 -1.22454000 1.72572100  
C 2.46853700 -0.52633300 1.14953400  
C 1.41655200 -2.28625500 2.60021200  
H 2.40528200 -2.63191300 2.86747100  
C 0.27740600 -2.89828100 3.09593400  
H 0.35876900 -3.73607100 3.77520500  
C -0.96339000 -2.44993600 2.68604700  
H -1.87489900 -2.92355100 3.02358000  
C -1.03408100 -1.38025200 1.80638000  
C -2.36628100 -0.85626400 1.36232400  
H -3.38828700 -1.81955900 -0.91458600  
H -2.70057400 -0.60735200 -1.99512100  
H 2.69168500 -1.17928600 -2.12599300  
H 3.06239800 -2.17183400 -0.73430600  
H 3.36644000 -1.12389000 1.32118100  
H 2.59864900 0.42991300 1.65900900  
H -2.68841700 -0.10689200 2.08669600  
H -3.10635600 -1.65884400 1.38842600  
O 0.40216800 3.66738700 0.15285900  
H 0.65283800 3.21736800 -0.67075800  
O 2.22763400 3.76275900 2.26370000  
H 2.34099200 2.84193200 2.52015800  
H 1.62724700 3.70934500 1.49154800  
O -2.07612200 4.41854600 -0.83579400  
H -1.22570800 4.13007500 -0.43792300  
H -2.21499700 3.78443800 -1.54637400  
C 3.21324900 0.73457700 -0.75391600  
C -3.29660100 0.83635200 -0.04752800  
F -3.04632300 1.76533300 0.87181900  
F -3.27931900 1.41890400 -1.24310800  
F -4.56347900 0.41621300 0.16087400  
F 3.11128200 1.85804600 -0.05012000  
F 3.00145400 1.02965800 -2.03496000  
F 4.50132300 0.33372700 -0.65882600

**<sup>5</sup>TS''<sub>2-14</sub>(Me)**

E (SMD/M06-L-D3/def2-TZVP) = -2371.21221426 au  
H (SMD/M06-L-D3/def2-TZVP) = -2370.773883 au  
G (SMD/M06-L-D3/def2-TZVP) = -2370.861855 au  
E (SMD/B3LYP\*-D3/def2-TZVP//SMD/M06-L-D3/def2-TZVP) = -2370.60691442 au  
Mn 0.81883100 0.31828900 -0.38510500  
N -0.19413400 2.25670900 0.45295700  
N 0.36555100 -1.92232300 -0.92223000  
O 1.54207500 0.85034000 -1.82299000  
O 2.21664200 -0.06107800 0.70559400  
N -1.22667700 0.31948400 -1.21545900  
C -1.73352300 -0.83757700 -1.64802400  
C -0.73685000 -1.92708300 -1.89877700  
C -3.09301100 -0.98557000 -1.86944700  
H -3.48244900 -1.93249600 -2.21765400  
C -3.92852900 0.08941300 -1.61501900  
H -4.99561100 -0.00285200 -1.76877400  
C -3.39463700 1.27275100 -1.13185500  
H -4.02315800 2.11988100 -0.89359700  
C -2.02605700 1.35039900 -0.93337300  
C -1.33461400 2.57643700 -0.42468800  
N -0.43601400 -0.38436700 1.23083900  
C -0.79324600 -1.67249300 1.24497100  
C -0.00448900 -2.57399300 0.34694200  
C -1.81923500 -2.11804400 2.06120100  
H -2.09563800 -3.16337800 2.05595700  
C -2.48730400 -1.19857200 2.85300000  
H -3.29966400 -1.52003600 3.49124900  
C -2.13293500 0.13934800 2.79876100  
H -2.65747000 0.88608800 3.37868100  
C -1.09671300 0.51848700 1.96236000  
C -0.61980200 1.93048300 1.82767700  
H -2.04346500 3.24436800 0.07475100  
H -0.93439100 3.12041000 -1.28372900  
H -0.29413600 -1.75711300 -2.88336700  
H -1.23197300 -2.90272800 -1.93679400  
H -0.54343500 -3.51062800 0.17218800  
H 0.92529600 -2.83454900 0.85975100  
H 0.25441100 2.05359900 2.47154700  
H -1.37970400 2.63232900 2.18472700  
O 3.86410100 -0.09667300 -0.10803700  
H 3.41833600 -0.12745300 -0.97134600  
O 4.10369100 -2.53219600 1.20271800  
H 3.20479900 -2.68779700 1.51119100

H 4.02335000 -1.69635300 0.69501300  
 O 4.09023900 2.66170600 -0.34416400  
 H 4.03329200 1.69032500 -0.21224100  
 H 3.27136000 2.86390100 -0.81060700  
 C 1.55608500 -2.55487900 -1.49234500  
 H 2.37250100 -2.50383700 -0.77371400  
 H 1.37914000 -3.60578200 -1.74590800  
 H 1.85044600 -2.02420200 -2.39589300  
 C 0.75621800 3.37058600 0.47195300  
 H 1.08717200 3.57763000 -0.54424400  
 H 0.30865700 4.28126900 0.88425100  
 H 1.61834700 3.10071900 1.07844100

### MECP1

Energy of Triplet State: -2378.2542902900

Energy of Quintet State: -2378.2542928200

|    |            |            |            |
|----|------------|------------|------------|
| 25 | -0.4783083 | 0.2213493  | -0.0318364 |
| 7  | -2.3727839 | 0.6853327  | 0.9697135  |
| 7  | 1.6458551  | -0.2769738 | 0.1829538  |
| 8  | -1.1017882 | -0.9513707 | -1.1421719 |
| 8  | -0.2905942 | 1.4594235  | -1.2272571 |
| 7  | -0.5917428 | -1.1569599 | 1.4507953  |
| 6  | 0.5250773  | -1.7452894 | 1.8747218  |
| 6  | 1.7769163  | -1.0394259 | 1.4757277  |
| 6  | 0.4465548  | -2.8459437 | 2.7097163  |
| 1  | 1.3480285  | -3.3382062 | 3.0466327  |
| 6  | -0.8097532 | -3.2806097 | 3.1063163  |
| 1  | -0.8975640 | -4.1392495 | 3.7585807  |
| 6  | -1.9544017 | -2.6109426 | 2.6951017  |
| 1  | -2.9371836 | -2.9169512 | 3.0245644  |
| 6  | -1.8097088 | -1.5315139 | 1.8440441  |
| 6  | -2.9085318 | -0.6730617 | 1.3011045  |
| 7  | 0.1823338  | 1.5183947  | 1.3794547  |
| 6  | 1.4634964  | 1.8837855  | 1.3204601  |
| 6  | 2.2796635  | 1.0668911  | 0.3685480  |
| 6  | 1.9194425  | 2.9177271  | 2.1164169  |
| 1  | 2.9576986  | 3.2158118  | 2.0805414  |
| 6  | 1.0103982  | 3.5530122  | 2.9517242  |
| 1  | 1.3386108  | 4.3767672  | 3.5715728  |
| 6  | -0.3083497 | 3.1275499  | 3.0181819  |
| 1  | -1.0198922 | 3.5923497  | 3.6861025  |
| 6  | -0.6970416 | 2.0720046  | 2.2121332  |
| 6  | -2.0152973 | 1.3759328  | 2.2601278  |
| 1  | -3.7258492 | -0.6022332 | 2.0207983  |

|   |            |            |            |
|---|------------|------------|------------|
| 1 | -3.3090093 | -1.1177246 | 0.3902538  |
| 1 | 2.6301009  | -1.7135633 | 1.4479849  |
| 1 | 1.9990687  | -0.3227003 | 2.2687240  |
| 1 | 3.3024791  | 0.9655425  | 0.7354173  |
| 1 | 2.3246866  | 1.5639323  | -0.6003202 |
| 1 | -2.8127935 | 2.0419758  | 2.5818381  |
| 1 | -1.9401407 | 0.6154204  | 3.0398155  |
| 6 | 2.2873143  | -1.0637866 | -0.9781477 |
| 6 | -3.3864094 | 1.5261478  | 0.1671029  |
| 6 | -4.7494973 | 1.5150186  | 0.8513749  |
| 6 | -3.5320245 | 0.9617747  | -1.2353260 |
| 6 | -2.8646751 | 2.9530554  | 0.0754568  |
| 6 | 1.9172013  | -0.4238755 | -2.3048272 |
| 6 | 1.7525450  | -2.4885286 | -0.9488155 |
| 6 | 3.8061534  | -1.0765216 | -0.8394803 |
| 1 | -4.7032933 | 1.8139577  | 1.8975207  |
| 1 | -5.3924612 | 2.2286948  | 0.3389316  |
| 1 | -5.2306947 | 0.5403189  | 0.7901425  |
| 1 | -2.6085179 | 1.0538449  | -1.7997896 |
| 1 | -3.8407994 | -0.0818929 | -1.2394399 |
| 1 | -4.3059766 | 1.5298970  | -1.7496327 |
| 1 | -3.4898970 | 3.5029450  | -0.6257701 |
| 1 | -2.9078075 | 3.4838198  | 1.0251786  |
| 1 | -1.8427399 | 2.9767539  | -0.3002704 |
| 1 | 0.8499813  | -0.4909973 | -2.4958076 |
| 1 | 2.2179629  | 0.6202928  | -2.3673687 |
| 1 | 2.4409435  | -0.9591326 | -3.0957081 |
| 1 | 2.1321029  | -3.0684406 | -0.1090881 |
| 1 | 0.6637387  | -2.5014645 | -0.9280013 |
| 1 | 2.0741135  | -2.9948957 | -1.8572018 |
| 1 | 4.1421017  | -1.4322130 | 0.1334136  |
| 1 | 4.2097613  | -1.7550028 | -1.5892180 |
| 1 | 4.2420821  | -0.0952545 | -1.0195434 |

## MECP2

Energy of Quintet State: -2378.2082146400

Energy of Septet State: -2378.2082163000

|    |            |            |            |
|----|------------|------------|------------|
| 25 | -0.4676116 | 0.2121057  | -0.2840654 |
| 7  | -2.5258929 | 0.7128090  | 1.0309931  |
| 7  | 1.8443691  | -0.3254097 | 0.1725816  |
| 8  | -1.3533801 | -0.3621785 | -1.9915515 |
| 8  | -0.3710477 | 1.5212439  | -1.5481542 |
| 7  | -0.5839340 | -1.1733388 | 1.2796872  |
| 6  | 0.5323512  | -1.7329261 | 1.7694799  |

|   |            |            |            |
|---|------------|------------|------------|
| 6 | 1.8388210  | -1.0773708 | 1.4380630  |
| 6 | 0.4568910  | -2.7793659 | 2.6731787  |
| 1 | 1.3674613  | -3.2344574 | 3.0379447  |
| 6 | -0.7860857 | -3.1951604 | 3.1158199  |
| 1 | -0.8666174 | -4.0087557 | 3.8244335  |
| 6 | -1.9218680 | -2.5263731 | 2.6913218  |
| 1 | -2.9008265 | -2.7733152 | 3.0780599  |
| 6 | -1.7901365 | -1.5049824 | 1.7678061  |
| 6 | -2.9472884 | -0.6689452 | 1.3150781  |
| 7 | 0.1851590  | 1.5078437  | 1.2297533  |
| 6 | 1.4811511  | 1.8471463  | 1.2363519  |
| 6 | 2.3961567  | 1.0237356  | 0.3719888  |
| 6 | 1.9330419  | 2.8677385  | 2.0543484  |
| 1 | 2.9834891  | 3.1244981  | 2.0610648  |
| 6 | 1.0212701  | 3.5268943  | 2.8621120  |
| 1 | 1.3471322  | 4.3437796  | 3.4922910  |
| 6 | -0.2969502 | 3.1050881  | 2.8992516  |
| 1 | -1.0154053 | 3.5581023  | 3.5689840  |
| 6 | -0.6880497 | 2.0569378  | 2.0826326  |
| 6 | -2.0247837 | 1.3852160  | 2.2390078  |
| 1 | -3.7312421 | -0.7255893 | 2.0779205  |
| 1 | -3.3668593 | -1.0970890 | 0.4038380  |
| 1 | 2.6492141  | -1.8060122 | 1.4944625  |
| 1 | 2.0348612  | -0.3830477 | 2.2602996  |
| 1 | 3.3893305  | 1.0115948  | 0.8335128  |
| 1 | 2.5082065  | 1.5061918  | -0.5997640 |
| 1 | -2.7446726 | 2.0917966  | 2.6551115  |
| 1 | -1.8833877 | 0.6388085  | 3.0264330  |
| 6 | 2.4827587  | -1.1025289 | -0.9592677 |
| 6 | -3.5832373 | 1.5201058  | 0.3125224  |
| 6 | -4.8856922 | 1.5672837  | 1.1072024  |
| 6 | -3.8537624 | 0.9077366  | -1.0540999 |
| 6 | -3.0496265 | 2.9327862  | 0.1068152  |
| 6 | 2.1637177  | -0.4295074 | -2.2857569 |
| 6 | 1.8502270  | -2.4885533 | -0.9911025 |
| 6 | 3.9917487  | -1.2054763 | -0.7754052 |
| 1 | -4.7356567 | 1.9565987  | 2.1145787  |
| 1 | -5.5966521 | 2.2239943  | 0.6069576  |
| 1 | -5.3485985 | 0.5841056  | 1.1867391  |
| 1 | -2.9373180 | 0.8514612  | -1.6479189 |
| 1 | -4.2947133 | -0.0859274 | -1.0016012 |
| 1 | -4.5540545 | 1.5404758  | -1.5993000 |
| 1 | -3.7366881 | 3.4845237  | -0.5333908 |
| 1 | -2.9623742 | 3.4886378  | 1.0396957  |

|   |            |            |            |
|---|------------|------------|------------|
| 1 | -2.0752135 | 2.9155274  | -0.3825650 |
| 1 | 1.0922780  | -0.4474720 | -2.4828829 |
| 1 | 2.5035146  | 0.6034701  | -2.3377094 |
| 1 | 2.6631367  | -0.9739932 | -3.0865617 |
| 1 | 2.1196708  | -3.1040263 | -0.1336695 |
| 1 | 0.7612471  | -2.4127656 | -1.0386185 |
| 1 | 2.1852859  | -3.0149094 | -1.8836500 |
| 1 | 4.2597468  | -1.6311627 | 0.1918133  |
| 1 | 4.4148684  | -1.8508894 | -1.5442111 |
| 1 | 4.4734071  | -0.2317105 | -0.8647231 |

**<sup>5</sup>TS<sub>2-14</sub>(H)**

E (SMD/M06-L-D3/def2-TZVP) = -2139.65606 au

H (SMD/M06-L-D3/def2-TZVP) = -2139.328869 au

G (SMD/M06-L-D3/def2-TZVP) = -2139.397796 au

E (SMD/B3LYP\*-D3/def2-TZVP//SMD/M06-L-D3/def2-TZVP) = -2139.126153 au

Mn -0.25043300 -0.13149400 -0.37491900

N -2.19516900 0.26290700 0.83670700

N 2.03575400 -0.56003200 -0.00633900

O -0.75235700 -1.36406100 -1.43319400

O -0.11403900 1.31168800 -1.41366400

N -0.15053500 -1.48137700 1.35862700

C 1.02725200 -1.99275700 1.72386100

C 2.15285800 -1.81097300 0.75109800

C 1.17367600 -2.66329000 2.92747100

H 2.13848800 -3.06483100 3.20595700

C 0.07380500 -2.78279100 3.76007200

H 0.16381000 -3.29232400 4.71042200

C -1.13356700 -2.21832100 3.38415700

H -2.00246300 -2.26580000 4.02631800

C -1.21003500 -1.56139200 2.16704500

C -2.46774000 -0.91882700 1.66467900

N 0.34379300 1.17007700 1.27400500

C 1.63395700 1.25142900 1.61192000

C 2.60446200 0.61382800 0.66517100

C 2.02954200 1.90783800 2.76567300

H 3.07852700 1.95533800 3.02416500

C 1.05961200 2.47324400 3.57626500

H 1.34204100 2.98366200 4.48766600

C -0.27580700 2.35586300 3.22940000

H -1.05914100 2.75919600 3.85642100

C -0.60392000 1.68511100 2.06270700

C -2.01610600 1.50714700 1.59502400

H -3.12731300 -0.68268600 2.50421900

H -2.99706600 -1.64002300 1.03809100  
H 2.12164500 -2.63205100 0.03134600  
H 3.11138700 -1.88381900 1.27277800  
H 3.53271800 0.37259400 1.19099900  
H 2.85928800 1.34136400 -0.10853300  
H -2.26534600 2.33531200 0.92800900  
H -2.70146500 1.56721900 2.44500700  
O -0.46996400 0.94810800 -3.24570700  
H -0.64493900 0.03853500 -2.94283700  
H 2.50754200 -0.67848000 -0.89213500  
H -2.96932500 0.38804200 0.19902100

(H<sub>2</sub>O)<sub>4</sub>OH<sup>-</sup>

E (SMD/M06-L-D3/def2-TZVP) = -381.822049 au  
H (SMD/M06-L-D3/def2-TZVP) = -381.701873 au  
G (SMD/M06-L-D3/def2-TZVP) = -381.751508 au  
E (SMD/B3LYP\*-D3/def2-TZVP//SMD/M06-L-D3/def2-TZVP) = -381.732491 au  
O -1.47678000 -1.56711600 0.10438600  
H -2.28566600 -1.07234300 -0.05944600  
O 0.14057300 -0.39028800 -1.61805800  
H -0.07621900 0.53397200 -1.41032300  
H -0.48666100 -0.89086600 -0.99768200  
O -0.14135300 0.08713700 1.67064300  
H -0.67566400 -0.57295400 1.11835200  
O -0.72258400 2.03742900 -0.24955500  
H -1.65368600 1.89621300 -0.45151300  
H -0.54813400 1.41339800 0.49044600  
O 2.28563700 -0.34427300 0.15247900  
H 2.68346500 0.52525500 0.04112900  
H 1.59414100 -0.38115000 -0.54712600  
H 0.76448400 -0.03464000 1.33701000

<sup>5</sup>TS<sup>'''</sup><sub>2-14</sub>

E (SMD/M06-L-D3/def2-TZVP) = -2760.083327 au  
H (SMD/M06-L-D3/def2-TZVP) = -2759.412219 au  
G (SMD/M06-L-D3/def2-TZVP) = -2759.523493 au  
E (SMD/B3LYP\*-D3/def2-TZVP//SMD/M06-L-D3/def2-TZVP) = -2759.312634 au  
Mn -0.03631300 0.06563600 -0.03861500  
N 1.20195600 2.11949600 0.37803300  
N 0.50495200 -2.27309000 -0.37387800  
O -1.18167000 0.17622100 1.22200200  
O -0.92587700 0.33401200 -1.56685000  
N 1.48471600 -0.35002100 1.40046500  
C 1.92480500 -1.59651900 1.57626200

C 1.71354300 -2.54569000 0.43333600  
C 2.65499000 -1.93028800 2.70582700  
H 2.98914800 -2.94884100 2.85061600  
C 2.96009100 -0.93264700 3.61725100  
H 3.52874000 -1.16785200 4.50739700  
C 2.56966200 0.37385600 3.36908100  
H 2.84413000 1.18065700 4.03488000  
C 1.81900800 0.63676600 2.23549600  
C 1.37197100 2.01530800 1.84036400  
N 1.66120400 -0.05314000 -1.32908100  
C 1.75170300 -1.11416400 -2.13720900  
C 0.84758500 -2.26670300 -1.80976400  
C 2.66944100 -1.13432000 -3.17372500  
H 2.73947400 -2.00116100 -3.81646800  
C 3.48977500 -0.03219700 -3.35444500  
H 4.19994800 -0.01348900 -4.17065800  
C 3.42912200 1.02688000 -2.46338200  
H 4.09586300 1.87433000 -2.54836500  
C 2.50788100 0.97518200 -1.42965800  
C 2.50837400 1.95649100 -0.29526200  
H 2.09783900 2.73987200 2.22438700  
H 0.41773300 2.23841500 2.31987900  
H 1.74776400 -3.57764300 0.78518700  
H 2.59188800 -2.43831300 -0.20925600  
H 1.33801100 -3.19538700 -2.12001000  
H -0.07203900 -2.18590200 -2.39023900  
H 2.92705400 2.91052700 -0.61807600  
H 3.22783600 1.56805200 0.43116400  
C -0.63454000 -3.21548600 -0.03443200  
C 0.49379000 3.38980500 -0.05491500  
C 1.16324600 4.62345500 0.54252700  
C -0.96292500 3.33214900 0.37861000  
C 0.52452200 3.46663300 -1.57708000  
C -1.92446300 -2.68789300 -0.64334700  
C -0.80760400 -3.23775500 1.47994800  
C -0.35867400 -4.62425700 -0.54918400  
H 2.23191600 4.65649600 0.32795900  
H 0.71660100 5.52084100 0.11595800  
H 1.02997800 4.67404600 1.62280200  
H -1.48022000 2.51304300 -0.11908400  
H -1.08487700 3.21318200 1.45455400  
H -1.45398900 4.26395400 0.09852500  
H -0.12372500 4.27902900 -1.90217800  
H 1.51811900 3.67103600 -1.97379200

H 0.15199100 2.54286700 -2.02175700  
H -2.16106500 -1.70068400 -0.24840500  
H -1.89331200 -2.62338600 -1.73059600  
H -2.74060400 -3.36161500 -0.38353300  
H 0.01116900 -3.73931500 1.99444500  
H -0.90401600 -2.22602000 1.87643600  
H -1.71989800 -3.78081100 1.72334100  
H 0.59539900 -5.01396600 -0.19328100  
H -1.13852100 -5.29816500 -0.19641800  
H -0.35988000 -4.66474200 -1.63808100  
O -2.79188100 0.62976200 -1.32879000  
H -2.62306700 0.38717000 -0.40136700  
O -4.89951100 -1.15273800 -0.79348400  
H -4.53935500 -1.08722500 0.11521400  
H -4.20904700 -0.68149800 -1.29763600  
O -4.35903500 2.19872400 0.62027000  
H -3.73595900 2.01095900 -0.10066600  
O -3.77698400 -0.43747600 1.71381500  
H -2.80116100 -0.37668300 1.57481300  
H -4.06300200 0.46743100 1.48376600  
O -6.64821600 0.99284300 -0.47541700  
H -7.23640600 0.76907600 0.25335500  
H -6.11278400 0.18030400 -0.61089900  
H -5.21207500 1.87537700 0.26255400

**<sup>5</sup>a**

E (SMD/M06-L-D3/def2-TZVP) = -2380.032598 au  
H (SMD/M06-L-D3/def2-TZVP) = -2379.445910 au  
G (SMD/M06-L-D3/def2-TZVP) = -2379.530151 au  
Mn 0.04757000 0.02567600 0.83562400  
N -2.20922500 0.39570700 0.00496600  
N 2.19486900 -0.40569500 0.02630300  
O 0.14414900 1.65585500 2.21471500  
O -0.10163000 -1.37329100 2.02405000  
N 0.18443400 1.38176500 -0.68654200  
C 1.35101100 1.50728200 -1.33907600  
C 2.28824800 0.34604800 -1.24901700  
C 1.56994700 2.59697500 -2.16180700  
H 2.52083700 2.70436200 -2.66456100  
C 0.54786700 3.51442400 -2.34187200  
H 0.70052900 4.37630700 -2.97765300  
C -0.68532600 3.30240400 -1.74892700  
H -1.52141900 3.96276900 -1.93131100  
C -0.84720800 2.21020600 -0.91579700

C -2.15493500 1.84393800 -0.28051200  
N -0.17571300 -1.37887400 -0.71330000  
C 0.84356800 -2.21936800 -0.91287300  
C 2.13813600 -1.85563700 -0.24624400  
C 0.68782700 -3.32230800 -1.73398300  
H 1.52068200 -3.99149300 -1.89963800  
C -0.54156800 -3.53140200 -2.33718600  
H -0.69289300 -4.39546600 -2.97053300  
C -1.56428400 -2.61330400 -2.16323200  
H -2.51617600 -2.72519300 -2.66406700  
C -1.34118800 -1.51555500 -1.35021800  
C -2.29193000 -0.36010900 -1.26086500  
H -2.96592000 2.16561600 -0.94128900  
H -2.28496000 2.40019600 0.64928200  
H 3.31023600 0.65284800 -1.47091200  
H 2.00923100 -0.32308500 -2.06744600  
H 2.96491300 -2.18349600 -0.88294200  
H 2.23060400 -2.39648500 0.69615300  
H -3.30932100 -0.68412200 -1.48201100  
H -2.02265100 0.30854400 -2.08304400  
C 3.30599200 -0.02034900 0.99474500  
C -3.30880100 0.01572600 0.98085600  
C -4.65488400 0.57460600 0.53526300  
C -2.95385000 0.55509300 2.35763200  
C -3.37994600 -1.50415500 1.06319600  
C 2.96340400 -0.53727200 2.38205500  
C 3.38489900 1.49946100 1.06170400  
C 4.64327800 -0.59393400 0.54205900  
H -4.90903000 0.26844600 -0.47973800  
H -5.43707300 0.20105700 1.19488500  
H -4.67879200 1.66289900 0.58211300  
H -2.00531600 0.14472000 2.70274100  
H -2.89699700 1.64329100 2.38369000  
H -3.72669100 0.26126500 3.06674800  
H -4.05247500 -1.78088300 1.87345100  
H -3.77055900 -1.95874800 0.15371000  
H -2.40263900 -1.93524800 1.27916200  
H 2.06867200 -0.05381500 2.77013200  
H 2.81432900 -1.61507800 2.41193600  
H 3.78671900 -0.30497300 3.05640700  
H 3.78107000 1.94638700 0.15099000  
H 2.40891100 1.93773400 1.27112800  
H 4.05396400 1.77945900 1.87367200  
H 4.88321800 -0.31560000 -0.48422700

H 5.43574700 -0.20450400 1.17956400  
H 4.66577300 -1.68047500 0.61721700  
H 0.08343800 -1.03795800 2.91170800  
H 0.19672100 1.28914100 3.10884900  
H -0.68141700 2.15999500 2.21871900
